# Supplementary material for: Light-driven asymmetric coupling of aromatic aldehydes and aryl iodides using a simple amine reductant
Source: Royal Society of Chemistry journal article supplement (doi:10.1039/d3gc04014c), 2023-12-08
Supplement: d3gc04014c1.pdf [file d3gc04014c1.pdf]

## Supporting Information

### **Light-Driven Asymmetric Coupling of Aromatic Aldehydes and Aryl Iodides Using Simple Amine Reductant**

Tongyu Han,<sup>‡a</sup> Quansheng Mou,<sup>‡a</sup> Yuyu Lv,<sup>b</sup> Mingxin Liu<sup>\*a</sup>

<sup>a</sup>State Key Laboratory of Applied Organic Chemistry, College of Chemistry and Chemical Engineering, Lanzhou University, 222 Tianshui South Road, Chengguan District, Lanzhou 730000, China

<sup>b</sup>College of Chemistry and Chemical Engineering, Northwest Normal University, 967 Anning East Road, Lanzhou 730070, China

<sup>†</sup>These authors contributed equally to this work.

\*E-mail: liumx@lzu.edu.cn

#### **Table of Contents**

|                                                                  |            |
|------------------------------------------------------------------|------------|
| 1. General Information.....                                      | <b>S2</b>  |
| 2. Optimization of the reaction conditions.....                  | <b>S3</b>  |
| 3. General Procedures and Characterization Data of Products..... | <b>S6</b>  |
| 4. Radical Trapping Experiments.....                             | <b>S15</b> |
| 5. Secondary isotope effect.....                                 | <b>S18</b> |
| 6. UV-vis studies.....                                           | <b>S19</b> |
| 7. Comparison with previous work.....                            | <b>S20</b> |
| 8. References.....                                               | <b>S21</b> |
| 9. Copies of NMR Spectra for the Products.....                   | <b>S22</b> |
| 10. Copies of HPLC Spectra for the Products.....                 | <b>S55</b> |

## 1. General Information

All reactions were carried out under an argon atmosphere in a flame-dried quartz tube with magnetic stirring. Petroleum ether, ethyl acetate and other solvents were dried and purified according to the procedure from "Purification of Laboratory Chemicals".<sup>1</sup> The reactions were monitored by TLC analysis using silica gel GF-254 thin layer plates and compounds were visualized with a UV light at 254 nm. All products were purified by flash chromatography on silica gel. The chemical yields referred are isolated products. <sup>1</sup>H and <sup>13</sup>C NMR spectra were collected on a Bruker AVANCE III 400MHz and JEOL JNM-ECS 400M at room temperature. Chemical shifts ( $\delta$ ) are expressed in ppm downfield from TMS as internal standard. The letters s, d, t, q, and m are used to indicate singlet, doublet, triplet, quadruplet, and multiplet, respectively. <sup>19</sup>F NMR spectra were collected on Bruker AVANCE III 400 MHz spectrometers at room temperature. HRMS was performed on Bruker Apex II FT-ICR mass instrument (ESI) and Waters GCT Premier TOFMS (EI). Enantiomeric excesses (ee) values were determined by chiral HPLC with chiral AD-H, OB, OD-H, OJ, IC columns with hexane and *i*-PrOH as solvents.

The absolute configuration of the product was determined by comparing the specific optical rotation of **3h** ( $[\alpha]_D^{24} = -39.00$ ,  $c = 1$ , CH<sub>2</sub>Cl<sub>2</sub>) with the literature (*R*-**3h**,  $[\alpha]_D^{20} = 28.50$ ,  $c = 0.1$ , CH<sub>2</sub>Cl<sub>2</sub>).<sup>2</sup> Therefore, the product **3h** obtained via our protocol with (*S,S*)-BDPP as the chiral ligand is *S* configuration. The absolute configuration of other products were assigned accordingly.

The equipment of light-reaction is a multi-channel photoreactor with 10 W black LED (365–370 nm, composed of 2 LED units in series, manufacturer: Shanghai Yukang Science and Education Instrument and Equipment company, wavelength of peak intensity: 367.2 nm).

## 2. Optimization of Reaction Conditions<sup>a</sup>

**Table S1. The Effect of Chiral Ligand<sup>a</sup>**

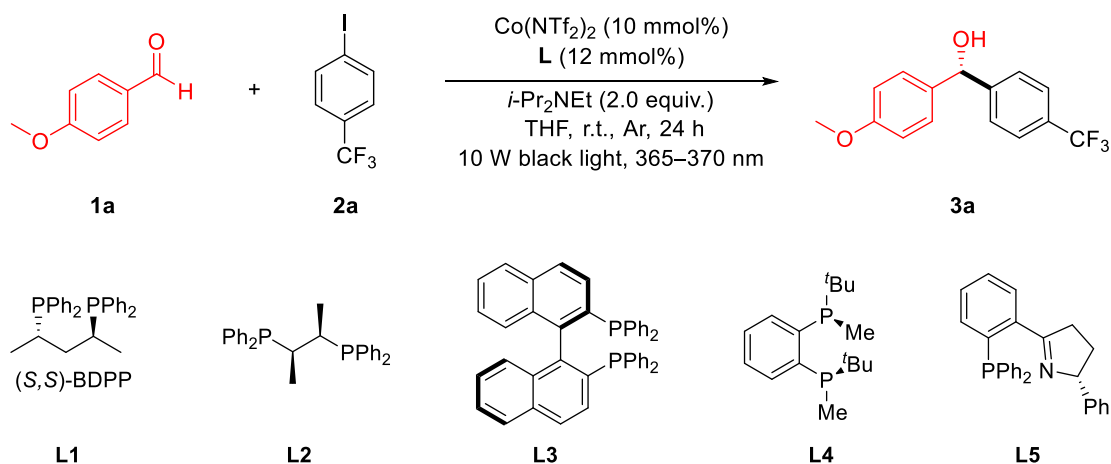

| Entry | Chiral Ligand | Yield (%) <sup>b</sup> | ee (%) <sup>c</sup> |
|-------|---------------|------------------------|---------------------|
| 1     | <b>L1</b>     | 39                     | 95                  |
| 2     | <b>L2</b>     | trace                  | -                   |
| 3     | <b>L3</b>     | trace                  | -                   |
| 4     | <b>L4</b>     | 9                      | 94                  |
| 5     | <b>L5</b>     | 23                     | -93                 |

<sup>a</sup>Reaction condition: **1a** (0.2 mmol), **2a** (0.3 mmol)  $\text{Co}(\text{NTf}_2)_2$  (10 mmol%), ligand (12 mmol%),  $i\text{-Pr}_2\text{NEt}$  (2.0 equiv.), THF (1 mL), 10 W black light, room temperature. <sup>b</sup>Isolated yield. <sup>c</sup>Determined by chiral HPLC.

**Table S2. The Effect of Co Catalyst<sup>a</sup>**

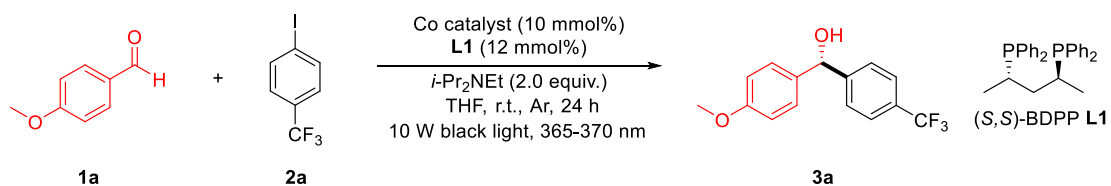

| Entry | Co catalyst                 | Yield (%) <sup>b</sup> | ee (%) <sup>c</sup> |
|-------|-----------------------------|------------------------|---------------------|
| 1     | $\text{Co}(\text{NTf}_2)_2$ | 39                     | 95                  |
| 2     | $\text{Co}(\text{OTf})_2$   | 23                     | 95                  |
| 3     | $\text{CoI}_2$              | 27                     | 95                  |
| 4     | $\text{CoBr}_2$             | trace                  | -                   |
| 5     | $\text{Co}(\text{acac})_2$  | trace                  | -                   |

<sup>a</sup>Reaction condition: **1a** (0.2 mmol), **2a** (0.3 mmol) Co catalyst (10 mmol%), **L1** (12 mmol%),  $i\text{-Pr}_2\text{NEt}$  (2.0 equiv.), THF (1 mL), 10 W black light, room temperature. <sup>b</sup>Isolated yield. <sup>c</sup>Determined by chiral HPLC.

**Table S3. The Effect of Base<sup>a</sup>**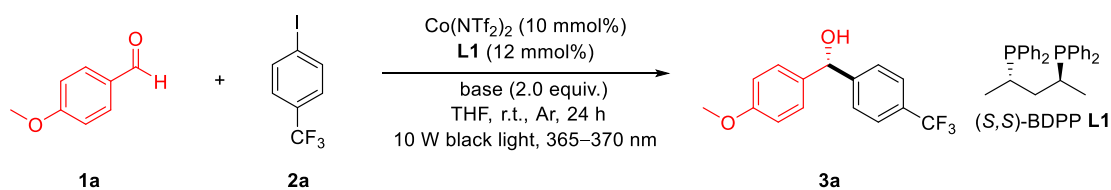

| Entry | Base                            | Yield (%) <sup>b</sup> | ee (%) <sup>c</sup> |
|-------|---------------------------------|------------------------|---------------------|
| 1     | <i>i</i> -Pr <sub>2</sub> NEt   | 39                     | 95                  |
| 2     | Et <sub>3</sub> N               | trace                  | -                   |
| 3     | DBACO                           | trace                  | -                   |
| 4     | Na <sub>2</sub> CO <sub>3</sub> | 0                      | -                   |

<sup>a</sup>Reaction condition: **1a** (0.2 mmol), **2a** (0.3 mmol)  $\text{Co}(\text{NTf}_2)_2$  (10 mmol%), **L1** (12 mmol%), base (2.0 equiv.), THF (1 mL), 10 W black light, room temperature. <sup>b</sup>Isolated yield. <sup>c</sup>Determined by chiral HPLC.

**Table S4. The Effect of Solvent<sup>a</sup>**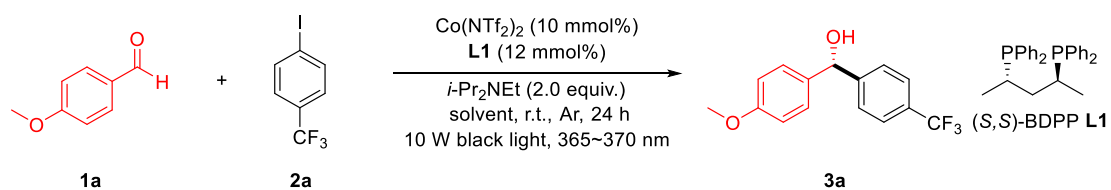

| Entry          | Solvent          | Yield (%) <sup>b</sup> | ee (%) <sup>c</sup> |
|----------------|------------------|------------------------|---------------------|
| 1              | THF              | 39                     | 95                  |
| 2              | DCM              | 25                     | 93                  |
| 3              | Toluene          | 74                     | 95                  |
| 4              | <i>o</i> -Xylene | 83                     | 95                  |
| 5              | Benzotrifluoride | trace                  | -                   |
| 6              | 1,4-Dioxane      | 48                     | 95                  |
| 7 <sup>d</sup> | <i>o</i> -Xylene | 96                     | 95                  |

<sup>a</sup>Reaction condition: **1a** (0.2 mmol), **2a** (0.3 mmol)  $\text{Co}(\text{NTf}_2)_2$  (10 mmol%), **L1** (12 mmol%), *i*-Pr<sub>2</sub>NEt (2.0 equiv.), solvent (1 mL), 10 W black light, room temperature. <sup>b</sup>Isolated yield. <sup>c</sup>Determined by chiral HPLC. <sup>d</sup>the reaction time reached 36 hours.

**Table S5. The Effect of *i*-Pr<sub>2</sub>NEt Equivalent<sup>a</sup>**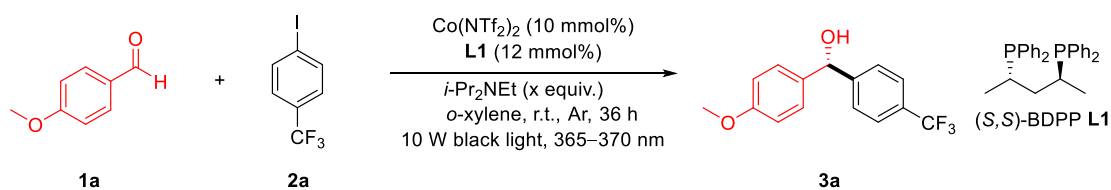

| Entry | Equivalent of <i>i</i> -Pr <sub>2</sub> NEt | Yield (%) <sup>b</sup> | ee (%) <sup>c</sup> |
|-------|---------------------------------------------|------------------------|---------------------|
| 1     | 1.5                                         | 51                     | 95                  |
| 2     | 2.0                                         | 83                     | 95                  |
| 3     | 2.5                                         | 82                     | 94                  |

<sup>a</sup>Reaction condition: **1a** (0.2 mmol), **2a** (0.3 mmol)  $\text{Co}(\text{NTf}_2)_2$  (10 mmol%), **L1** (12 mmol%), *i*-Pr<sub>2</sub>NEt (x equiv.), *o*-xylene (1 mL), 10 W black light, room temperature. <sup>b</sup>Isolated yield.

<sup>c</sup>Determined by chiral HPLC.

**Table S6. Control Experiment<sup>a</sup>**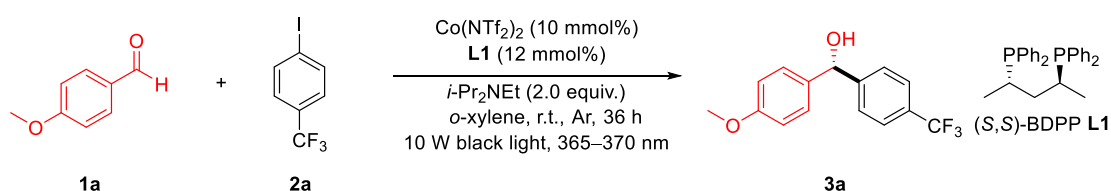

| Entry | Variation                      | Yield (%) <sup>b</sup> | ee (%) <sup>c</sup> |
|-------|--------------------------------|------------------------|---------------------|
| 1     | No $\text{Co}(\text{NTf}_2)_2$ | 0                      | -                   |
| 2     | No <b>L1</b>                   | 0                      | -                   |
| 3     | No light source                | 0                      | -                   |

<sup>a</sup>Reaction condition: **1a** (0.2 mmol), **2a** (0.3 mmol)  $\text{Co}(\text{NTf}_2)_2$  (10 mmol%), **L1** (12 mmol%), *i*-Pr<sub>2</sub>NEt (2.0 equiv.), *o*-xylene (1 mL), 10 W black light, room temperature. <sup>b</sup>Isolated yield.

<sup>c</sup>Determined by chiral HPLC.

**Table S7. Other organic halogens<sup>a</sup>**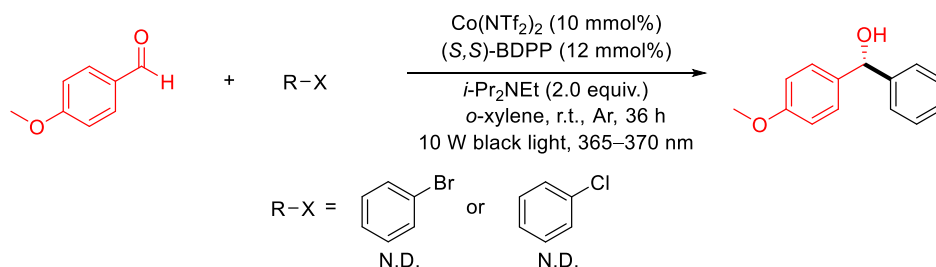

<sup>a</sup>Reaction condition: *p*-anisaldehyde (0.2 mmol), aryl halogens (0.3 mmol)  $\text{Co}(\text{NTf}_2)_2$  (10 mmol%), (S,S)-BDPP (12 mmol%), *i*-Pr<sub>2</sub>NEt (2.0 equiv.), *o*-xylene (1 mL), 10 W black light, room temperature.

<sup>b</sup>N.D.: No detected.

**Table S8. Unsaturated or aliphatic aldehydes<sup>a</sup>**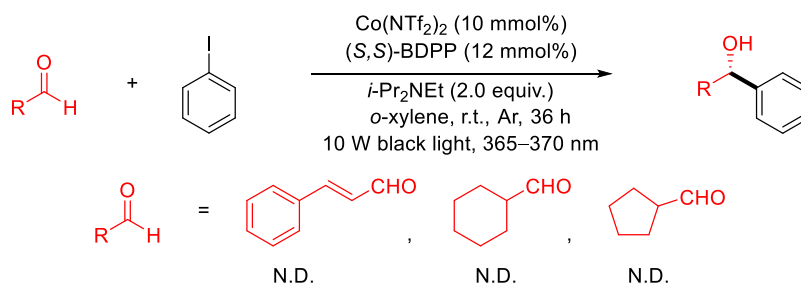

<sup>a</sup>Reaction condition: unsaturated or aliphatic aldehydes (0.2 mmol), iodobenzene (0.3 mmol) Co(NTf<sub>2</sub>)<sub>2</sub> (10 mmol%), (S,S)-BDPP (12 mmol%), *i*-Pr<sub>2</sub>NEt (2.0 equiv.), *o*-xylene (1 mL), 10 W black light, room temperature. <sup>b</sup>N.D.: No detected.

### 3. General Procedures and Characterization Data of Products

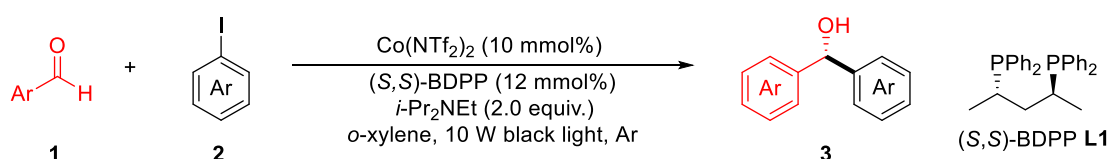

In an argon-filled glovebox, a 10 mL flame-dried quartz tube with magnetic stirring was charged sequentially with Co(NTf<sub>2</sub>)<sub>2</sub> (0.02 mmol, 10 mol%), **L1** (0.024 mmol, 12 mol%) and *o*-xylene (1 mL). After stirring at room temperature for 2 h, substrates **1** (0.2 mmol) and **2** (0.3 mmol), *i*-Pr<sub>2</sub>NEt (0.4 mmol, 2.0 eq.) were sequentially added into the quartz tube. Then, the quartz tube was removed from glovebox. The mixture was stirred at room temperature under 10 W black LEDs until the reaction was completed, as monitored by TLC analysis. The reaction mixture was then concentrated in vacuo. The crude product was purified by flash column chromatography (silica gel, PE/EA) to afford the desired product. Note: The racemic products were prepared according to the known procedure by replacing the chiral ligand **L1** with DPPP.<sup>3</sup>

#### (*R*)-(4-Methoxyphenyl)(4-(trifluoromethyl)phenyl)methanol (**3a**)

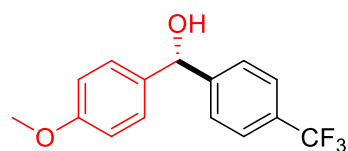

96% (54 mg) isolated yield, white solid,  $[\alpha]_D^{25} = 53.00$  ( $c = 1.00$  in CH<sub>2</sub>Cl<sub>2</sub>); 95% ee, determined by HPLC analysis (Chiralpak AD-H column, hexane/*i*-PrOH, 95:5 v/v, flow rate 1 mL/min,  $\lambda = 254$  nm, 25 °C), t<sub>R</sub> (major) = 21.54 min, t<sub>R</sub> (minor) = 17.75 min; <sup>1</sup>H NMR (400 MHz, CDCl<sub>3</sub>)  $\delta$  7.58 (d,  $J = 8.4$  Hz, 2H), 7.48 (d,  $J = 8.4$  Hz, 2H), 7.24 (d,  $J = 8.8$  Hz, 2H), 6.86 (d,  $J = 8.8$  Hz, 2H), 5.82 (s, 1H), 3.78 (s, 3H), 2.36 (br, 1H). <sup>13</sup>C NMR (100 MHz, CDCl<sub>3</sub>)  $\delta$  159.38, 147.76 (d,  $J_{C-F} = 1.1$  Hz), 135.47,

129.48 (q,  $J_{C-F} = 32.1$  Hz), 128.02, 126.52, 125.31 (q,  $J_{C-F} = 3.8$  Hz), 124.15 (q,  $J_{C-F} = 270.4$  Hz), 114.10, 75.27, 55.27.  $^{19}\text{F NMR}$  (376 MHz,  $\text{CDCl}_3$ )  $\delta$  -62.45.

### (*R*)-Phenyl(*p*-tolyl)methanol (3b)

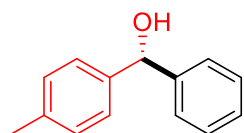

88% (35 mg) isolated yield, white solid,  $[\alpha]_{\text{D}}^{25} = 7.50$  ( $c = 0.40$  in  $\text{CH}_2\text{Cl}_2$ ); 94% ee, determined by HPLC analysis (Chiralpak AD-H column, hexane/*i*-PrOH, 95:5 v/v, flow rate 1 mL/min,  $\lambda = 254$  nm, 25 °C),  $t_{\text{R}}$  (major) = 14.12 min,  $t_{\text{R}}$  (minor) = 15.29 min;  $^1\text{H NMR}$  (400 MHz,  $\text{CDCl}_3$ )  $\delta$  7.37 – 7.30 (m, 4H), 7.25 (d,  $J = 8.0$  Hz, 3H), 7.13 (d,  $J = 8.0$  Hz, 2H), 5.79 (s, 1H), 2.32 (s, 3H), 2.23 (br, 1H).  $^{13}\text{C NMR}$  (100 MHz,  $\text{CDCl}_3$ )  $\delta$  143.94, 140.95, 137.25, 129.16, 128.42, 127.42, 126.50, 126.43, 76.07, 21.08.

### (*R*)-(4-Ethylphenyl)(phenyl)methanol (3c)

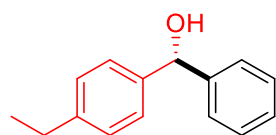

94% (40 mg) isolated yield, white solid,  $[\alpha]_{\text{D}}^{25} = 10.00$  ( $c = 0.30$  in  $\text{CH}_2\text{Cl}_2$ ); 95% ee, determined by HPLC analysis (Chiralpak AD-H column, hexane/*i*-PrOH, 95:5 v/v, flow rate 1 mL/min,  $\lambda = 254$  nm, 25 °C),  $t_{\text{R}}$  (major) = 14.11 min,  $t_{\text{R}}$  (minor) = 15.67 min;  $^1\text{H NMR}$  (400 MHz,  $\text{CDCl}_3$ )  $\delta$  7.38 – 7.24 (m, 7H), 7.16 (d,  $J = 8.0$  Hz, 2H), 5.80 (s, 1H), 2.62 (q,  $J = 7.6$  Hz, 2H), 2.23 (br, 1H), 1.21 (t,  $J = 7.6$  Hz, 3H).  $^{13}\text{C NMR}$  (100 MHz,  $\text{CDCl}_3$ )  $\delta$  143.92, 143.63, 141.17, 128.41, 127.98, 127.42, 126.58, 126.44, 76.11, 28.50, 15.51.

### (*R*)-(4-Isopropylphenyl)(phenyl)methanol (3d)

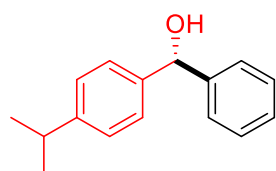

91% (41 mg) isolated yield, yellow oil,  $[\alpha]_{\text{D}}^{22} = 7.00$  ( $c = 1.00$  in  $\text{CH}_2\text{Cl}_2$ ); 95% ee, determined by HPLC analysis (Chiralpak AD-H column, hexane/*i*-PrOH, 95:5 v/v, flow rate 1 mL/min,  $\lambda = 254$  nm, 25 °C),  $t_{\text{R}}$  (major) = 12.55 min,  $t_{\text{R}}$  (minor) = 14.52 min;  $^1\text{H NMR}$  (400 MHz,  $\text{CDCl}_3$ )  $\delta$  7.39 – 7.24 (m, 7H), 7.18 (d,  $J = 8.4$  Hz, 2H), 5.80 (s, 1H), 2.93 – 2.83 (m, 1H), 2.26 (br, 1H), 1.22 (d,  $J = 6.8$  Hz, 6H).  $^{13}\text{C NMR}$  (100 MHz,  $\text{CDCl}_3$ )  $\delta$  148.24, 143.87, 141.26, 128.40, 127.41, 126.55, 126.43, 76.10, 33.77, 23.95.

### (*R*)-(4-(Tert-butyl)phenyl)(phenyl)methanol (3e)

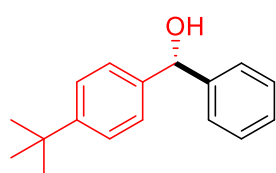

92% (44 mg) isolated yield, white solid,  $[\alpha]_{\text{D}}^{21} = 7.00$  ( $c = 1.00$  in  $\text{CH}_2\text{Cl}_2$ ); 96% ee, determined by HPLC analysis (Chiralpak AD-H column, hexane/*i*-PrOH, 95:5 v/v, flow rate 1 mL/min,  $\lambda = 254$  nm, 25 °C),  $t_{\text{R}}$

(major) = 11.16 min, tR (minor) = 12.98 min;  $^1\text{H NMR}$  (400 MHz,  $\text{CDCl}_3$ )  $\delta$  7.40 – 7.24 (m, 9H), 5.81 (s, 1H), 2.22 (br, 1H), 1.30 (s, 9H).  $^{13}\text{C NMR}$  (100 MHz,  $\text{CDCl}_3$ )  $\delta$  150.51, 143.87, 140.88, 128.41, 127.43, 126.46, 126.29, 125.42, 76.07, 34.49, 31.32.

### **(R)-(4-Methoxyphenyl)(phenyl)methanol (3f)**

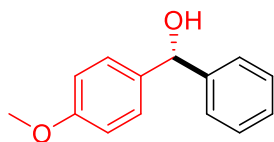

89% (38 mg) isolated yield, white solid,  $[\alpha]_{\text{D}}^{25} = 32.00$  ( $c = 1.00$  in  $\text{CH}_2\text{Cl}_2$ ); 94% ee, determined by HPLC analysis (Chiralpak AD-H column, hexane/*i*-PrOH, 90:10 v/v, flow rate 1 mL/min,  $\lambda = 254$  nm, 25 °C), tR

(major) = 12.57 min, tR (minor) = 13.66 min;  $^1\text{H NMR}$  (400 MHz,  $\text{CDCl}_3$ )  $\delta$  7.38 – 7.24 (m, 7H), 6.86 (d,  $J = 8.8$  Hz, 2H), 5.80 (s, 1H), 3.78 (s, 3H), 2.22 (br, 1H).  $^{13}\text{C NMR}$  (100 MHz,  $\text{CDCl}_3$ )  $\delta$  159.05, 144.04, 136.20, 128.46, 127.94, 127.45, 126.42, 113.89, 75.81, 55.30.

### **(S)-[1,1'-Biphenyl]-4-yl(phenyl)methanol (3g)**

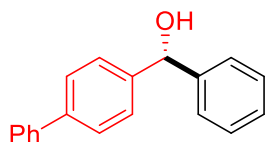

80% (45 mg) isolated yield, white solid,  $[\alpha]_{\text{D}}^{25} = -1.00$  ( $c = 1.00$  in  $\text{CH}_2\text{Cl}_2$ ); 96% ee, determined by HPLC analysis (Chiralpak AD-H column, hexane/*i*-PrOH, 95:5 v/v, flow rate 1 mL/min,  $\lambda = 254$  nm, 25 °C), tR

(major) = 27.20 min, tR (minor) = 24.97 min;  $^1\text{H NMR}$  (400 MHz,  $\text{CDCl}_3$ )  $\delta$  7.56 – 7.54 (m, 4H), 7.41 (t,  $J = 8.0$  Hz, 6H), 7.36 – 7.25 (m, 4H), 5.85 (s, 1H), 2.39 (br, 1H).  $^{13}\text{C NMR}$  (100 MHz,  $\text{CDCl}_3$ )  $\delta$  143.70, 142.78, 140.73, 140.44, 128.73, 128.52, 127.61, 127.26, 127.21, 127.05, 126.94, 126.51, 75.99.

### **(R)-(4-Fluorophenyl)(phenyl)methanol (3h)**

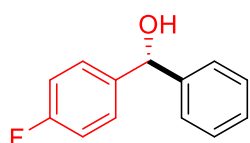

72% (29 mg) isolated yield, yellow oil,  $[\alpha]_{\text{D}}^{23} = 5.00$  ( $c = 1.00$  in  $\text{CH}_2\text{Cl}_2$ ); 95% ee, determined by HPLC analysis (Chiralpak OB column, hexane/*i*-PrOH, 80:20 v/v, flow rate 1 mL/min,  $\lambda = 209.8$  nm, 25 °C), tR

(major) = 14.72 min, tR (minor) = 19.01 min;  $^1\text{H NMR}$  (400 MHz,  $\text{CDCl}_3$ )  $\delta$  7.35 – 7.27 (m, 7H), 7.01 (t,  $J = 8.4$  Hz, 2H), 5.82 (s, 1H), 2.24 (br, 1H).  $^{13}\text{C NMR}$  (100 MHz,  $\text{CDCl}_3$ )  $\delta$  162.13 (d,  $J_{\text{C-F}} = 244.3$  Hz), 143.61, 139.51 (d,  $J_{\text{C-F}} = 3.0$  Hz), 128.57, 128.20 (d,  $J_{\text{C-F}} = 8.0$  Hz), 127.72, 126.43, 115.27 (d,  $J_{\text{C-F}} = 21.2$  Hz), 75.57.  $^{19}\text{F NMR}$  (376 MHz,  $\text{CDCl}_3$ )  $\delta$  -115.06.

### **(S)-(4-Chlorophenyl)(phenyl)methanol (3i)**

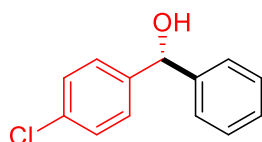

75% (33 mg) isolated yield, yellow oil,  $[\alpha]_{\text{D}}^{23} = -10.00$  ( $c = 1.00$  in  $\text{CH}_2\text{Cl}_2$ ); 95% ee, determined by HPLC analysis (Chiralpak AD-H column,



hexane/*i*-PrOH, 95:5 v/v, flow rate 1 mL/min,  $\lambda = 254$  nm, 25 °C), tR (major) = 14.12 min, tR (minor) = 15.90 min;  $^1\text{H NMR}$  (400 MHz,  $\text{CDCl}_3$ )  $\delta$  7.33 (d,  $J = 4.4$  Hz, 4H), 7.30 – 7.27 (m, 4H), 5.79 (s, 1H), 2.30 (br, 1H).  $^{13}\text{C NMR}$  (100 MHz,  $\text{CDCl}_3$ )  $\delta$  143.45, 142.23, 133.30, 128.66, 128.61, 127.89, 127.88, 126.54, 75.63.

### (S)-(4-Bromophenyl)(phenyl)methanol (3j)

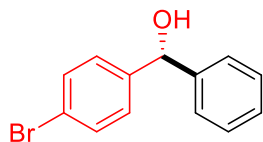

72% (38 mg) isolated yield, yellow oil,  $[\alpha]_{\text{D}}^{23} = -15.00$  ( $c = 1.00$  in  $\text{CH}_2\text{Cl}_2$ );

96% ee, determined by HPLC analysis (Chiralpak OB column,

hexane/*i*-PrOH, 80:20 v/v, flow rate 1 mL/min,  $\lambda = 209.8$  nm, 25 °C), tR

(major) = 8.53 min, tR (minor) = 11.28 min;  $^1\text{H NMR}$  (400 MHz,  $\text{CDCl}_3$ )  $\delta$  7.44 (d,  $J = 8.4$  Hz, 2H),

7.33 (d,  $J = 4.0$  Hz, 4H), 7.24 (d,  $J = 8.4$  Hz, 3H), 5.77 (s, 1H), 2.32 (br, 1H).  $^{13}\text{C NMR}$  (100 MHz,

$\text{CDCl}_3$ )  $\delta$  143.34, 142.70, 131.52, 128.63, 128.19, 127.85, 126.50, 121.39, 75.62.

### (S)-Phenyl(*o*-tolyl)methanol (3k)

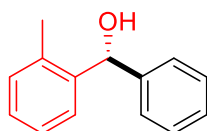

71% (28 mg) isolated yield, yellow oil,  $[\alpha]_{\text{D}}^{23} = -15.00$  ( $c = 1.00$  in  $\text{CH}_2\text{Cl}_2$ );

94% ee, determined by HPLC analysis (Chiralpak OB column, hexane/*i*-PrOH,

94:6 v/v, flow rate 1 mL/min,  $\lambda = 209.8$  nm, 25 °C), tR (major) = 14.91 min, tR

(minor) = 18.16 min;  $^1\text{H NMR}$  (400 MHz,  $\text{CDCl}_3$ )  $\delta$  7.51 (d,  $J = 7.2$  Hz, 1H), 7.32 (d,  $J = 4.4$  Hz, 4H),

7.28 – 7.18 (m, 3H), 7.14 (d,  $J = 7.6$  Hz, 1H), 6.00 (s, 1H), 2.24 (s, 3H), 2.15 (br, 1H).  $^{13}\text{C NMR}$  (100

MHz,  $\text{CDCl}_3$ )  $\delta$  142.82, 141.40, 135.34, 130.51, 128.45, 127.54, 127.50, 127.08, 126.23, 126.10,

73.34, 19.36.

### (S)-(3-Fluorophenyl)(phenyl)methanol (3l)

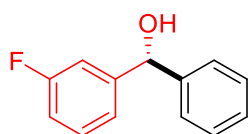

77% (31 mg) isolated yield, yellow oil,  $[\alpha]_{\text{D}}^{24} = -39.00$  ( $c = 1.00$  in  $\text{CH}_2\text{Cl}_2$ );

95% ee, determined by HPLC analysis (Chiralpak OB column,

hexane/*i*-PrOH, 80:20 v/v, flow rate 0.75 mL/min,  $\lambda = 209.8$  nm, 25 °C),

tR (major) = 11.01 min, tR (minor) = 12.00 min;  $^1\text{H NMR}$  (400 MHz,  $\text{CDCl}_3$ )  $\delta$  7.34 (d,  $J = 4.4$  Hz,

4H), 7.30 – 7.24 (m, 2H), 7.12 (t,  $J = 7.6$  Hz, 2H), 6.94 (t,  $J = 8.8$  Hz, 1H), 5.79 (s, 1H), 2.38 (br, 1H).

$^{13}\text{C NMR}$  (100 MHz,  $\text{CDCl}_3$ )  $\delta$  163.00 (d,  $J_{\text{C-F}} = 244.6$  Hz), 146.29 (d,  $J_{\text{C-F}} = 6.7$  Hz), 143.26, 129.92 (d,

$J_{\text{C-F}} = 8.1$  Hz), 128.63, 127.88, 126.54, 122.01 (d,  $J_{\text{C-F}} = 2.9$  Hz), 114.32 (d,  $J_{\text{C-F}} = 21.1$  Hz), 113.35 (d,

$J_{\text{C-F}} = 22.0$  Hz), 75.64 (d,  $J_{\text{C-F}} = 1.7$  Hz).  $^{19}\text{F NMR}$  (376 MHz,  $\text{CDCl}_3$ )  $\delta$  -112.75.

### (S)-(3-Chlorophenyl)(phenyl)methanol (3m)

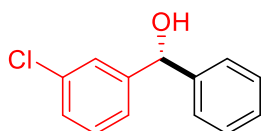

75% (33 mg) isolated yield, yellow oil,  $[\alpha]_D^{24} = -39.00$  ( $c = 1.00$  in  $\text{CH}_2\text{Cl}_2$ );

96% ee, determined by HPLC analysis (Chiralpak OB column,

hexane/*i*-PrOH, 90:10 v/v, flow rate 1 mL/min,  $\lambda = 209.8$  nm, 25 °C), tR

(major) = 16.21 min, tR (minor) = 25.75 min;  $^1\text{H NMR}$  (400 MHz,  $\text{CDCl}_3$ )  $\delta$  7.40 (s, 1H), 7.35 (d,  $J =$

4.4 Hz, 4H), 7.31 – 7.25 (m, 4H), 5.80 (s, 1H), 2.26 (br, 1H).  $^{13}\text{C NMR}$  (100 MHz,  $\text{DMSO-}d_6$ )  $\delta$

148.30, 145.04, 132.80, 130.03, 128.20, 126.96, 126.60, 126.21, 125.86, 124.87, 73.47.

### **(R)-(3,4-Dimethylphenyl)(phenyl)methanol (3n)**

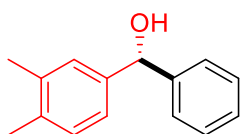

87% (37 mg) isolated yield, white solid,  $[\alpha]_D^{22} = 28.00$  ( $c = 1.00$  in  $\text{CH}_2\text{Cl}_2$ );

96% ee, determined by HPLC analysis (Chiralpak OB column,

hexane/*i*-PrOH, 80:20 v/v, flow rate 1 mL/min,  $\lambda = 209.8$  nm, 25 °C), tR

(major) = 7.52 min, tR (minor) = 11.14 min;  $^1\text{H NMR}$  (400 MHz,  $\text{CDCl}_3$ )  $\delta$  7.37 (d,  $J = 7.2$  Hz, 2H),

7.32 (t,  $J = 7.2$  Hz, 2H), 7.26 – 7.23 (m, 1H), 7.13 (s, 1H), 7.08 (s, 2H), 5.76 (s, 1H), 2.23 (s, 7H).  $^{13}\text{C}$

**NMR** (100 MHz,  $\text{CDCl}_3$ )  $\delta$  143.97, 141.38, 136.70, 135.92, 129.69, 128.39, 127.78, 127.35, 126.38,

123.96, 76.08, 19.82, 19.42.

### **(R)-(3,4-Dimethoxyphenyl)(phenyl)methanol (3o)**

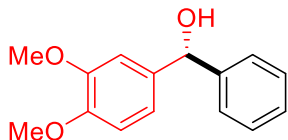

84% (41 mg) isolated yield, white solid,  $[\alpha]_D^{23} = 6.00$  ( $c = 1.00$  in

$\text{CH}_2\text{Cl}_2$ ); 95% ee, determined by HPLC analysis (Chiralpak OB column,

hexane/*i*-PrOH, 60:40 v/v, flow rate 1 mL/min,  $\lambda = 215.0$  nm, 25 °C),

tR (major) = 11.24 min, tR (minor) = 19.37 min;  $^1\text{H NMR}$  (400 MHz,  $\text{CDCl}_3$ )  $\delta$  7.37 – 7.31 (m, 3H),

7.25 (t,  $J = 8.0$  Hz, 1H), 6.91 – 6.80 (m, 3H), 5.77 (s, 1H), 3.85 (s, 3H), 3.83 (s, 3H), 2.35 (br, 1H).  $^{13}\text{C}$

**NMR** (100 MHz,  $\text{CDCl}_3$ )  $\delta$  149.00, 148.42, 143.84, 136.51, 128.39, 127.44, 126.37, 118.91, 110.90,

109.75, 75.92, 55.86, 55.79.

### **(R)-Naphthalen-2-yl(phenyl)methanol (3p)**

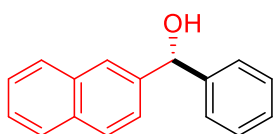

79% (37 mg) isolated yield, white solid,  $[\alpha]_D^{25} = -2.50$  ( $c = 0.80$  in

$\text{CH}_2\text{Cl}_2$ ); 94% ee, determined by HPLC analysis (Chiralpak OB column,

hexane/*i*-PrOH, 85:15 v/v, flow rate 1 mL/min,  $\lambda = 234.6$  nm, 25 °C), tR (major) = 15.62 min, tR

(minor) = 15.04 min;  $^1\text{H NMR}$  (400 MHz,  $\text{CDCl}_3$ )  $\delta$  7.88 (s, 1H), 7.84 – 7.77 (m, 3H), 7.48 – 7.45 (m,

2H), 7.43 – 7.40 (m, 3H), 7.33 (t,  $J = 7.2$  Hz, 2H), 7.28 – 7.24 (m, 1H), 5.98 (s, 1H), 2.36 (br, 1H).  $^{13}\text{C}$

**NMR** (100 MHz,  $\text{CDCl}_3$ )  $\delta$  143.62, 141.10, 133.23, 132.86, 128.53, 128.31, 128.05, 127.66, 126.69,

126.17, 125.95, 125.00, 124.75, 76.36.

### (R)-Benzofuran-5-yl(phenyl)methanol (3q)

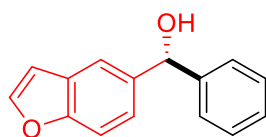

87% (39 mg) isolated yield, white solid,  $[\alpha]_D^{24} = 13.00$  ( $c = 1.00$  in  $\text{CH}_2\text{Cl}_2$ ); 95% ee, determined by HPLC analysis (Chiralpak OD-H column, hexane/*i*-PrOH, 95:5 v/v, flow rate 1 mL/min,  $\lambda = 254$  nm, 25 °C), tR (major) = 22.47 min, tR (minor) = 20.60 min;  $^1\text{H NMR}$  (400 MHz,  $\text{CDCl}_3$ )  $\delta$  7.60 (d,  $J = 2.0$  Hz, 2H), 7.45 – 7.23 (m, 7H), 6.72 (d,  $J = 1.6$  Hz, 1H), 5.92 (s, 1H), 2.39 (br, 1H).  $^{13}\text{C NMR}$  (100 MHz,  $\text{CDCl}_3$ )  $\delta$  154.36, 145.46, 144.07, 138.63, 128.43, 127.45, 126.43, 123.23, 119.22, 111.34, 106.68, 76.28.

### (S)-Phenyl(thiophen-2-yl)methanol (3r)

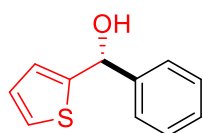

81% (31 mg) isolated yield, yellow oil,  $[\alpha]_D^{24} = -7.00$  ( $c = 1.00$  in  $\text{CH}_2\text{Cl}_2$ ); 98% ee, determined by HPLC analysis (Chiralpak OB column, hexane/*i*-PrOH, 80:20 v/v, flow rate 1 mL/min,  $\lambda = 209.8$  nm, 25 °C), tR (major) = 9.51 min, tR (minor) = 8.74 min;  $^1\text{H NMR}$  (400 MHz,  $\text{CDCl}_3$ )  $\delta$  7.45 (d,  $J = 7.2$  Hz, 2H), 7.37 (t,  $J = 7.2$  Hz, 2H), 7.32 – 7.29 (m, 1H), 7.26 – 7.25 (m, 1H), 6.95 – 6.93 (m, 1H), 6.88 (d,  $J = 3.6$  Hz, 1H), 6.05 (s, 1H), 2.43 (br, 1H).  $^{13}\text{C NMR}$  (100 MHz,  $\text{CDCl}_3$ )  $\delta$  148.09, 143.08, 128.51, 127.98, 126.63, 126.27, 125.39, 124.87, 72.40. HRMS (ESI)  $m/z$  calcd for  $\text{C}_{11}\text{H}_{10}\text{NaOS}$  [ $\text{M} + \text{Na}$ ] $^+$  213.0345, found 213.0338.

### (R)-(4-Methoxyphenyl)(*p*-tolyl)methanol (3s)

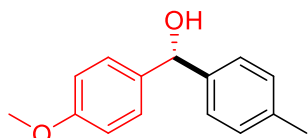

90% (41 mg) isolated yield, white solid,  $[\alpha]_D^{25} = 11.00$  ( $c = 1.00$  in  $\text{CH}_2\text{Cl}_2$ ); 92% ee, determined by HPLC analysis (Chiralpak OJ column, hexane/*i*-PrOH, 95:5 v/v, flow rate 1 mL/min,  $\lambda = 238.6$  nm, 25 °C), tR (major) = 45.11 min, tR (minor) = 53.00 min;  $^1\text{H NMR}$  (400 MHz,  $\text{CDCl}_3$ )  $\delta$  7.25 (t,  $J = 8.8$  Hz, 4H), 7.13 (d,  $J = 8.0$  Hz, 2H), 6.84 (d,  $J = 8.8$  Hz, 2H), 5.75 (s, 1H), 3.77 (s, 3H), 2.32 (s, 3H), 2.23 (br, 1H).  $^{13}\text{C NMR}$  (100 MHz,  $\text{CDCl}_3$ )  $\delta$  158.92, 141.14, 137.05, 136.31, 129.08, 127.77, 126.34, 113.79, 75.60, 55.23, 21.06.

### (R)-(4-(Tert-butyl)phenyl)(4-methoxyphenyl)methanol (3t)

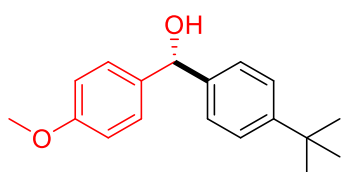

94% (51 mg) isolated yield, white solid,  $[\alpha]_D^{25} = 9.00$  ( $c = 1.00$  in  $\text{CH}_2\text{Cl}_2$ ); 92% ee, determined by HPLC analysis (Chiralpak IC column, hexane/*i*-PrOH, 95:5 v/v, flow rate 1 mL/min,  $\lambda = 231.0$  nm, 25 °C), tR (major) = 14.00 min, tR (minor) = 19.00 min;  $^1\text{H NMR}$  (400 MHz,  $\text{CDCl}_3$ )  $\delta$  7.34 (d,  $J = 8.4$  Hz, 2H), 7.29 – 7.26 (m, 4H), 6.85 (d,  $J = 8.8$  Hz, 2H), 5.75

(s, 1H), 3.77 (s, 3H), 2.26 (br, 1H), 1.30 (s, 9H).  $^{13}\text{C}$  NMR (100 MHz,  $\text{CDCl}_3$ )  $\delta$  158.90, 150.30, 141.08, 136.22, 127.77, 126.11, 125.32, 113.76, 75.58, 55.22, 34.45, 31.31.

### **(R)-(4-chlorophenyl)(4-methoxyphenyl)methanol (3u)**

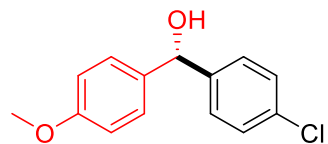

96% (48 mg) isolated yield, white solid,  $[\alpha]_{\text{D}}^{25} = 42.00$  ( $c = 1.00$  in  $\text{CH}_2\text{Cl}_2$ ); 94% ee, determined by HPLC analysis (Chiralpak OB column, hexane/*i*-PrOH, 90:10 v/v, flow rate 1 mL/min,  $\lambda = 209.8$

nm, 25 °C),  $t_{\text{R}}$  (major) = 28.76 min,  $t_{\text{R}}$  (minor) = 26.33 min;  $^1\text{H}$  NMR (400 MHz,  $\text{CDCl}_3$ )  $\delta$  7.29 (s, 4H), 7.23 (d,  $J = 8.8$  Hz, 2H), 6.85 (d,  $J = 8.4$  Hz, 2H), 5.74 (s, 1H), 3.78 (s, 3H), 2.30 (br, 1H).  $^{13}\text{C}$  NMR (100 MHz,  $\text{CDCl}_3$ )  $\delta$  159.20, 142.42, 135.75, 133.06, 128.49, 127.88, 127.72, 113.97, 75.13, 55.26.

### **(R)-(4-Bromophenyl)(4-methoxyphenyl)methanol (3v)**

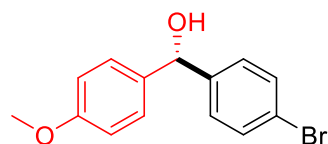

96% (56 mg) isolated yield, white solid,  $[\alpha]_{\text{D}}^{25} = 30.00$  ( $c = 1.00$  in  $\text{CH}_2\text{Cl}_2$ ); 94% ee, determined by HPLC analysis (Chiralpak OB column, hexane/*i*-PrOH, 90:10 v/v, flow rate 1 mL/min,  $\lambda = 209.8$

nm, 25 °C),  $t_{\text{R}}$  (major) = 28.76 min,  $t_{\text{R}}$  (minor) = 26.33 min;  $^1\text{H}$  NMR (400 MHz,  $\text{CDCl}_3$ )  $\delta$  7.44 (d,  $J = 8.4$  Hz, 2H), 7.23 (d,  $J = 8.4$  Hz, 4H), 6.85 (d,  $J = 8.8$  Hz, 2H), 5.72 (s, 1H), 3.78 (s, 3H), 2.31 (br, 1H).  $^{13}\text{C}$  NMR (100 MHz,  $\text{CDCl}_3$ )  $\delta$  159.19, 142.92, 135.66, 131.42, 128.06, 127.89, 121.19, 113.97, 75.15, 55.26.

### **(R)-(4-Methoxyphenyl)(*o*-tolyl)methanol (3w)**

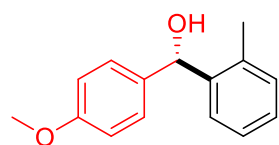

61% (28 mg) isolated yield, yellow oil,  $[\alpha]_{\text{D}}^{25} = 15.00$  ( $c = 1.00$  in  $\text{CH}_2\text{Cl}_2$ ); 84% ee, determined by HPLC analysis (Chiralpak IC column, hexane/*i*-PrOH, 95:5 v/v, flow rate 1 mL/min,  $\lambda = 237.1$  nm, 25 °C),  $t_{\text{R}}$

(major) = 13.13 min,  $t_{\text{R}}$  (minor) = 16.26 min;  $^1\text{H}$  NMR (400 MHz,  $\text{CDCl}_3$ )  $\delta$  7.56 (d,  $J = 7.2$  Hz, 1H), 7.27 – 7.11 (m, 5H), 6.84 (d,  $J = 8.8$  Hz, 2H), 5.93 (s, 1H), 3.77 (s, 3H), 2.20 (s, 3H), 2.15 (br, 1H).  $^{13}\text{C}$  NMR (100 MHz,  $\text{CDCl}_3$ )  $\delta$  159.00, 141.58, 135.14, 135.04, 130.44, 128.47, 127.34, 126.04, 125.85, 113.81, 72.91, 55.23, 19.31.

### **(R)-(4-Methoxyphenyl)(*m*-tolyl)methanol (3x)**

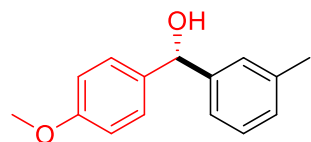

88% (40 mg) isolated yield, yellow oil,  $[\alpha]_{\text{D}}^{25} = 16.00$  ( $c = 1.00$  in  $\text{CH}_2\text{Cl}_2$ ); 94% ee, determined by HPLC analysis (Chiralpak IC column,

hexane/*i*-PrOH, 95:5 v/v, flow rate 1 mL/min,  $\lambda = 209.8$  nm, 25 °C), tR (major) = 17.91 min, tR (minor) = 20.05 min;  $^1\text{H NMR}$  (400 MHz,  $\text{CDCl}_3$ )  $\delta$  7.27 (d,  $J = 8.4$  Hz, 2H), 7.21 – 7.13 (m, 3H), 7.06 (d,  $J = 7.2$  Hz, 1H), 6.85 (d,  $J = 8.8$  Hz, 2H), 5.74 (s, 1H), 3.77 (s, 3H), 2.32 (s, 4H).  $^{13}\text{C NMR}$  (100 MHz,  $\text{CDCl}_3$ )  $\delta$  158.92, 143.95, 138.05, 136.20, 128.29, 128.15, 127.82, 127.00, 123.43, 113.79, 75.76, 55.22, 21.44.

### **(*R*)-(3-Chlorophenyl)(4-methoxyphenyl)methanol (3y)**

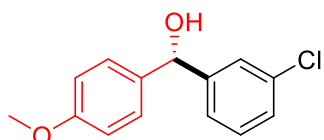

94% (47 mg) isolated yield, colorless oil,  $[\alpha]_{\text{D}}^{25} = 53.00$  ( $c = 1.00$  in  $\text{CH}_2\text{Cl}_2$ ); 97% ee, determined by HPLC analysis (Chiralpak OB column, hexane/*i*-PrOH, 85:15 v/v, flow rate 1 mL/min,  $\lambda = 248.6$  nm, 25 °C), tR (major) = 19.55 min, tR (minor) = 17.36 min;  $^1\text{H NMR}$  (400 MHz,  $\text{CDCl}_3$ )  $\delta$  7.37 (s, 1H), 7.25 – 7.21 (m, 5H), 6.87 – 6.84 (m, 2H), 5.72 (s, 1H), 3.78 (s, 3H), 2.39 (br, 1H).  $^{13}\text{C NMR}$  (100 MHz,  $\text{CDCl}_3$ )  $\delta$  159.21, 145.96, 135.51, 134.27, 129.63, 127.93, 127.43, 126.41, 124.46, 113.98, 75.15, 55.24.

### **(*R*)-3-(Hydroxy(4-methoxyphenyl)methyl)benzonitrile (3z)**

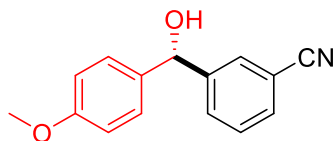

81% (39 mg) isolated yield, colorless oil,  $[\alpha]_{\text{D}}^{25} = 78.00$  ( $c = 1.00$  in  $\text{CH}_2\text{Cl}_2$ ); 93% ee, determined by HPLC analysis (Chiralpak IC column, hexane/*i*-PrOH, 90:10 v/v, flow rate 1 mL/min,  $\lambda = 254$  nm, 25 °C), tR (major) = 25.26 min, tR (minor) = 23.13 min;  $^1\text{H NMR}$  (400 MHz,  $\text{CDCl}_3$ )  $\delta$  7.69 (s, 1H), 7.60 (d,  $J = 8.0$  Hz, 1H), 7.53 (d,  $J = 7.6$  Hz, 1H), 7.42 (t,  $J = 7.6$  Hz, 1H), 7.23 (d,  $J = 8.8$  Hz, 2H), 6.90 – 6.86 (m, 2H), 5.79 (s, 1H), 3.79 (s, 3H), 2.51 (br, 1H).  $^{13}\text{C NMR}$  (100 MHz,  $\text{CDCl}_3$ )  $\delta$  159.45, 145.37, 135.09, 130.88, 130.76, 129.85, 129.07, 128.00, 118.85, 114.18, 112.28, 74.80, 55.28.

### **(*R*)-(3,5-Dimethylphenyl)(4-methoxyphenyl)methanol (3aa)**

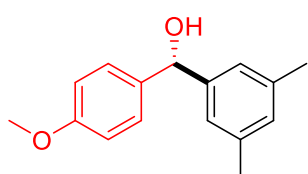

87% (42 mg) isolated yield, white solid,  $[\alpha]_{\text{D}}^{25} = 14.00$  ( $c = 1.00$  in  $\text{CH}_2\text{Cl}_2$ ); 94% ee, determined by HPLC analysis (Chiralpak OB column, hexane/*i*-PrOH, 80:20 v/v, flow rate 1 mL/min,  $\lambda = 237.0$  nm, 25 °C), tR (major) = 12.33 min, tR (minor) = 8.30 min;  $^1\text{H NMR}$  (400 MHz,  $\text{CDCl}_3$ )  $\delta$  7.26 (d,  $J = 8.8$  Hz, 2H), 6.96 (s, 2H), 6.88 – 6.83 (m, 3H), 5.69 (s, 1H), 3.76 (s, 3H), 2.28 (s, 7H).  $^{13}\text{C NMR}$  (100 MHz,  $\text{CDCl}_3$ )  $\delta$  158.86, 143.96, 137.92, 136.26, 129.03, 127.77, 124.12, 113.74, 75.76, 55.19, 21.30. HRMS (ESI):  $m/z$  calcd for  $\text{C}_{16}\text{H}_{18}\text{NaO}_2$   $[\text{M} + \text{Na}]^+$  265.1199, found 265.1194.

### **(*R*)-(3,5-Dimethoxyphenyl)(4-methoxyphenyl)methanol (3ab)**

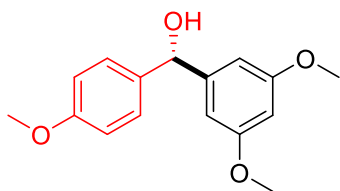

91% (50 mg) isolated yield, yellow oil,  $[\alpha]_D^{25} = 29.00$  ( $c = 1.00$  in  $\text{CH}_2\text{Cl}_2$ ); 94% ee, determined by HPLC analysis (Chiralpak IC column, hexane/*i*-PrOH, 80:20 v/v, flow rate 1 mL/min,  $\lambda = 254$  nm, 25 °C), tR (major) = 13.30 min, tR (minor) = 22.22 min;  $^1\text{H}$

**NMR** (400 MHz,  $\text{CDCl}_3$ )  $\delta$  7.27 (d,  $J = 8.8$  Hz, 2H), 6.84 (d,  $J = 8.8$  Hz, 2H), 6.53 (d,  $J = 2.0$  Hz, 2H), 6.36 – 6.34 (m, 1H), 5.69 (s, 1H), 3.77 (s, 3H), 3.75 (s, 6H), 2.31 (br, 1H).  $^{13}\text{C}$  **NMR** (100 MHz,  $\text{CDCl}_3$ )  $\delta$  160.77, 159.01, 146.51, 135.85, 127.84, 113.81, 104.32, 99.24, 75.71, 55.27, 55.22.

**(R)-(3,4-Difluorophenyl)(4-methoxyphenyl)methanol (3ac)**

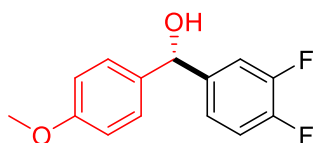

90% (45 mg) isolated yield, colorless oil,  $[\alpha]_D^{25} = 51.00$  ( $c = 1.00$  in  $\text{CH}_2\text{Cl}_2$ ); 96% ee, determined by HPLC analysis (Chiralpak OJ column, hexane/*i*-PrOH, 95:5 v/v, flow rate 1 mL/min,  $\lambda = 235.0$  nm, 25 °C),

tR (major) = 53.38 min, tR (minor) = 50.69 min;  $^1\text{H}$  **NMR** (400 MHz,  $\text{CDCl}_3$ )  $\delta$  7.25 – 7.16 (m, 3H), 7.12 – 7.03 (m, 2H), 6.86 (d,  $J = 8.4$  Hz, 2H), 5.71 (s, 1H), 3.78 (s, 3H), 2.41 (br, 1H).  $^{13}\text{C}$  **NMR** (100 MHz,  $\text{CDCl}_3$ )  $\delta$  159.31, 151.06 (dd,  $J_{\text{C-F}} = 74.7, 12.8$  Hz), 148.60 (dd,  $J_{\text{C-F}} = 74.1, 12.7$  Hz), 140.98 (t,  $J_{\text{C-F}} = 4.7$  Hz), 135.42, 127.87, 122.20 (dd,  $J_{\text{C-F}} = 6.3, 3.5$  Hz), 116.99 (d,  $J_{\text{C-F}} = 17.1$  Hz), 115.32 (d,  $J_{\text{C-F}} = 17.8$  Hz), 114.04, 74.68 (d,  $J_{\text{C-F}} = 1.2$  Hz), 55.25.  $^{19}\text{F}$  **NMR** (376 MHz,  $\text{CDCl}_3$ )  $\delta$  -137.51 (d,  $J = 21.1$  Hz), -140.01 (d,  $J = 21.4$  Hz).

**(R)-(4-Methoxyphenyl)(3,4,5-trifluorophenyl)methanol (3ac)**

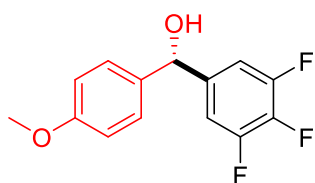

86% (46 mg) isolated yield, colorless oil,  $[\alpha]_D^{25} = 66.00$  ( $c = 1.00$  in  $\text{CH}_2\text{Cl}_2$ ); 96% ee, determined by HPLC analysis (Chiralpak OJ column, hexane/*i*-PrOH, 90:10 v/v, flow rate 1 mL/min,  $\lambda = 209.8$  nm, 25 °C),

tR (major) = 13.20 min, tR (minor) = 11.34 min;  $^1\text{H}$  **NMR** (400 MHz,  $\text{CDCl}_3$ )  $\delta$  7.23 – 7.19 (m, 2H), 7.00 – 6.97 (m, 2H), 6.89 – 6.86 (m, 2H), 5.68 (s, 1H), 3.79 (s, 3H), 2.37 (br, 1H).  $^{13}\text{C}$  **NMR** (100 MHz,  $\text{CDCl}_3$ )  $\delta$  159.57, 151.11 (ddd,  $J_{\text{C-F}} = 248.4, 10.0, 3.9$  Hz), 140.27 – 139.80 (m), 137.46 (t,  $J_{\text{C-F}} = 15.2$  Hz), 134.84, 127.96, 114.21, 110.24 (dd,  $J_{\text{C-F}} = 16.0, 5.9$  Hz), 74.44, 55.29.  $^{19}\text{F}$  **NMR** (376 MHz,  $\text{CDCl}_3$ )  $\delta$  -134.06 (d,  $J = 20.3$  Hz), -162.41 (t,  $J = 20.7$  Hz).

## 4. Radical Trapping Experiments

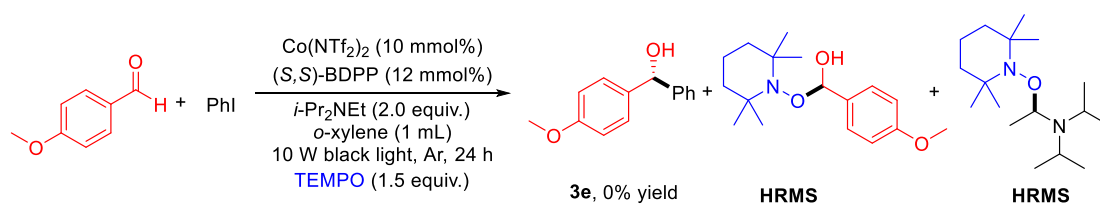

In an argon-filled glovebox, a 10 mL flame-dried quartz tube with magnetic stirring was charged sequentially with Co(NTf<sub>2</sub>)<sub>2</sub> (0.02 mmol, 10 mol%), **L1** (0.024 mmol, 12 mol%) and *o*-xylene (1 mL). After stirring at room temperature for 2 h, *p*-anisaldehyde (0.2 mmol) and iodobenzene (0.3 mmol), *i*-Pr<sub>2</sub>NEt (0.4 mmol, 2.0 eq.) and TEMPO (1.5eq, 0.3 mmol) were sequentially added into the quartz tube. Then, the quartz tube was removed from glovebox. The mixture was stirred at room temperature under 10 W black LEDs for 24 h. The reductive coupling of *p*-anisaldehyde and iodobenzene was inhibited completely by the addition of 1.5 equiv. of 2,2,6,6-tetramethylpiperidinoxy (TEMPO) as a radical scavenger. Moreover, the ketyl radical addition product and  $\alpha$ -amino radical addition product were detected by HRMS. HRMS (ESI) of ketyl radical addition product:  $m/z$  calcd for C<sub>17</sub>H<sub>28</sub>NO<sub>3</sub> [M + H]<sup>+</sup> 294.2064, found 294.2073. HRMS (ESI) of  $\alpha$ -amino radical addition:  $m/z$  calcd for C<sub>17</sub>H<sub>37</sub>N<sub>2</sub>O [M + H]<sup>+</sup> 285.2900, found 285.2894.

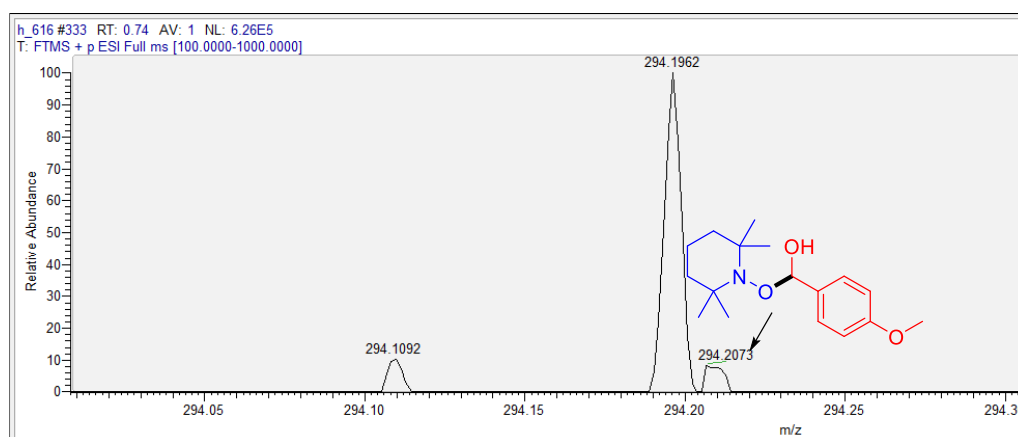

HRMS (ESI) of ketyl radical addition product

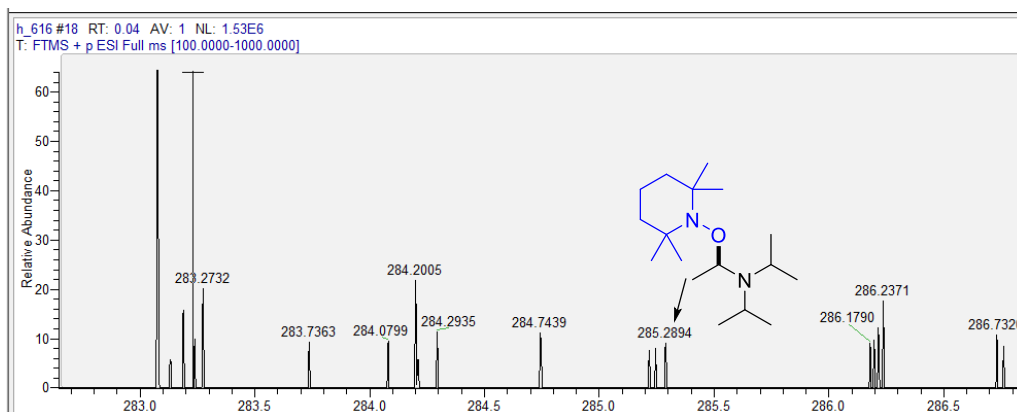

HRMS (ESI) of  $\alpha$ -amino radical addition

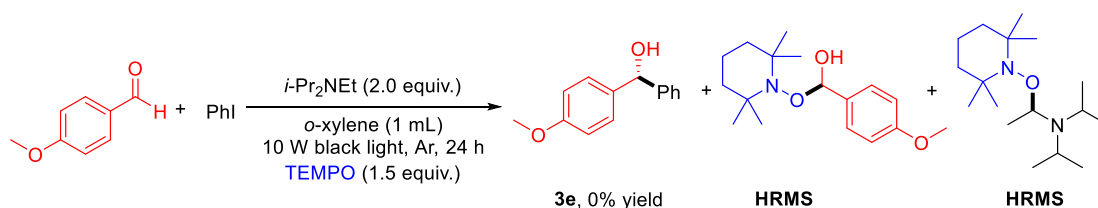

In an argon-filled glovebox, a 10 mL flame-dried quartz tube with magnetic stirring was charged sequentially with *p*-anisaldehyde (0.2 mmol), iodobenzene (0.3 mmol), *i*-Pr<sub>2</sub>NEt (0.4 mmol, 2.0 eq.), TEMPO (1.5eq, 0.3 mmol) and *o*-xylene (1 mL). Then, the quartz tube was removed from glovebox. The mixture was stirred at room temperature under 10 W black LEDs for 24 h. This indicated that the generation of ketyl radical and  $\alpha$ -amino radical was not affected by the cobalt catalyst and ligand. The ketyl radical addition product and  $\alpha$ -amino radical addition product was detected by HRMS. HRMS (ESI) of ketyl radical addition product:  $m/z$  calcd for C<sub>17</sub>H<sub>27</sub>NO<sub>3</sub>Na [M + Na]<sup>+</sup> 316.1883, found 316.1875. HRMS (ESI) of  $\alpha$ -amino radical addition product:  $m/z$  calcd for C<sub>17</sub>H<sub>27</sub>N<sub>2</sub>O [M + H]<sup>+</sup> 285.2900, found 285.2896.

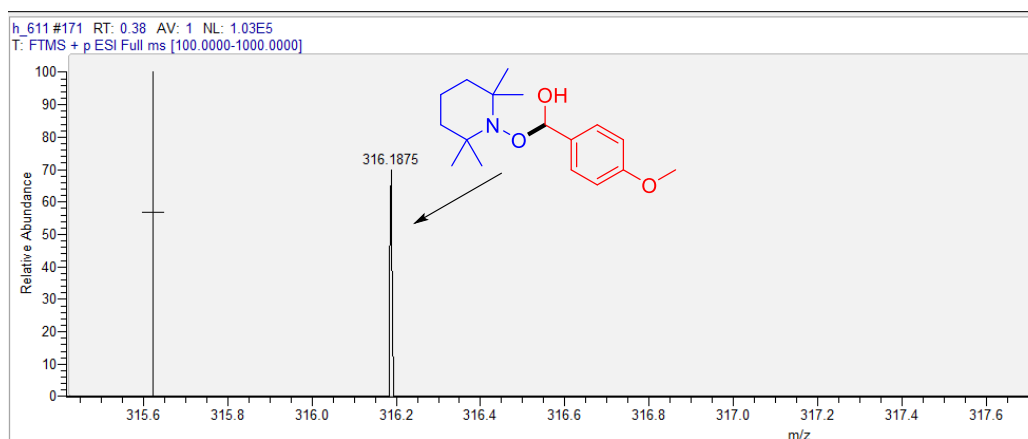

HRMS (ESI) of ketyl radical addition product



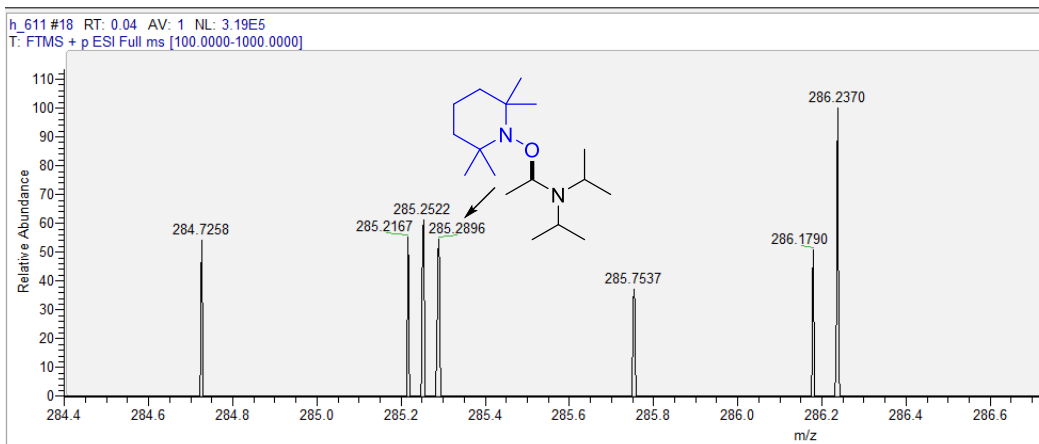

HRMS (ESI) of  $\alpha$ -amino radical addition

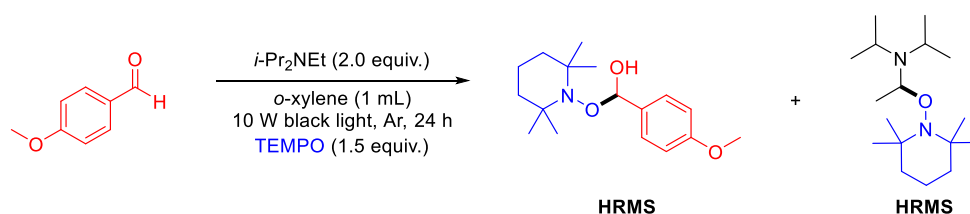

In an argon-filled glovebox, a 10 mL flame-dried quartz tube with magnetic stirring was charged sequentially with *p*-anisaldehyde (0.2 mmol), *i*-Pr<sub>2</sub>NEt (0.4 mmol, 2.0 eq.), TEMPO (1.5eq, 0.3 mmol) and *o*-xylene (1 mL). Then, the quartz tube was removed from glovebox. The mixture was stirred at room temperature under 10 W black LEDs for 24 h. This result suggest that irradiation of a mixture of *p*-anisaldehyde and *i*-Pr<sub>2</sub>NEt leads to ketyl radical through a process of the traditional photoinduced sequential electron transfer and proton transfer. The ketyl radical addition product and  $\alpha$ -amino radical addition product was detected by HRMS. HRMS (ESI) of ketyl radical addition product:  $m/z$  calcd for C<sub>17</sub>H<sub>27</sub>NO<sub>3</sub>Na [M + Na]<sup>+</sup> 316.1883, found 316.1885. HRMS (ESI) of  $\alpha$ -amino radical addition product:  $m/z$  calcd for C<sub>17</sub>H<sub>37</sub>N<sub>2</sub>O [M + H]<sup>+</sup> 285.2900, found 285.2897.

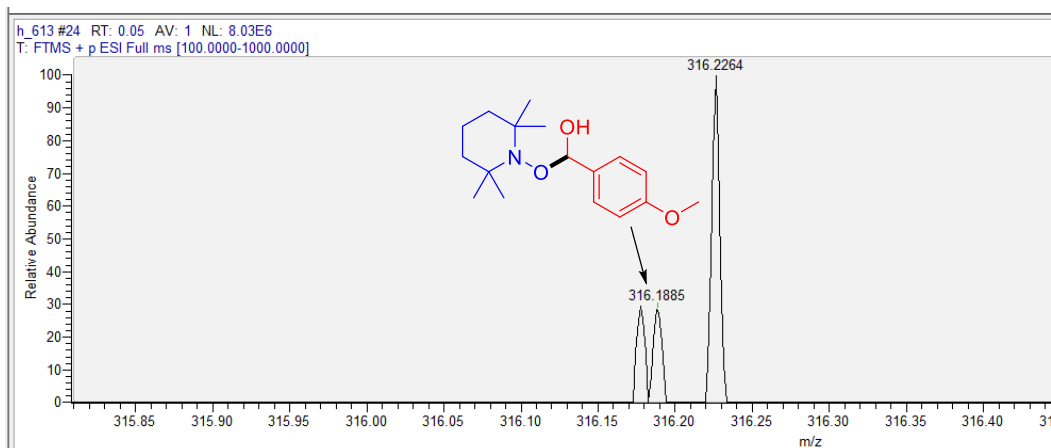

HRMS (ESI) of ketyl radical addition product

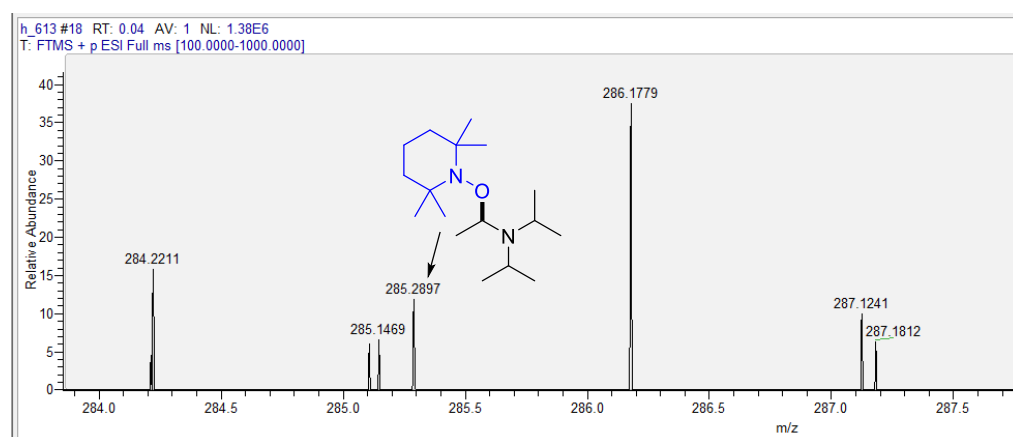

HRMS (ESI) of  $\alpha$ -amino radical addition

## 5. Secondary isotope effect

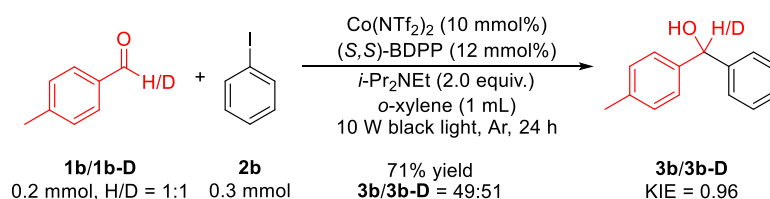

In an argon-filled glovebox, a 10 mL flame-dried quartz tube with magnetic stirring was charged sequentially with  $\text{Co(NTf}_2)_2$  (0.02 mmol, 10 mol%), **L1** (0.024 mmol, 12 mol%) and *o*-xylene (1 mL). After stirring at room temperature for 2 h, substrates **1b** (0.1 mmol), **1b-D** (0.1 mmol), **2** (0.3 mmol) and *i*- $\text{Pr}_2\text{NEt}$  (0.4 mmol, 2.0 eq.) were sequentially added into the quartz tube. Then, the quartz tube was removed from glovebox. The mixture was stirred at room temperature under 10 W black LEDs until the reaction was completed, as monitored by TLC analysis. The reaction mixture was then concentrated in vacuo. The crude product was purified by flash column

chromatography (silica gel, PE/EA) to afford the desired product.

## 6. UV-vis studies

### 6.1 UV-vis Absorption Spectrum of cobalt catalytic system

Curve a: in an argon-filled glovebox, a flame-dried glass tube with magnetic stirring was charged sequentially with  $\text{Co}(\text{NTf}_2)_2$  (0.1 mmol, 62 mg), (*S,S*)-BDPP (0.12 mmol, 53 mg) and MeCN (10 mL). After stirring at room temperature for 2 h, the glass tube was placed in the UV-Vis and a wavelength scan from 800 nm to 300 nm.

Curve b: in an argon-filled glovebox, a flame-dried glass tube with magnetic stirring was charged sequentially with  $\text{Co}(\text{NTf}_2)_2$  (0.1 mmol, 62 mg), (*S,S*)-BDPP (0.12 mmol, 53 mg) and MeCN (10 mL). After stirring at room temperature for 2 h, *i*-Pr<sub>2</sub>NEt (2.0 mmol, 348  $\mu\text{L}$ ) was added into the glass tube. Then, this solution was allowed to stir for 8 h inside the glovebox. Finally, the glass tube was placed in the UV-Vis and a wavelength scan from 800 nm to 300 nm.

Curve c: in an argon-filled glovebox, a flame-dried glass tube with magnetic stirring was charged sequentially with  $\text{Co}(\text{NTf}_2)_2$  (0.1 mmol, 62 mg), (*S,S*)-BDPP (0.12 mmol, 53 mg) and MeCN (10 mL). After stirring at room temperature for 2 h, *i*-Pr<sub>2</sub>NEt (2.0 mmol, 348  $\mu\text{L}$ ) was added into the glass tube. Then, this solution was allowed to stir for 8 h inside the glovebox. Afterward, *p*-anisaldehyde (0.1 mmol, 12  $\mu\text{L}$ ) was added into this solution. Finally, the glass tube was placed in the UV-Vis and a wavelength scan from 800 nm to 300 nm.

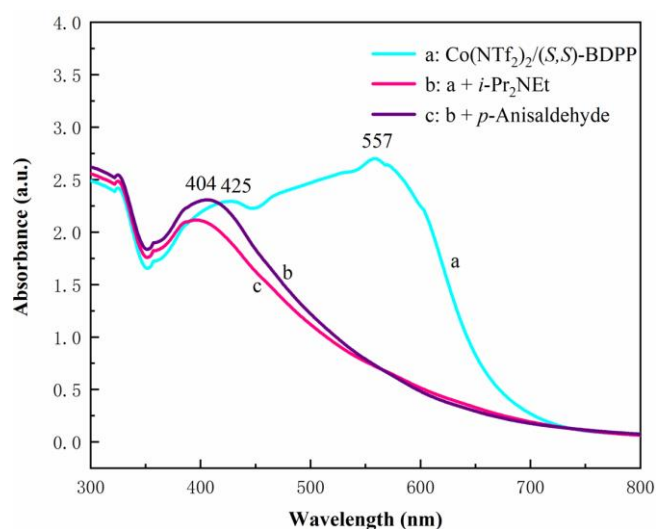

**Figure S1.** UV-vis absorption spectrum of a, b and c in MeCN ( $10^{-2}$  mmol/mL)

## 6.2 UV-vis Absorption Spectrum of *p*-Anisaldehyde and *i*-Pr<sub>2</sub>NEt

In a glass tube, *p*-anisaldehyde (0.1 mmol, 12 μL), *i*-Pr<sub>2</sub>NEt (0.1 mmol, 18 μL) and its mixture into EtOH (10 mL). The glass tube was placed in the UV-Vis and a wavelength scan from 380 nm to 340 nm.

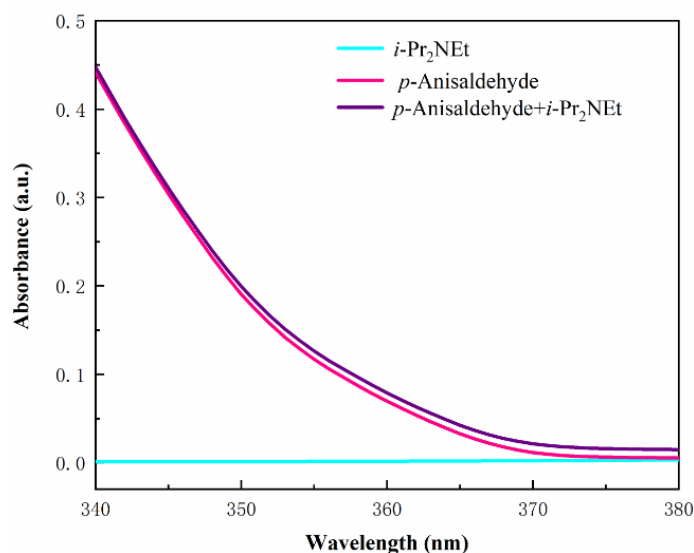

Figure S2. UV-vis absorption spectrum of *p*-Anisaldehyde, *i*-Pr<sub>2</sub>NEt in EtOH (10<sup>-2</sup> mmol/mL)

## 7. Comparison with previous work

Table S9. Comparison of this work with previous work

|                  | Reaction                                                                                                                                                                                                                                                                                                     | enantiosel<br>activity | reductant                     | additives                     | reference                                                    |
|------------------|--------------------------------------------------------------------------------------------------------------------------------------------------------------------------------------------------------------------------------------------------------------------------------------------------------------|------------------------|-------------------------------|-------------------------------|--------------------------------------------------------------|
| Previous<br>work | $\text{Ar-I} + \text{R-C(=O)-H} \xrightarrow[\text{1-phenylethanol (3 equiv.) PhMe, 16 h, 0.2 M, 75 }^\circ\text{C}]{\text{NiBr}_2 \cdot \text{diglyme (5 mol\%)} \text{ (P}^\text{O}^\text{N}^\text{Ar}^\text{CF}_3)_2 \text{ (12 mol\%)} \text{ TMP (2 equiv.)}}$ $\text{Ar-CH(OH)-R}$                     | No                     | 1-phenyle<br>thanol           | TMP                           | <i>J. Am. Chem. Soc.</i> , 2021, <b>143</b> , 14646–14656.   |
|                  | $\text{Ar-I} + \text{R-C(=O)-H} \xrightarrow[\text{THF, -10 }^\circ\text{C, 48 h}]{\text{NiBr}_2(\text{dne}) \text{ (10 mol\%)} \text{ L (10 mol\%)} \text{ NaI (2 equiv.)} \text{ Zn (2 equiv.)}}$ 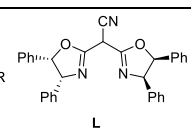 $\text{Ar-CH(OH)-R}$ | Yes                    | Zn                            | NaI                           | <i>Angew. Chem. Int. Ed.</i> , 2022, <b>61</b> , e202201370. |
|                  | $\text{Ar-I} + \text{R-C(=O)-H} \xrightarrow[\text{2-MeTHF, 24 h, -30 }^\circ\text{C}]{\text{NiBr}_2 \cdot \text{diglyme (10 mol\%)} \text{ (+)-Ph-SBpy (12 mol\%)} \text{ Zn (1.5 equiv.)} \text{ TBABPh}_4 \text{ (25 mol\%)}}$ $\text{Ar-CH(OH)-R}$                                                       | Yes                    | Zn                            | TBABPh <sub>4</sub>           | <i>Angew. Chem. Int. Ed.</i> , 2022, <b>61</b> , e202117843. |
|                  | $\text{Ar-I} + \text{R-C(=O)-H} \xrightarrow[\text{DCM or THE, blue LEDs}]{\text{4CzIPN (2 mol\%)} \text{ CoI}_2 \text{ (10 mol\%)} \text{ (S,S)-BDPP (12 mol\%)} \text{ HE (1.4 equiv.)} \text{ } i\text{-Pr}_2\text{NEt (2.0 equiv.)}}$ $\text{Ar-CH(OH)-R}$                                               | Yes                    | HE                            | <i>i</i> -Pr <sub>2</sub> NEt | <i>J. Am. Chem. Soc.</i> , 2022, <b>144</b> , 8347–8354.     |
| This Work        |                                                                                                                                                                                                                           | Yes                    | <i>i</i> -Pr <sub>2</sub> NEt | No                            |                                                              |

## 8. References

- (1) W. L. F. Armarego and C. C. L. Chai, *Purification of Laboratory Chemicals*, 5th ed., Butterworth-Heinemann, **2003**.
- (2) J. Chen, S. Yang, Z. Chen, C. Song and Y. Ma, *Tetrahedron: Asymmetry*, 2015, **26**, 288–385.
- (3) X. Jiang, H. Jiang, Q. Yang, Y. Cheng, L.-Q. Lu, J. Tunge and W.-J. Xiao, *J. Am. Chem. Soc.*, 2022, **144**, 8347–8354.

## 9. Copies of NMR Spectra for the Products

$^1\text{H}$  NMR spectrum of compound **3a** (400 MHz) in  $\text{CDCl}_3$

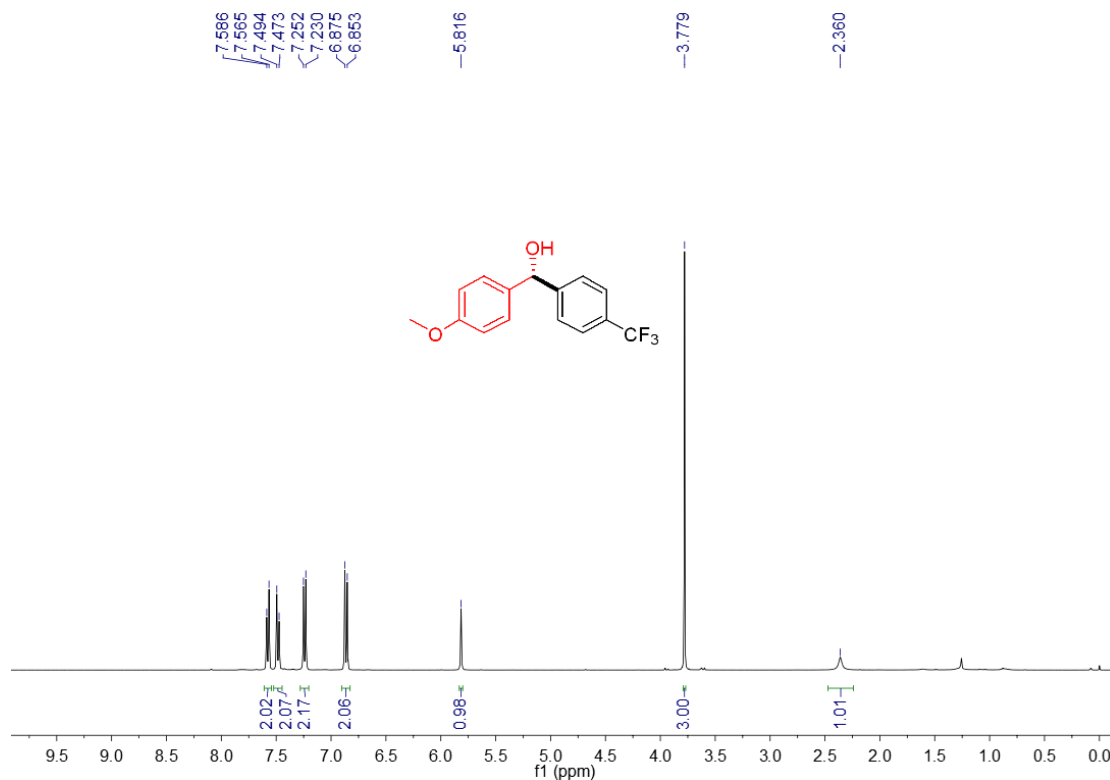

$^{13}\text{C}$  NMR spectrum of compound **3a** (100 MHz) in  $\text{CDCl}_3$

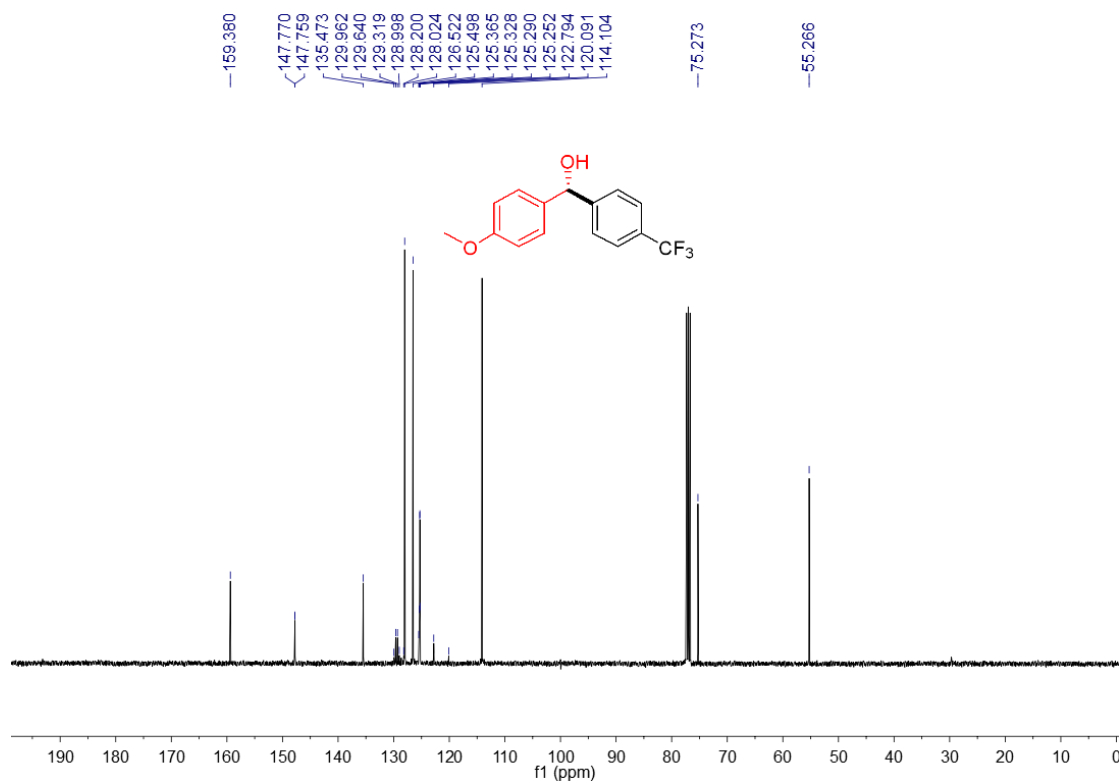

$^{19}\text{F}$  NMR spectrum of compound **3a** (376 MHz) in  $\text{CDCl}_3$

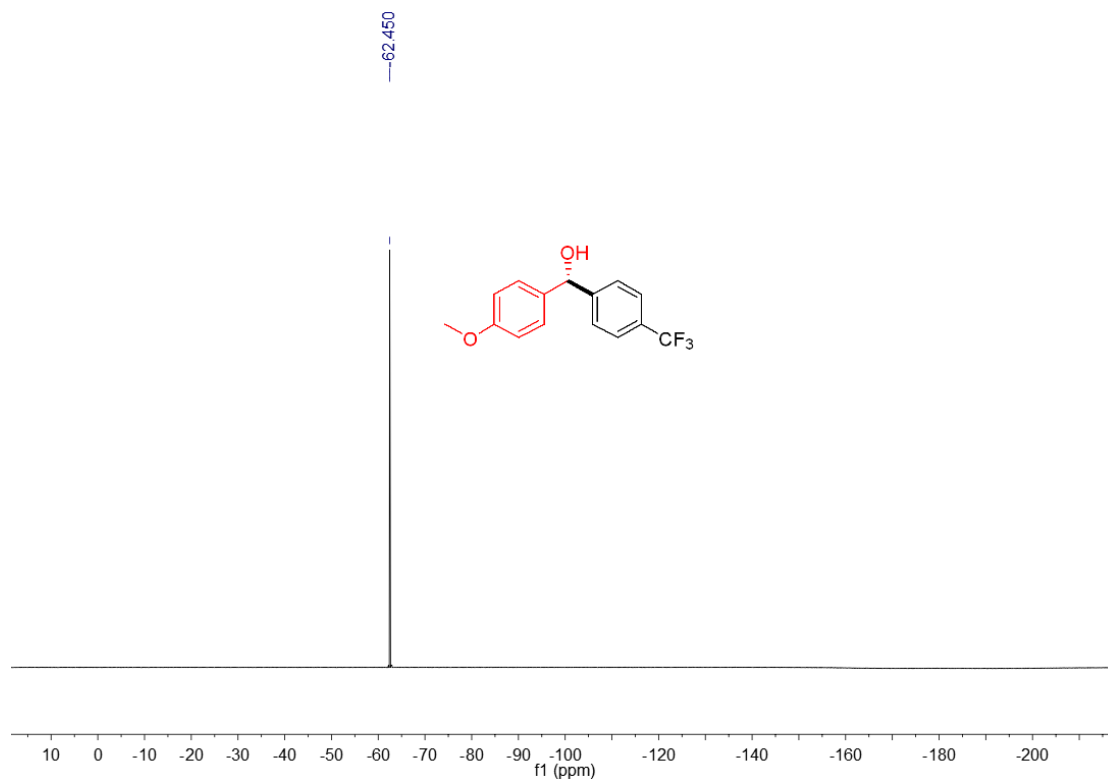

$^1\text{H}$  NMR spectrum of compound **3b** (400 MHz) in  $\text{CDCl}_3$

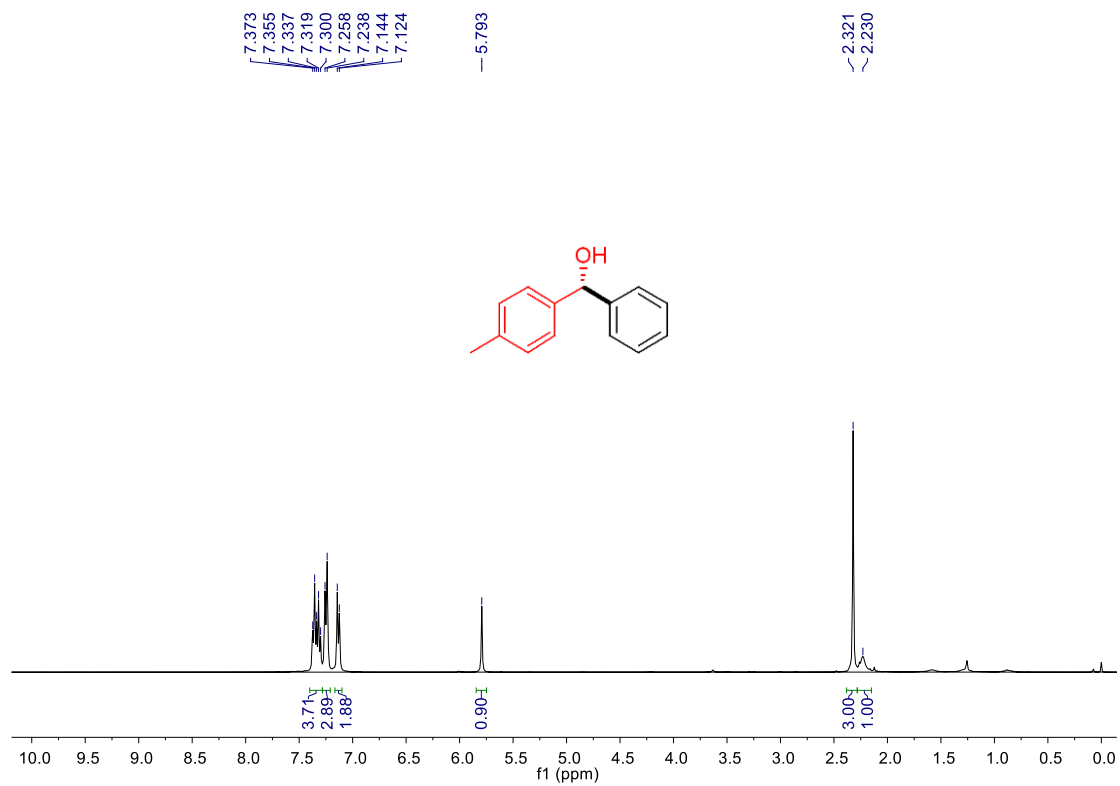

$^{13}\text{C}$  NMR spectrum of compound **3b** (100 MHz) in  $\text{CDCl}_3$

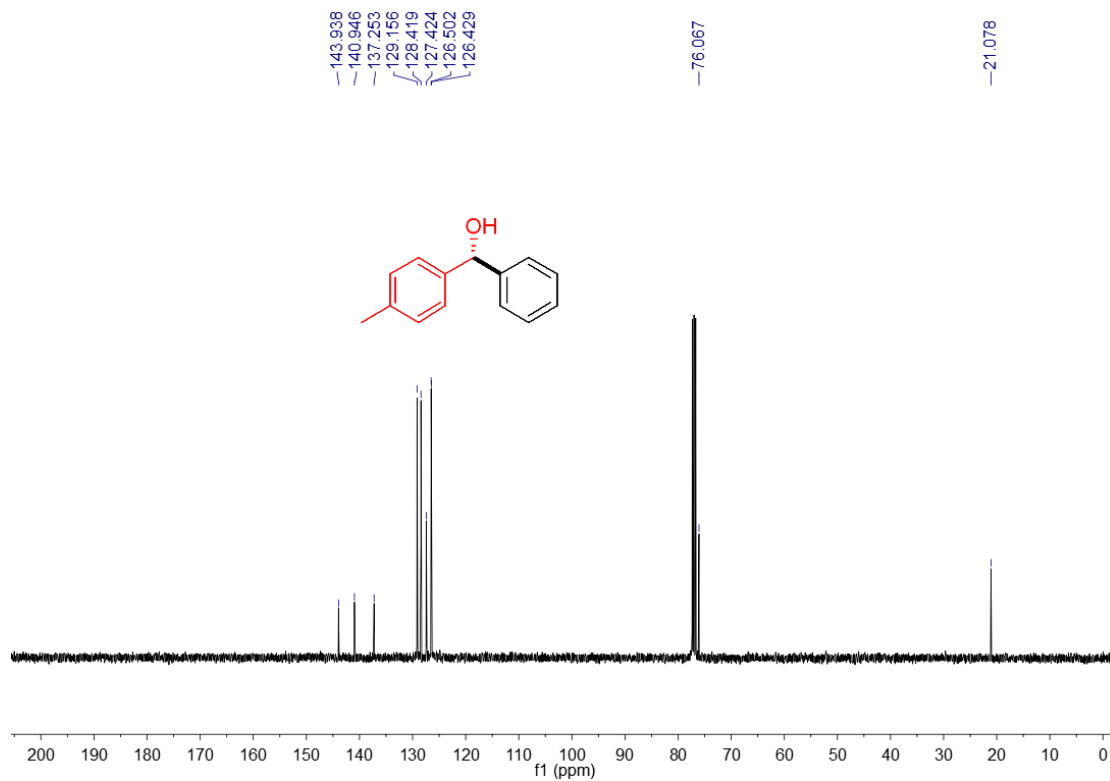

$^1\text{H}$  NMR spectrum of compound **3c** (400 MHz) in  $\text{CDCl}_3$

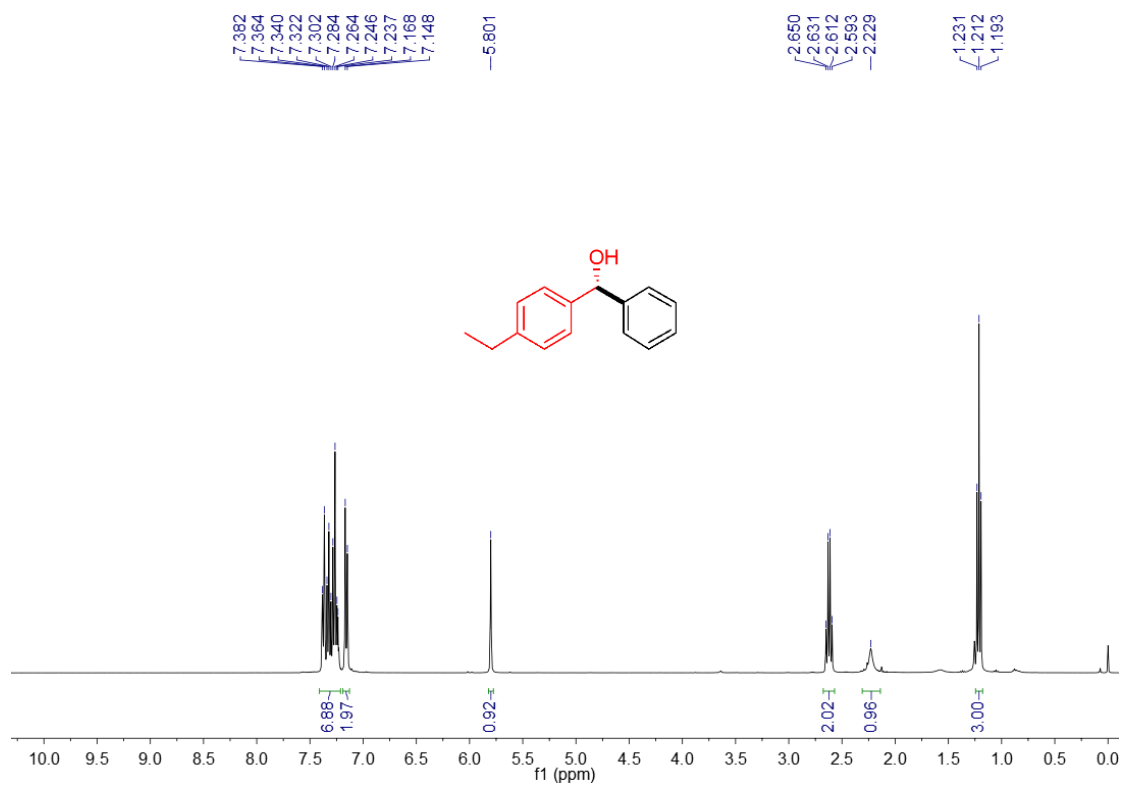



$^{13}\text{C}$  NMR spectrum of compound **3c** (100 MHz) in  $\text{CDCl}_3$

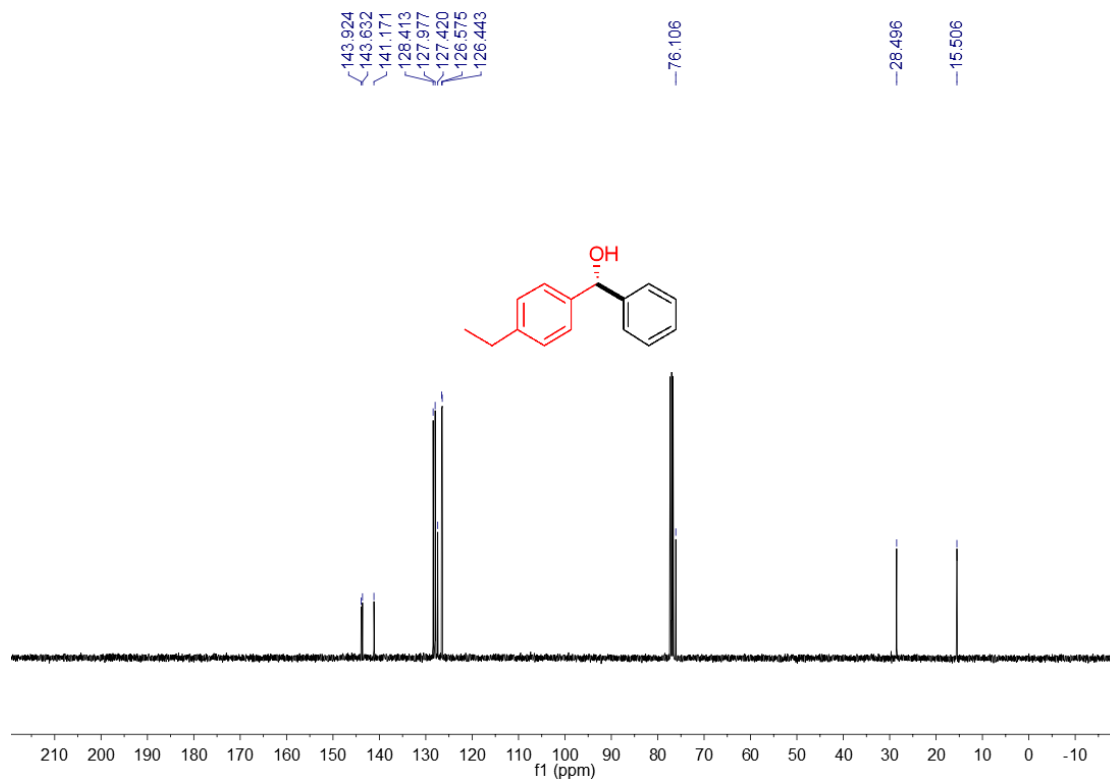

$^1\text{H}$  NMR spectrum of compound **3d** (400 MHz) in  $\text{CDCl}_3$

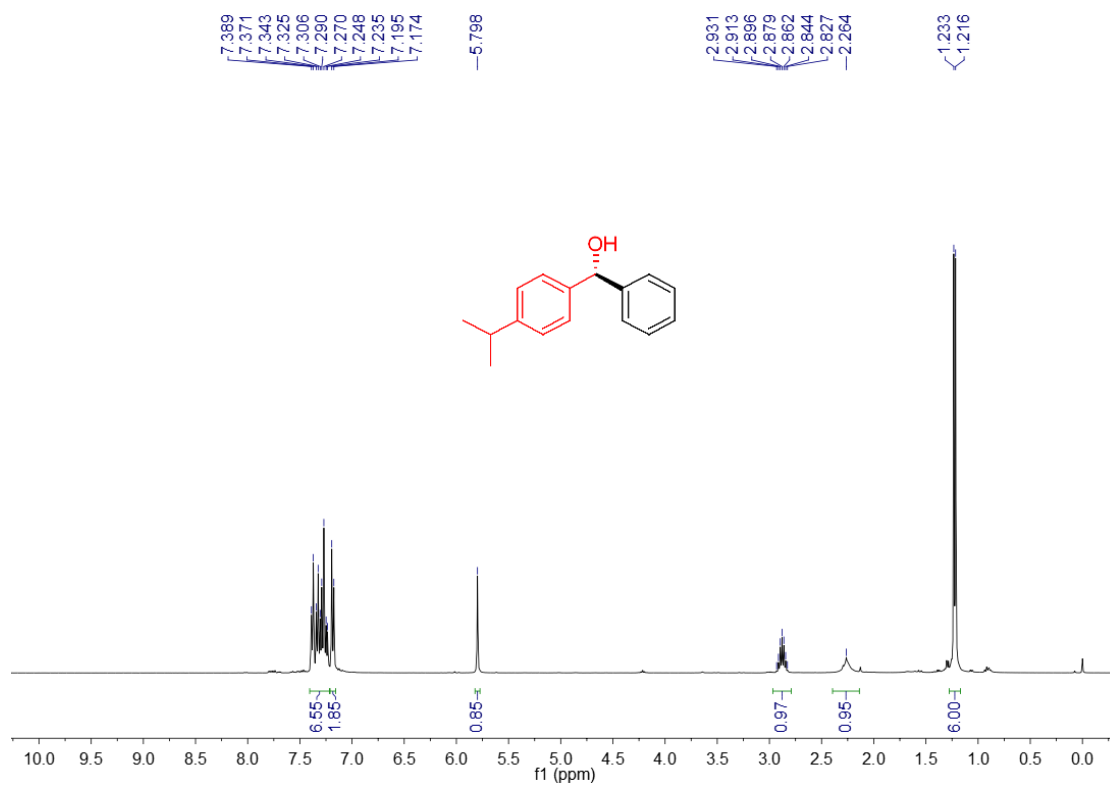

$^{13}\text{C}$  NMR spectrum of compound **3d** (100 MHz) in  $\text{CDCl}_3$

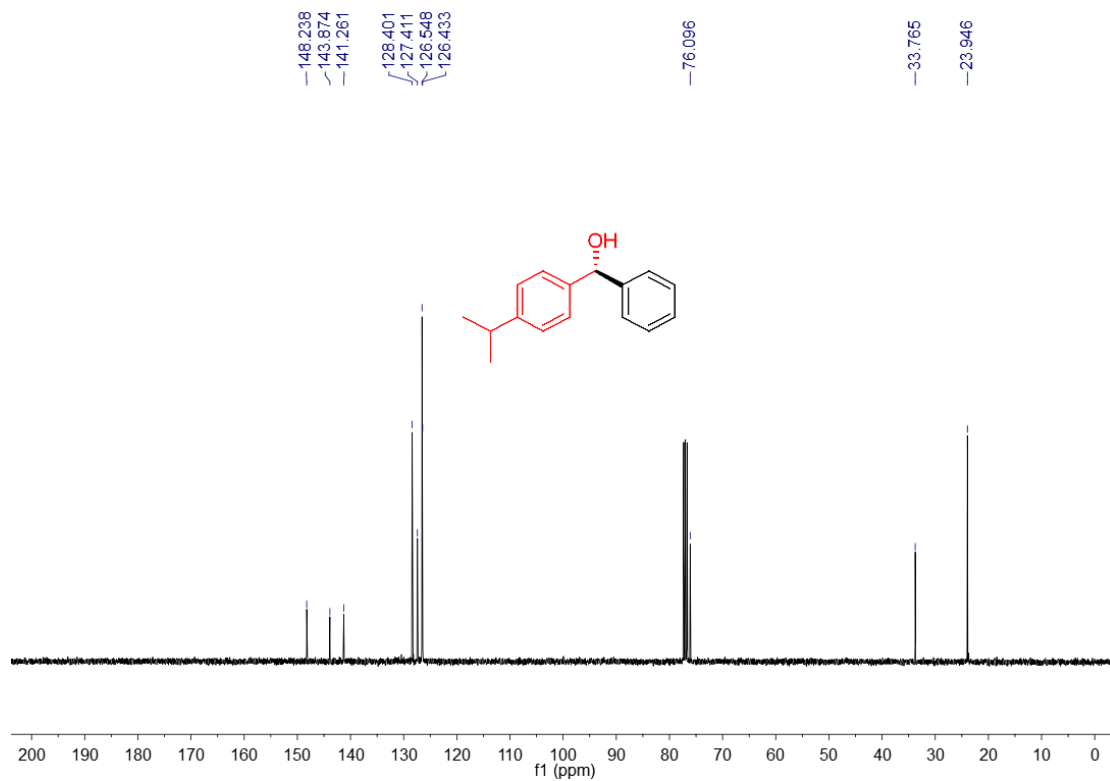

$^1\text{H}$  NMR spectrum of compound **3e** (400 MHz) in  $\text{CDCl}_3$

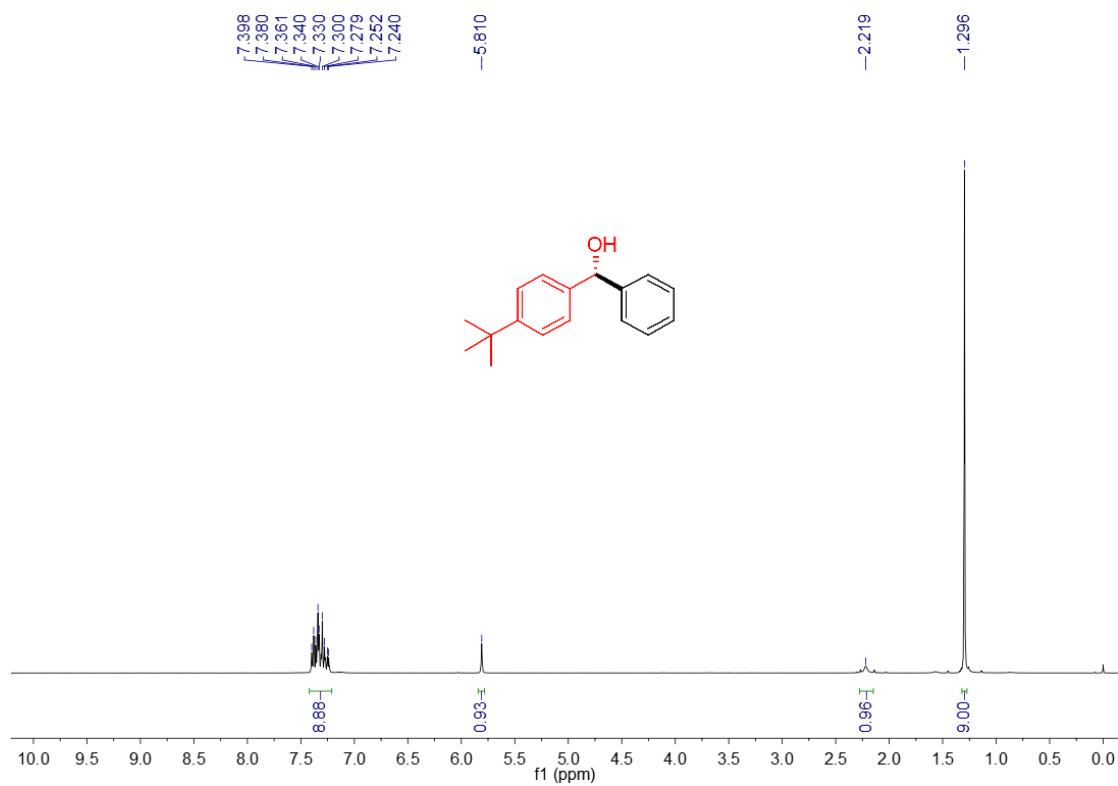

$^{13}\text{C}$  NMR spectrum of compound **3e** (100 MHz) in  $\text{CDCl}_3$

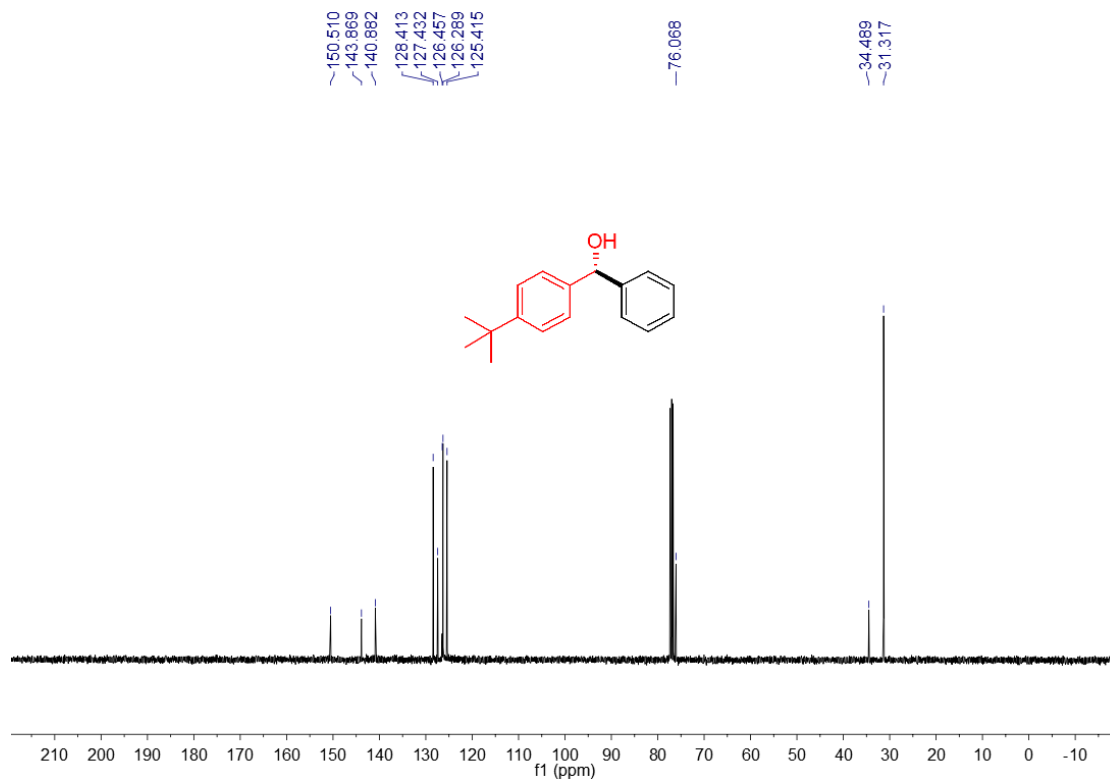

$^1\text{H}$  NMR spectrum of compound **3f** (400 MHz) in  $\text{CDCl}_3$

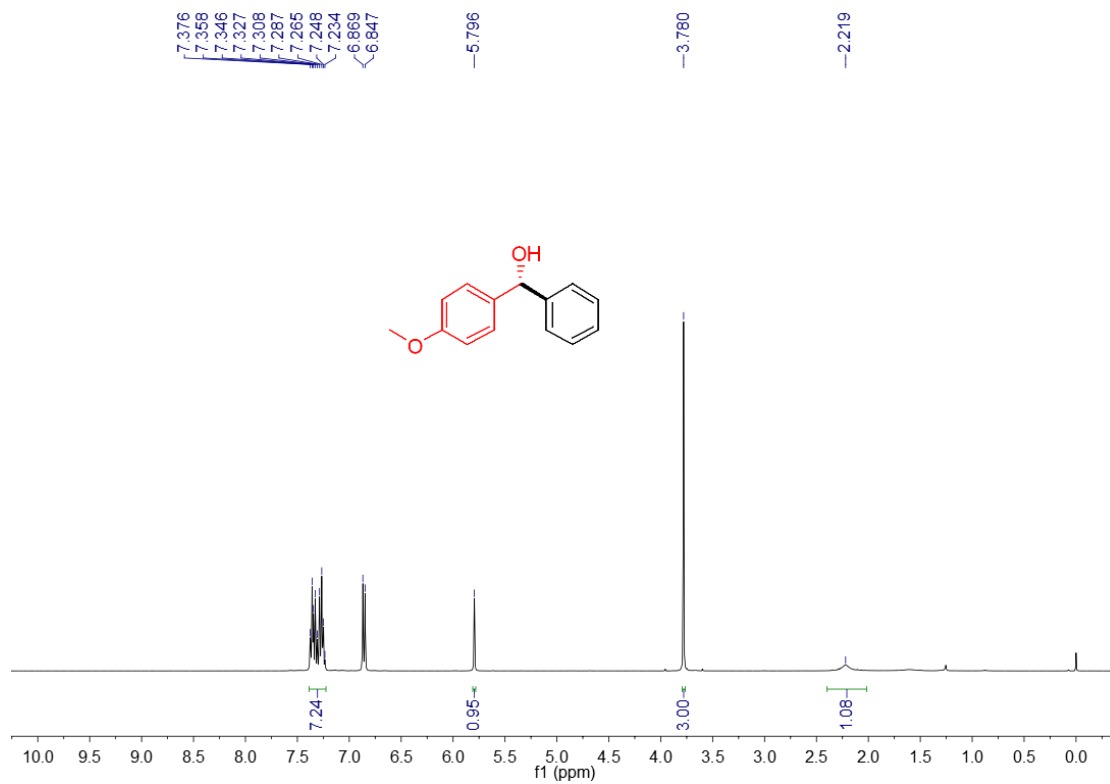

$^{13}\text{C}$  NMR spectrum of compound **3f** (100 MHz) in  $\text{CDCl}_3$

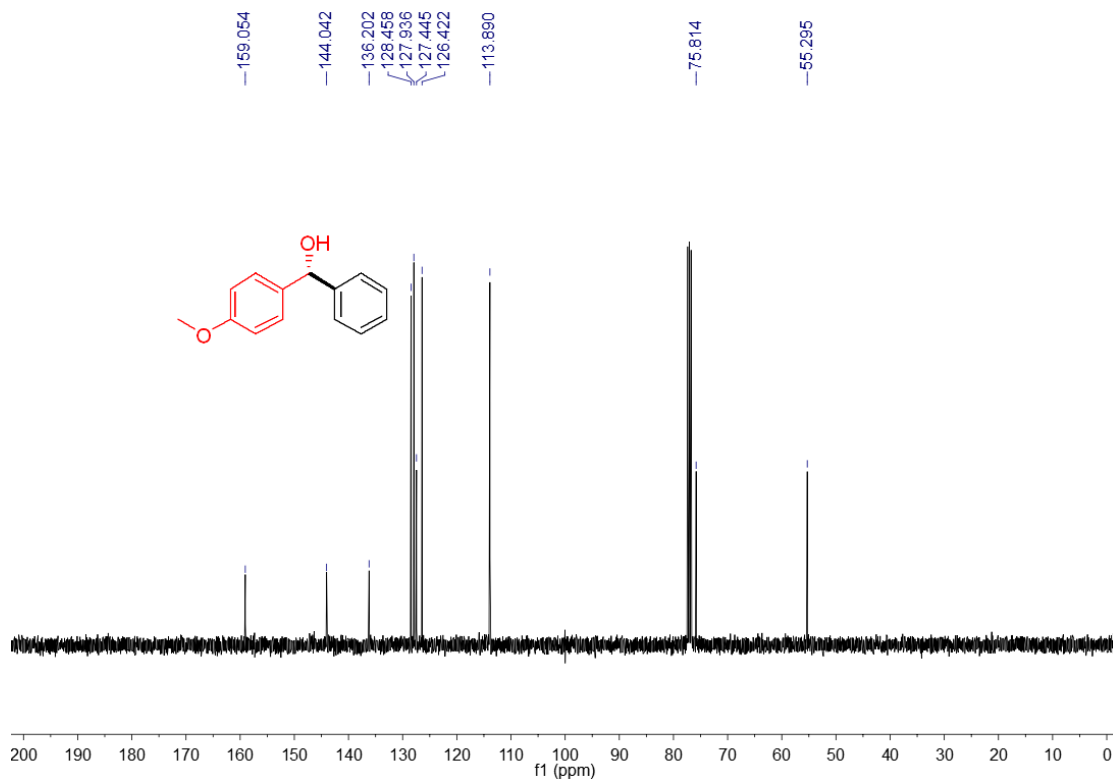

$^1\text{H}$  NMR spectrum of compound **3g** (400 MHz) in  $\text{CDCl}_3$

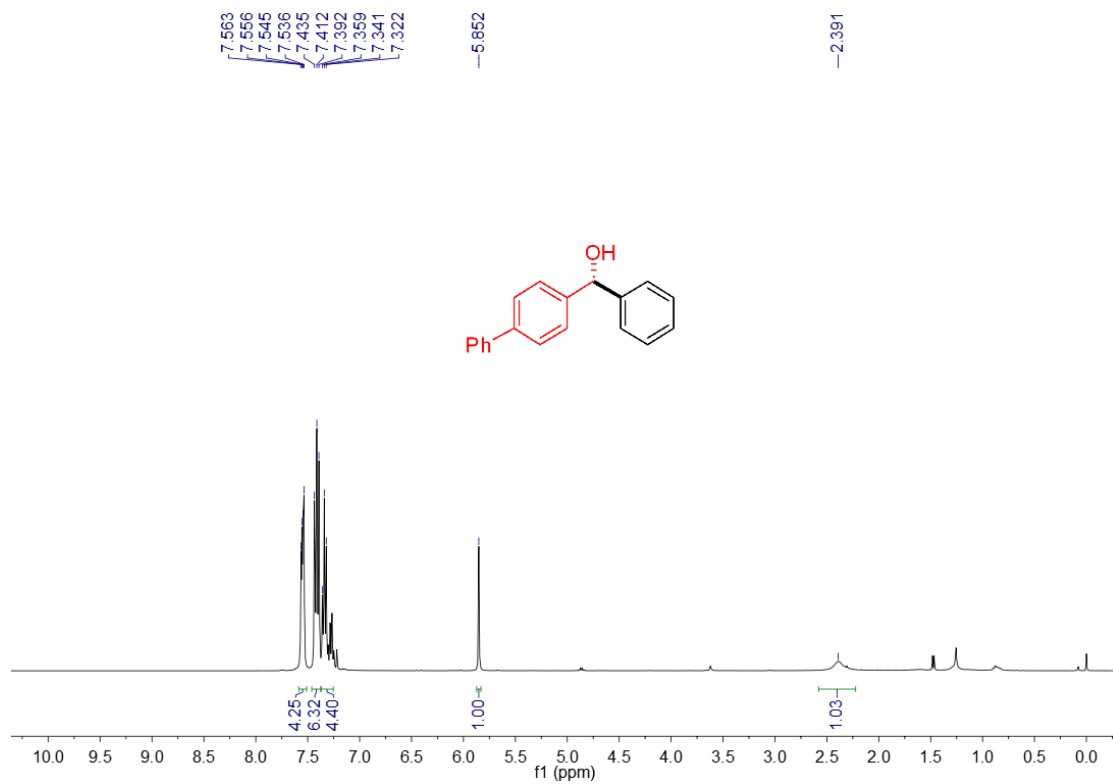

$^{13}\text{C}$  NMR spectrum of compound **3g** (100 MHz) in  $\text{CDCl}_3$

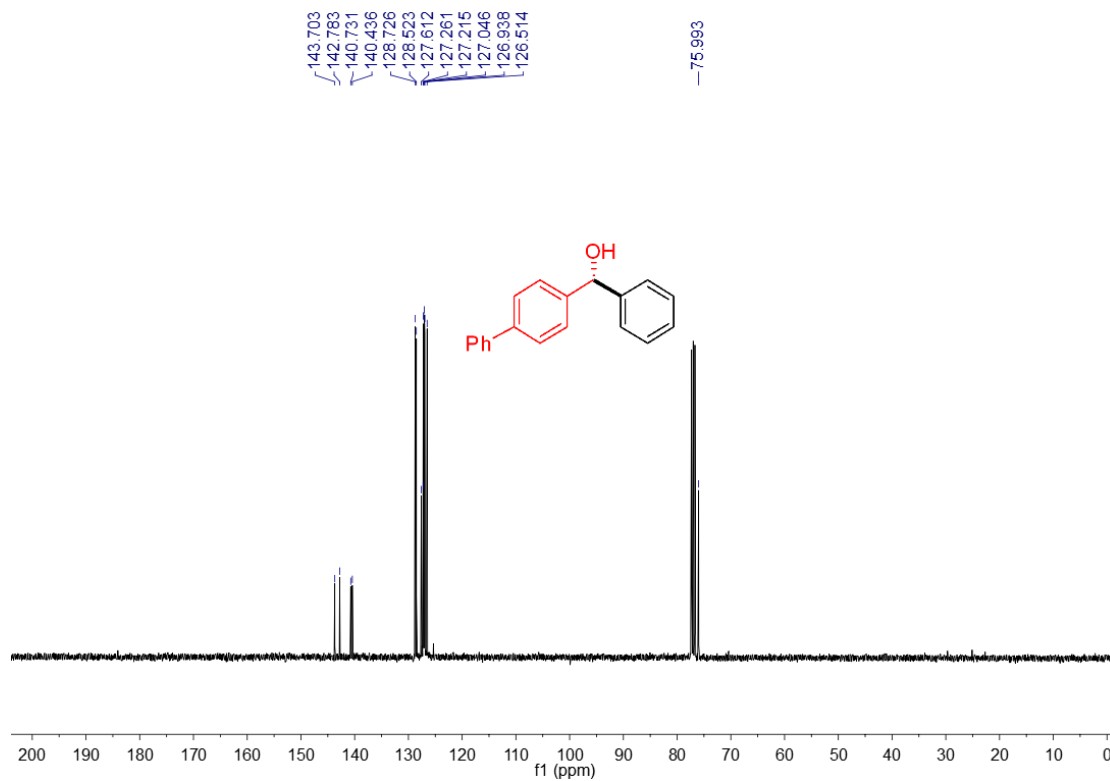

$^1\text{H}$  NMR spectrum of compound **3h** (400 MHz) in  $\text{CDCl}_3$

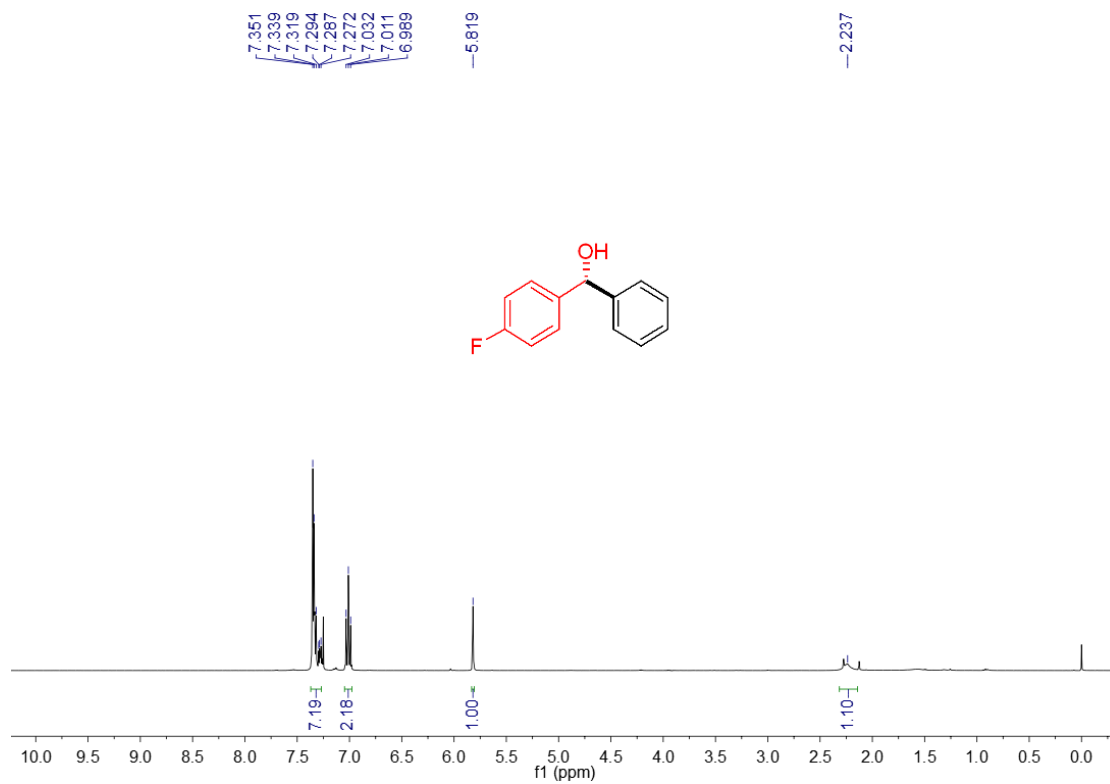

$^{13}\text{C}$  NMR spectrum of compound **3h** (100 MHz) in  $\text{CDCl}_3$

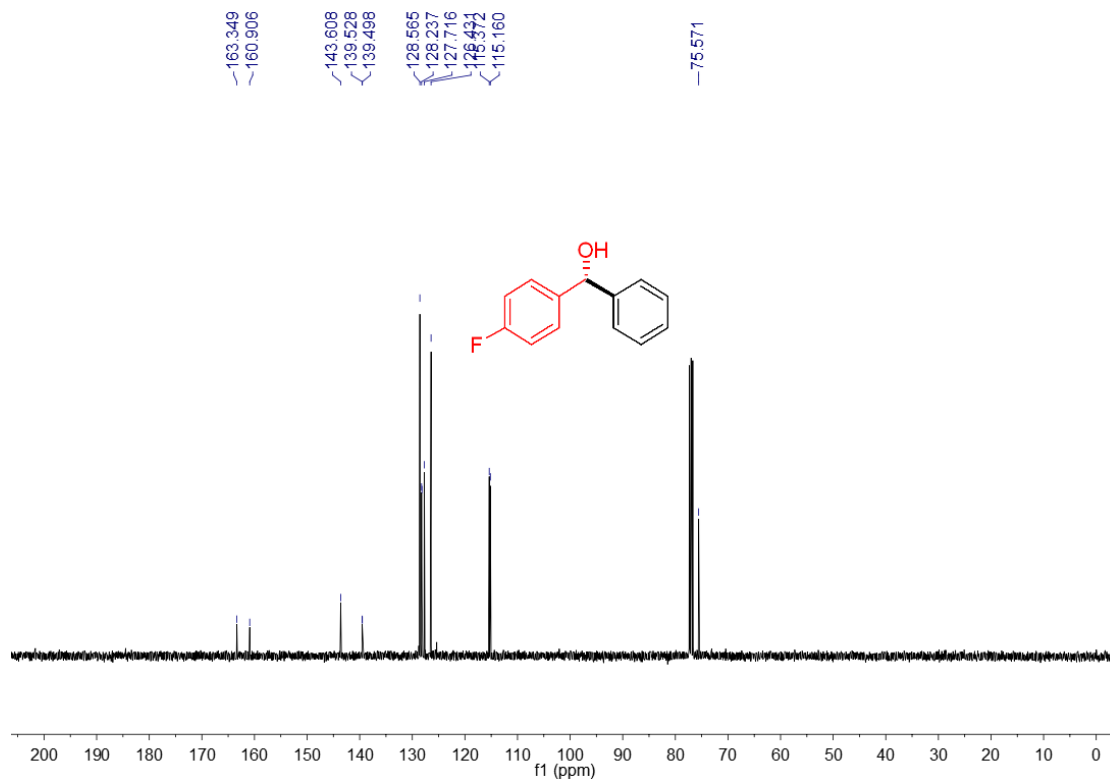

$^{19}\text{F}$  NMR spectrum of compound **3h** (376 MHz) in  $\text{CDCl}_3$

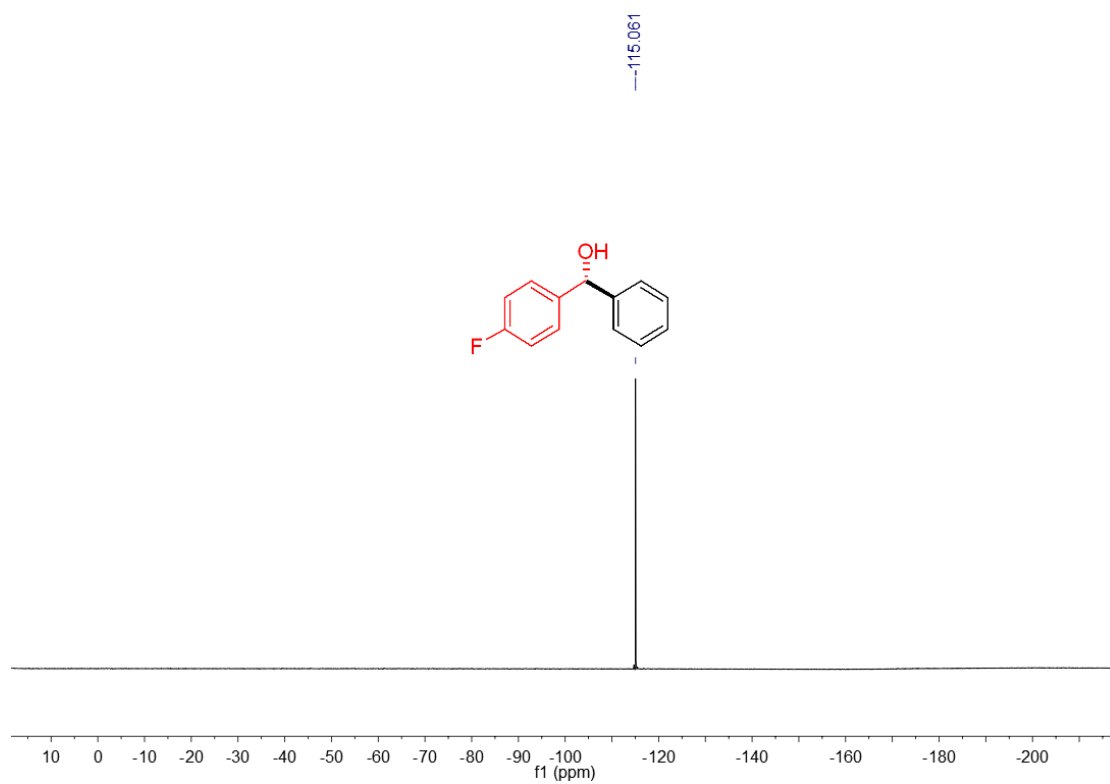

$^1\text{H}$  NMR spectrum of compound **3i** (400 MHz) in  $\text{CDCl}_3$

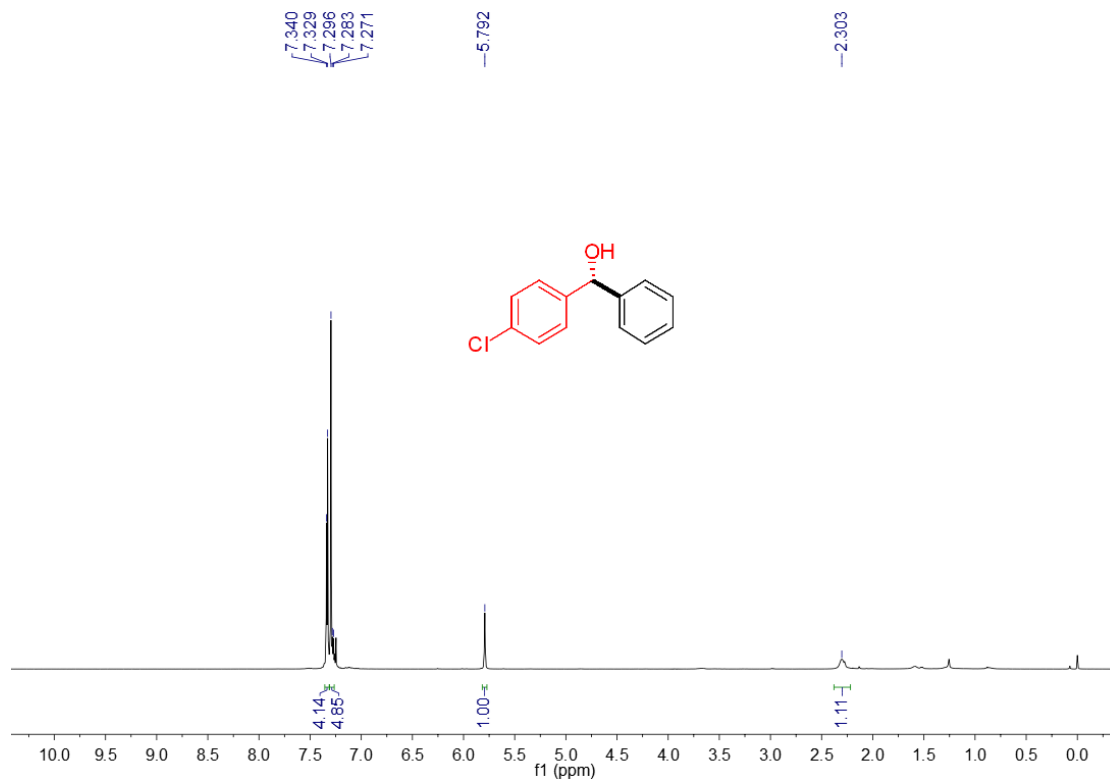

$^{13}\text{C}$  NMR spectrum of compound **3i** (100 MHz) in  $\text{CDCl}_3$

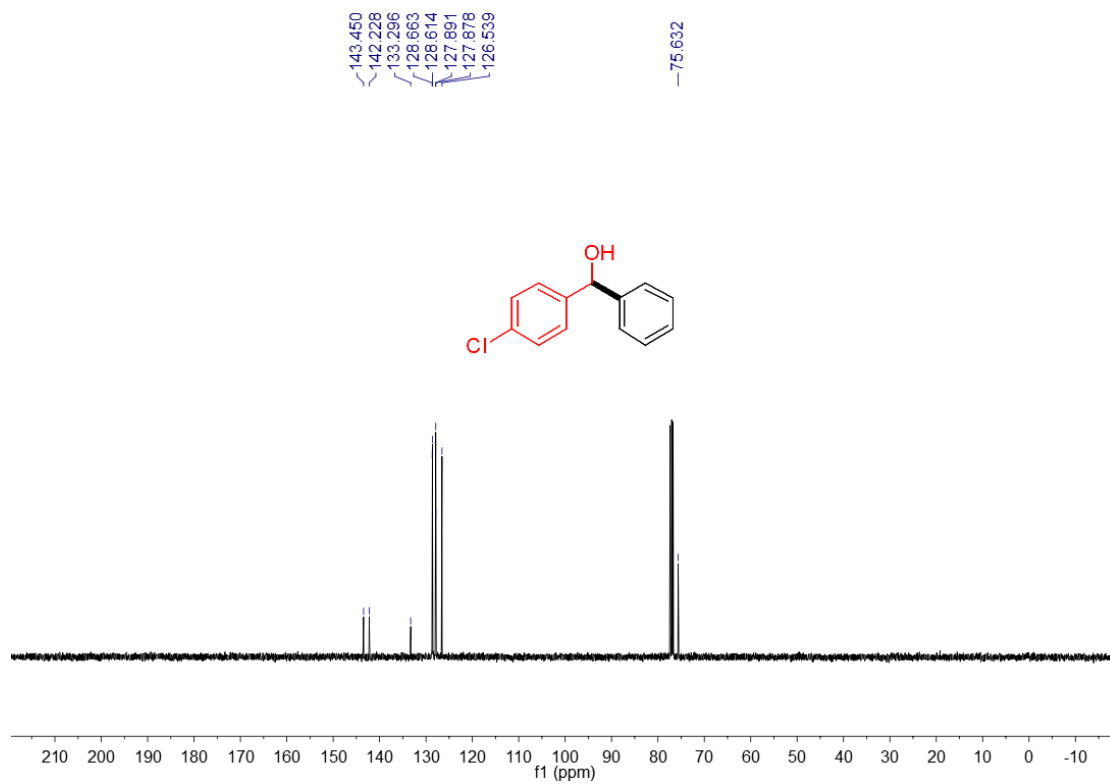

$^1\text{H}$  NMR spectrum of compound **3j** (400 MHz) in  $\text{CDCl}_3$

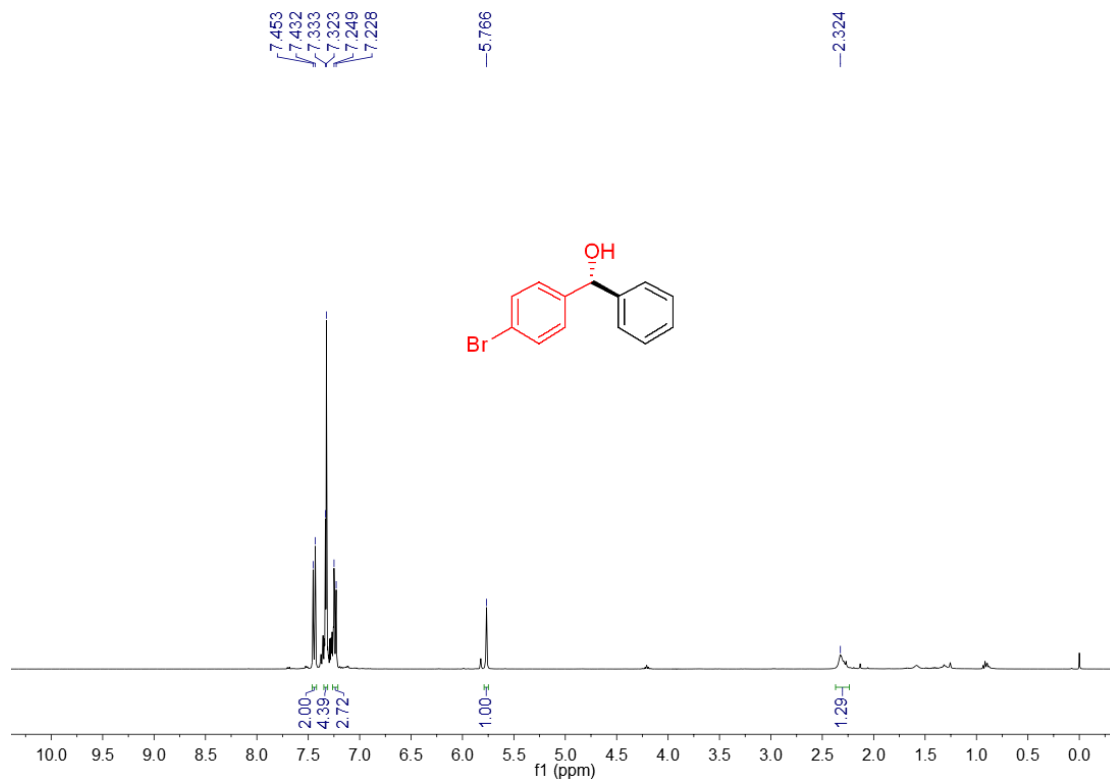

$^{13}\text{C}$  NMR spectrum of compound **3j** (100 MHz) in  $\text{CDCl}_3$

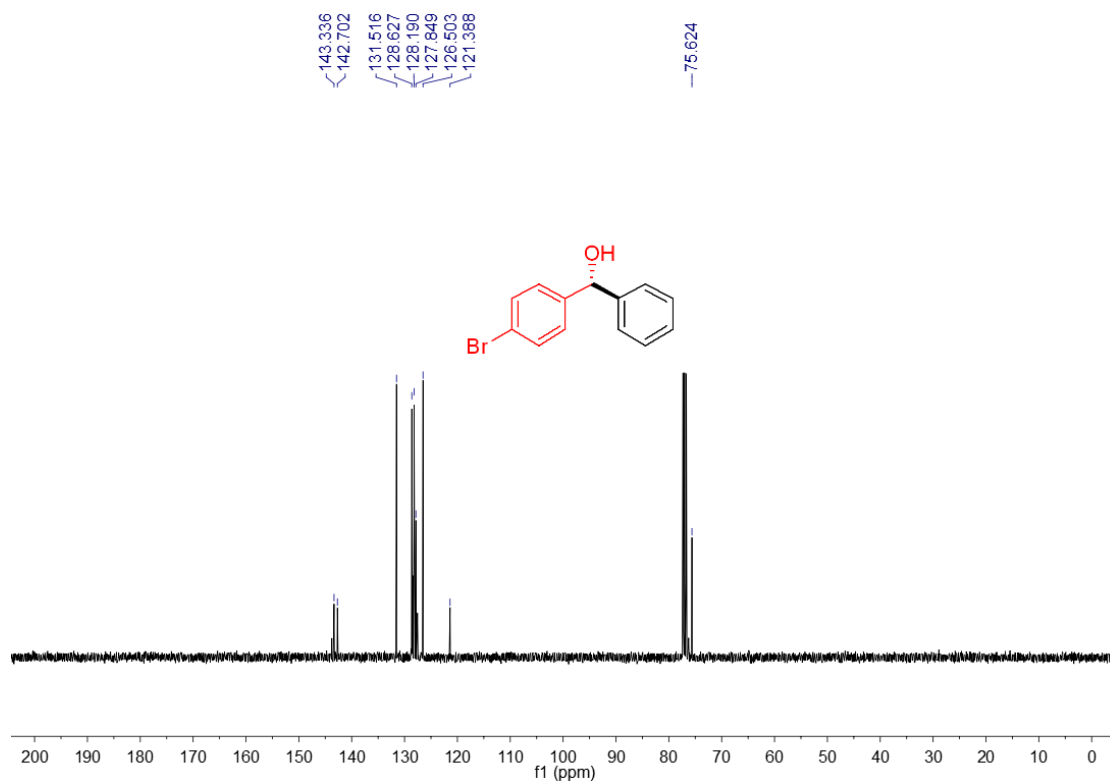



$^1\text{H}$  NMR spectrum of compound **3k** (400 MHz) in  $\text{CDCl}_3$

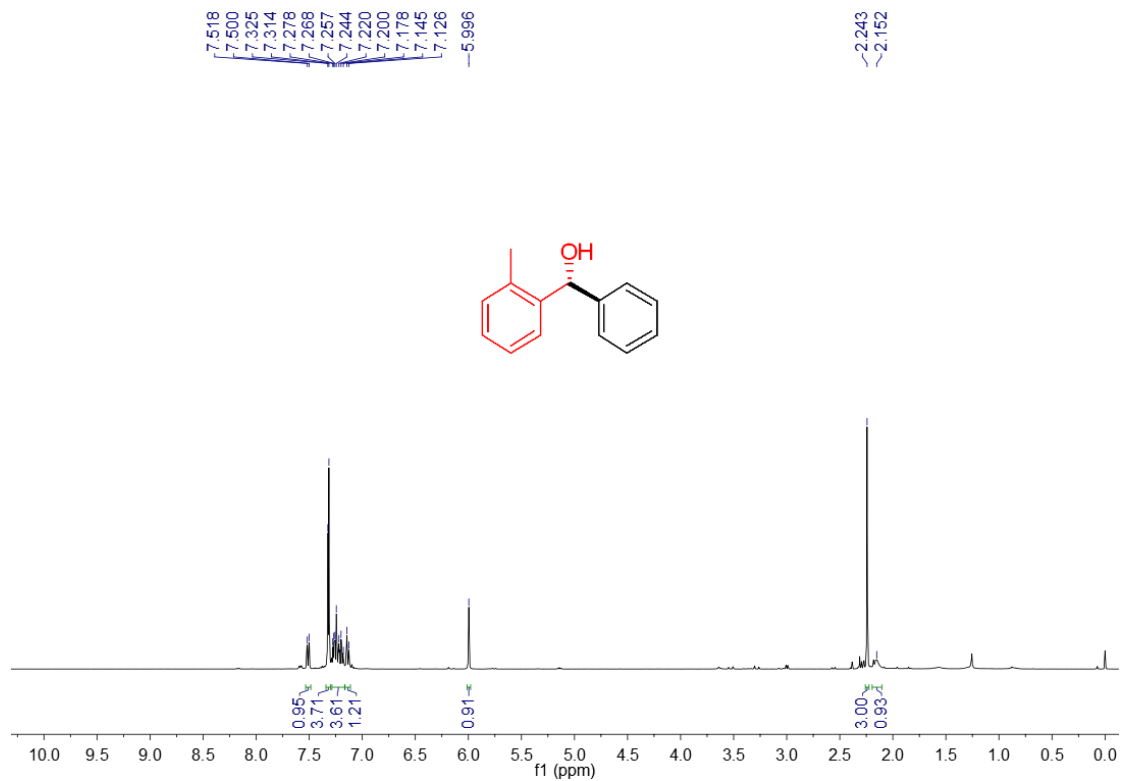

$^{13}\text{C}$  NMR spectrum of compound **3k** (100 MHz) in  $\text{CDCl}_3$

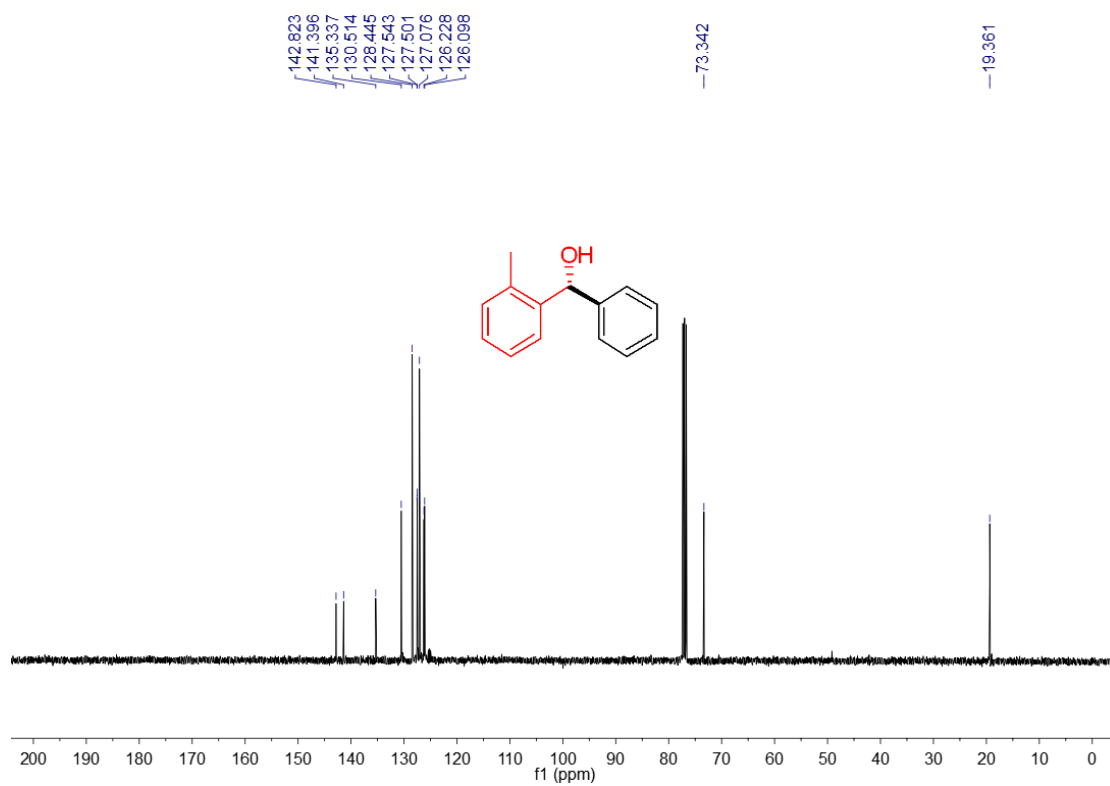

$^1\text{H}$  NMR spectrum of compound **3I** (400 MHz) in  $\text{CDCl}_3$

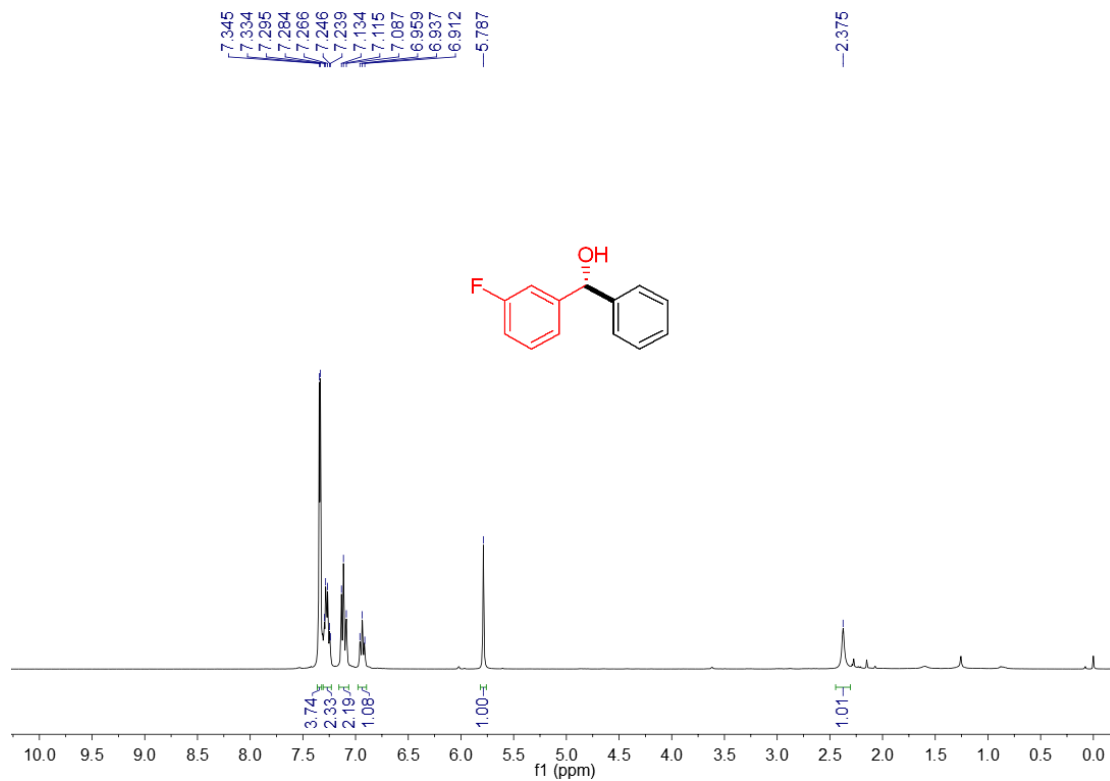

$^{13}\text{C}$  NMR spectrum of compound **3I** (100 MHz) in  $\text{CDCl}_3$

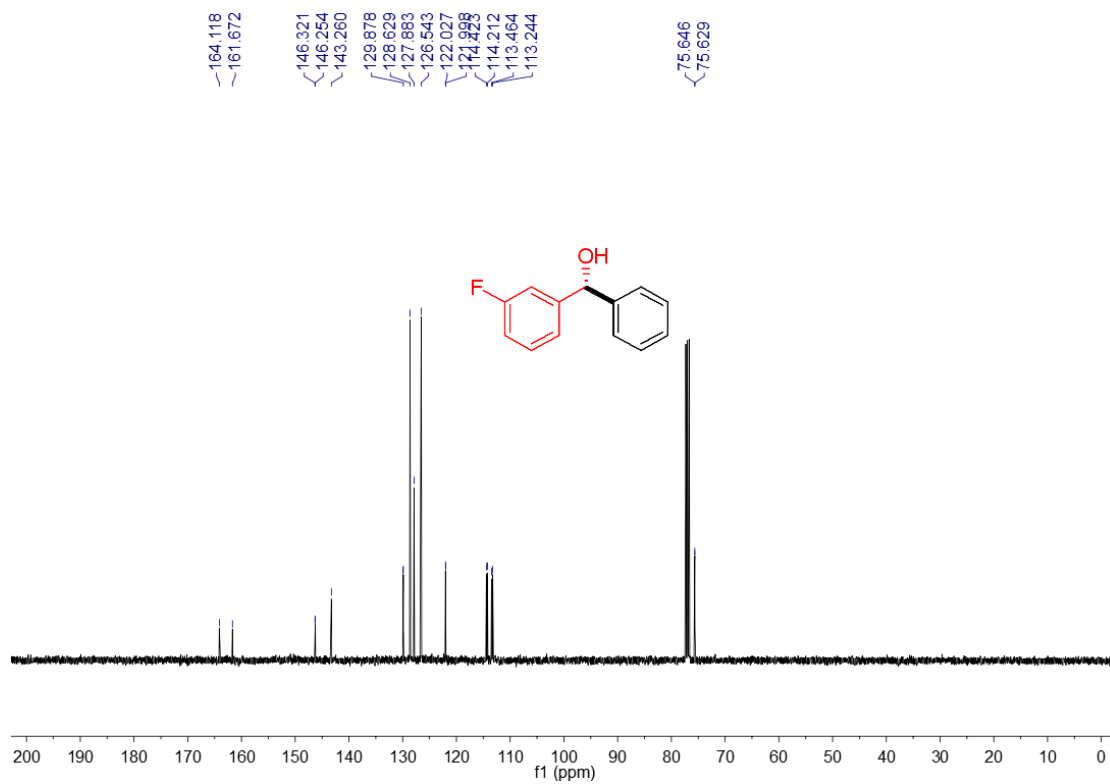

$^{19}\text{F}$  NMR spectrum of compound **3l** (376 MHz) in  $\text{CDCl}_3$

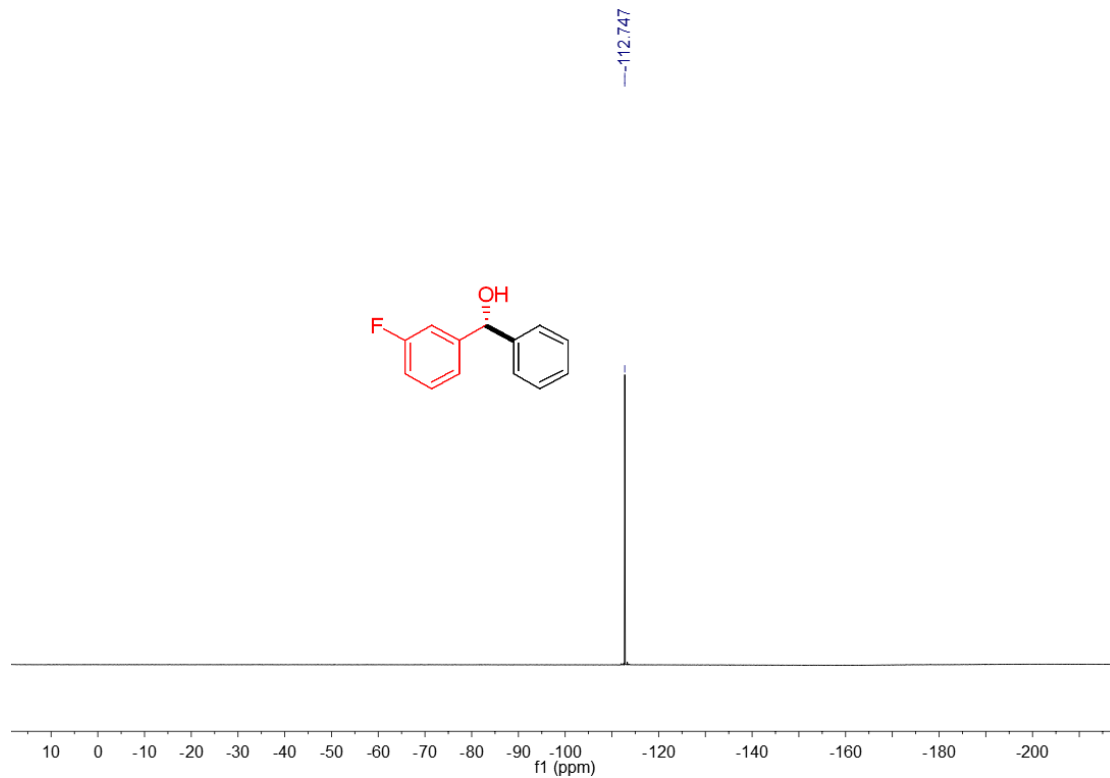

$^1\text{H}$  NMR spectrum of compound **3m** (400 MHz) in  $\text{CDCl}_3$

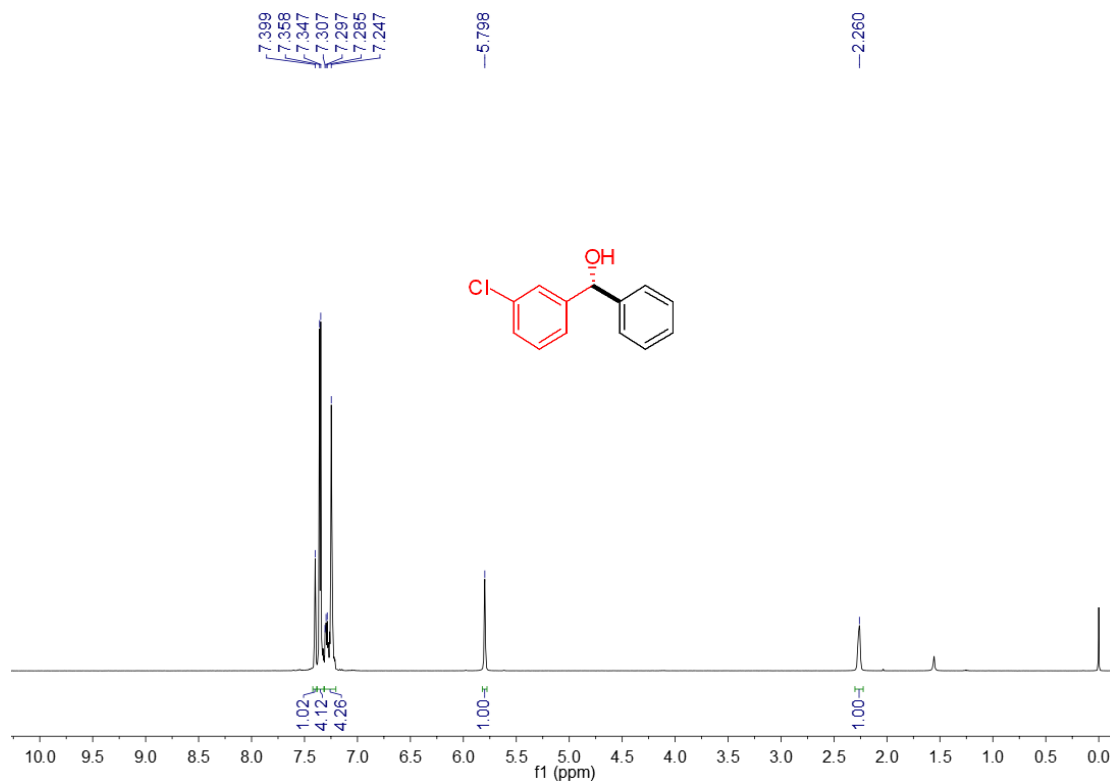

$^{13}\text{C}$  NMR spectrum of compound **3m** (100 MHz) in  $\text{DMSO-}d_6$

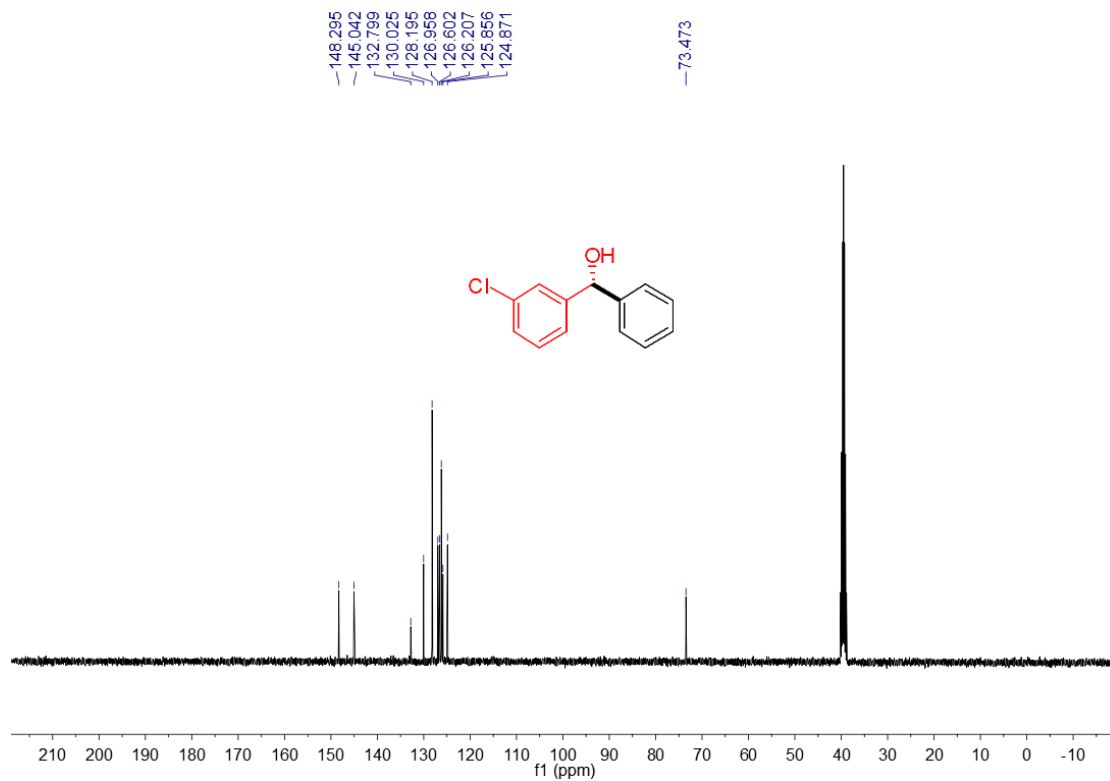

$^1\text{H}$  NMR spectrum of compound **3n** (400 MHz) in  $\text{CDCl}_3$

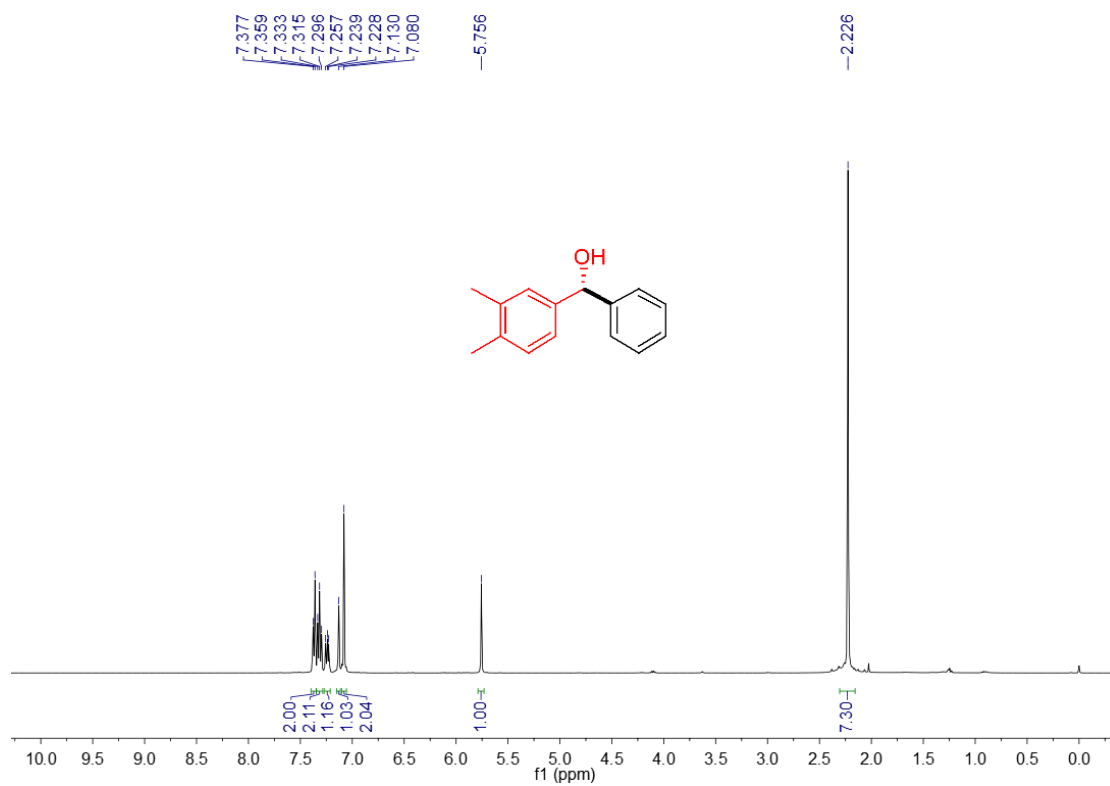

$^{13}\text{C}$  NMR spectrum of compound **3n** (100 MHz) in  $\text{CDCl}_3$

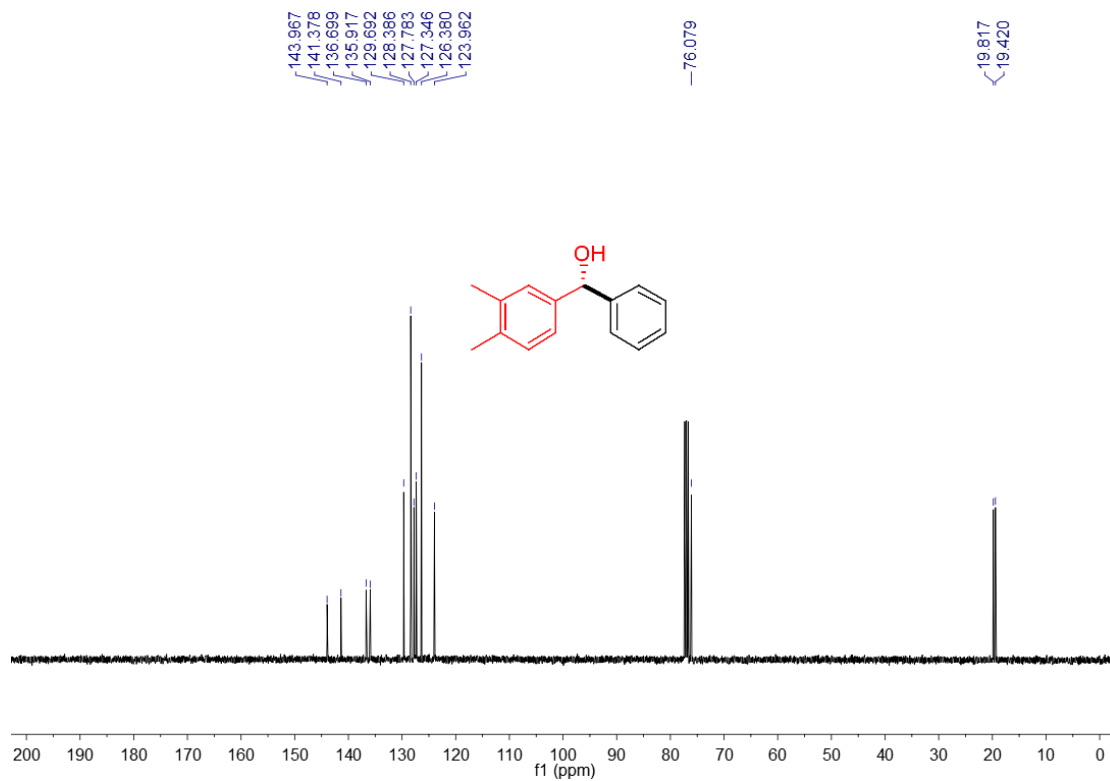

$^1\text{H}$  NMR spectrum of compound **3o** (400 MHz) in  $\text{CDCl}_3$

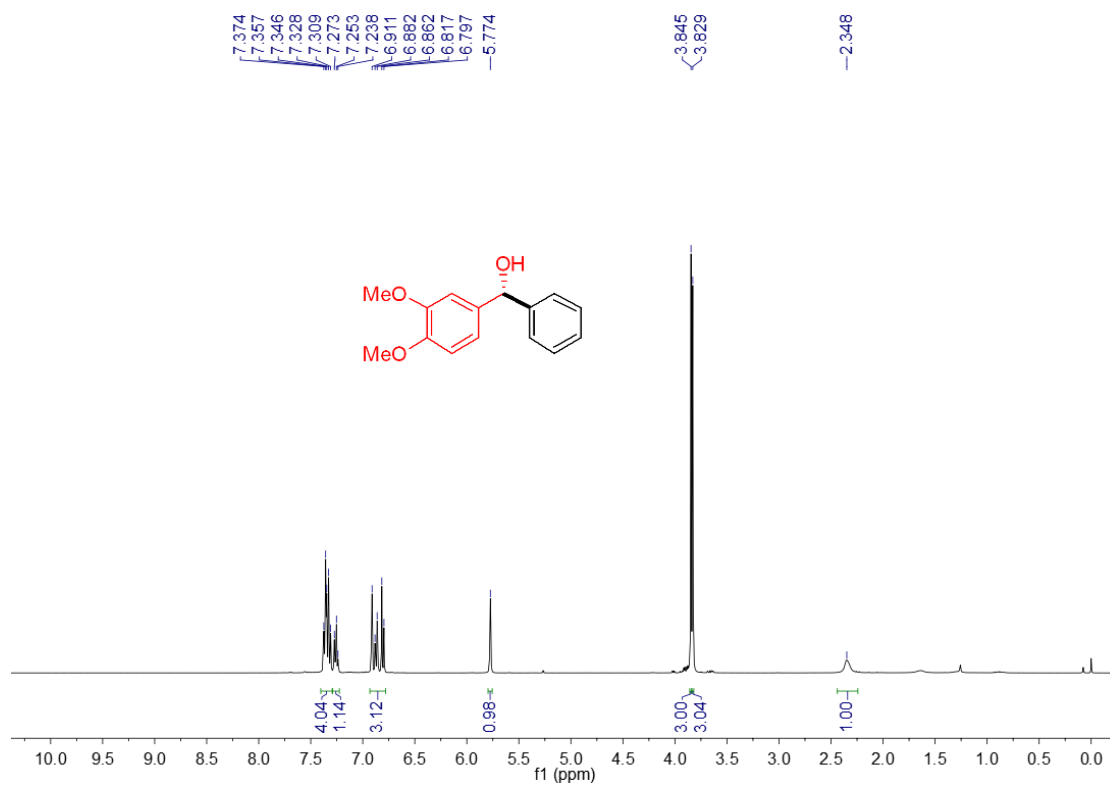

$^{13}\text{C}$  NMR spectrum of compound **3o** (100 MHz) in  $\text{CDCl}_3$

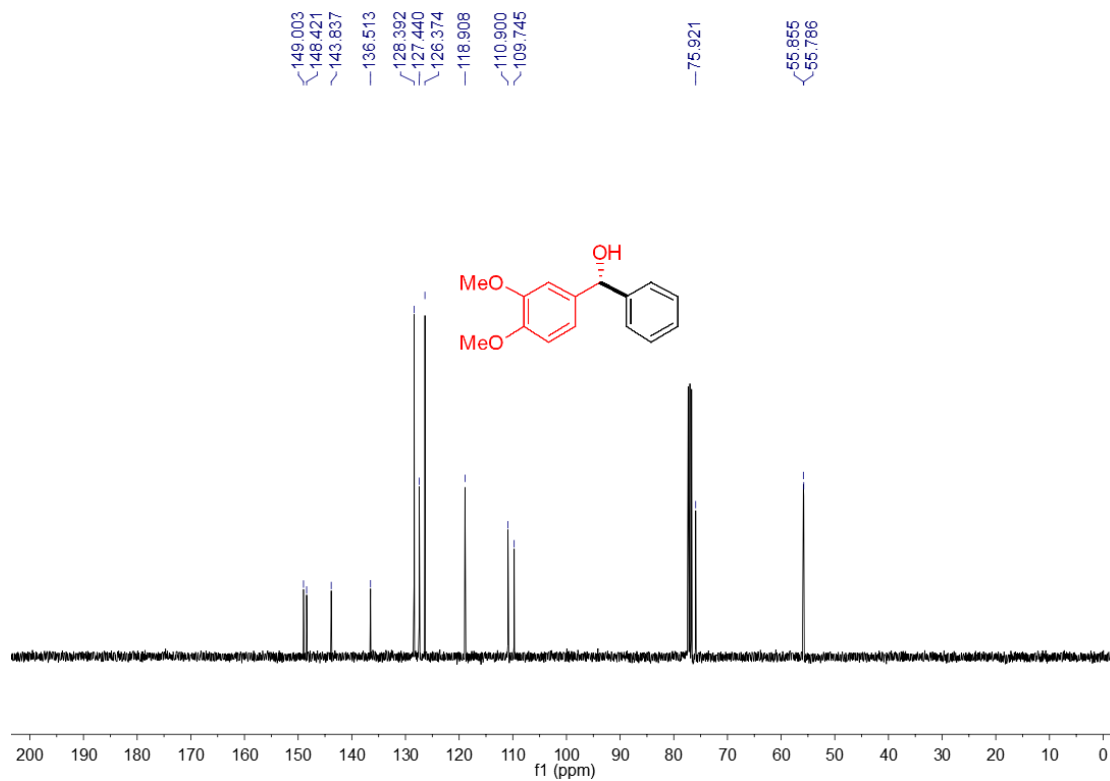

$^1\text{H}$  NMR spectrum of compound **3p** (400 MHz) in  $\text{CDCl}_3$

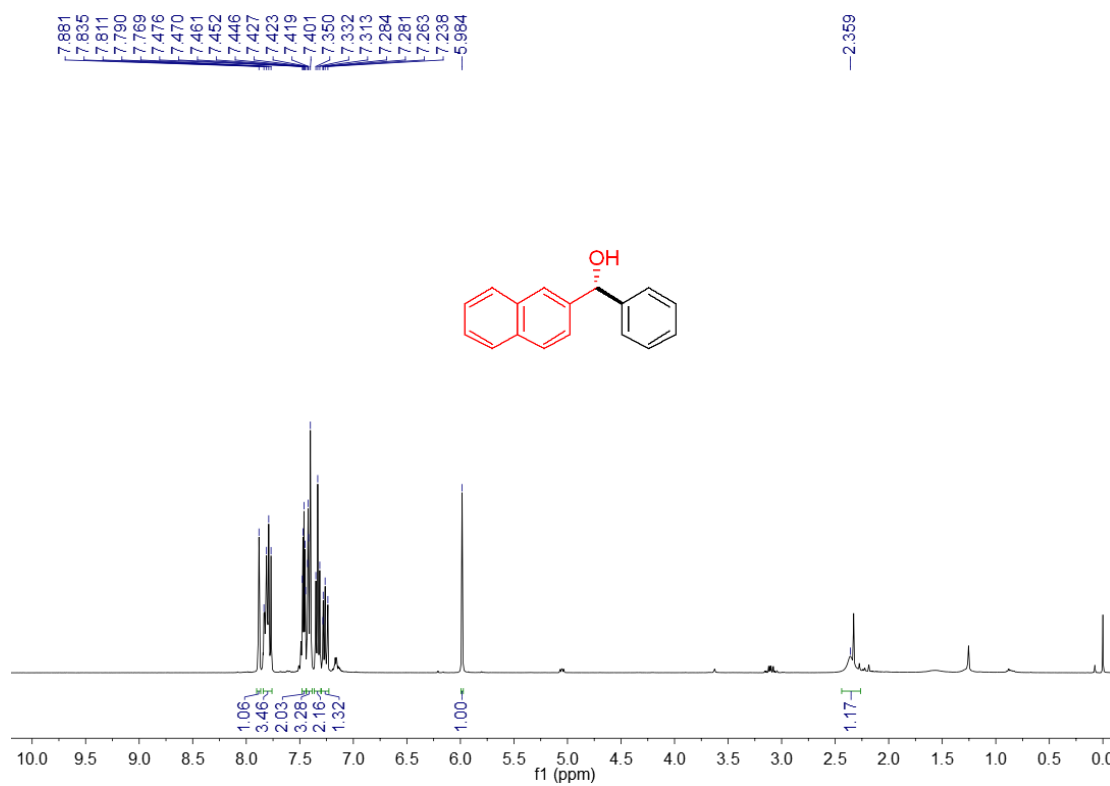

$^{13}\text{C}$  NMR spectrum of compound **3p** (100 MHz) in  $\text{CDCl}_3$

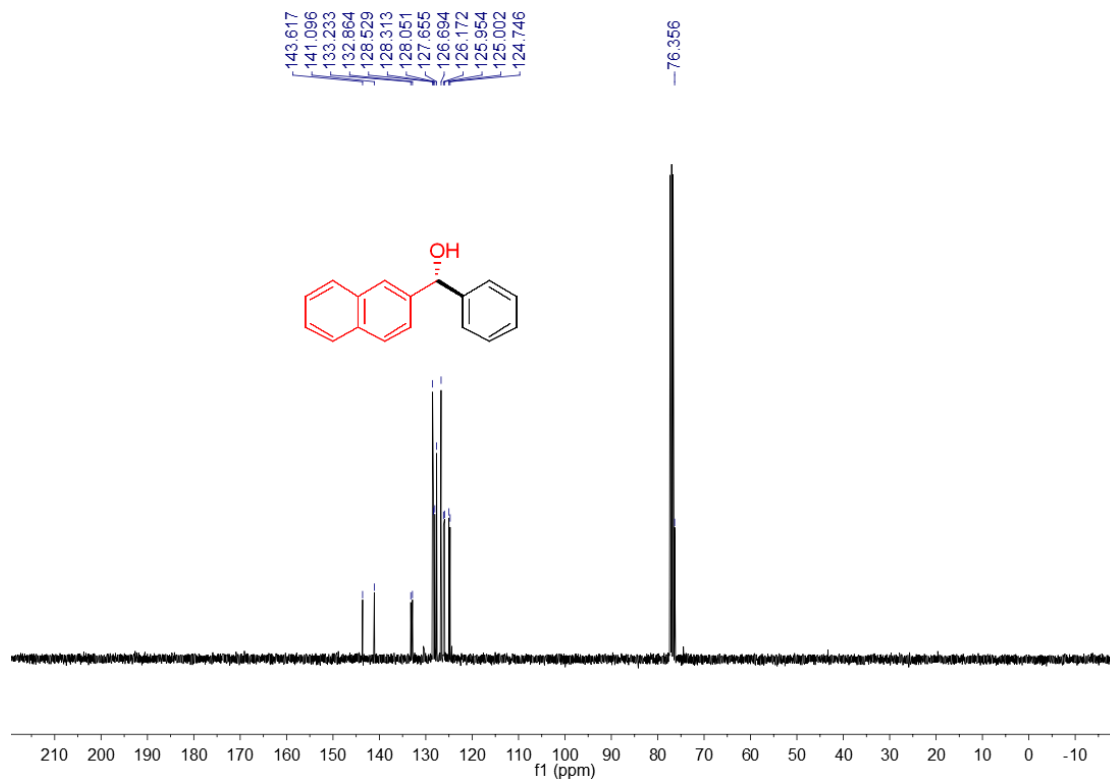

$^1\text{H}$  NMR spectrum of compound **3q** (400 MHz) in  $\text{CDCl}_3$

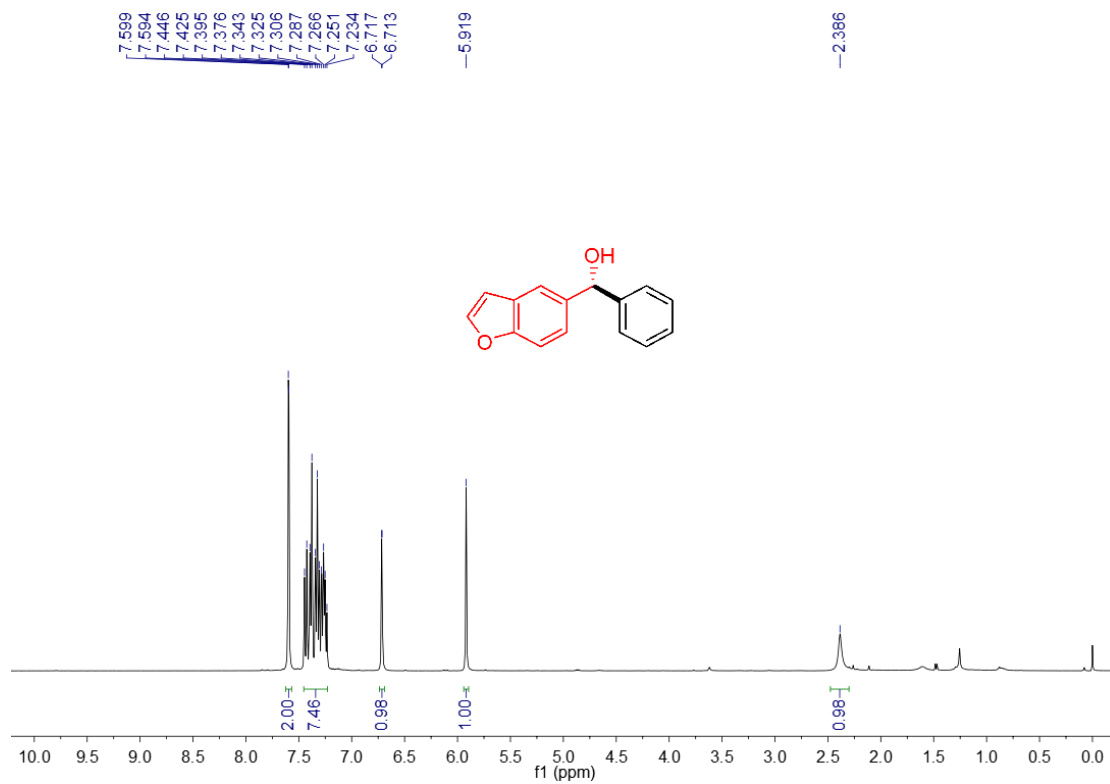

$^{13}\text{C}$  NMR spectrum of compound **3q** (100 MHz) in  $\text{CDCl}_3$

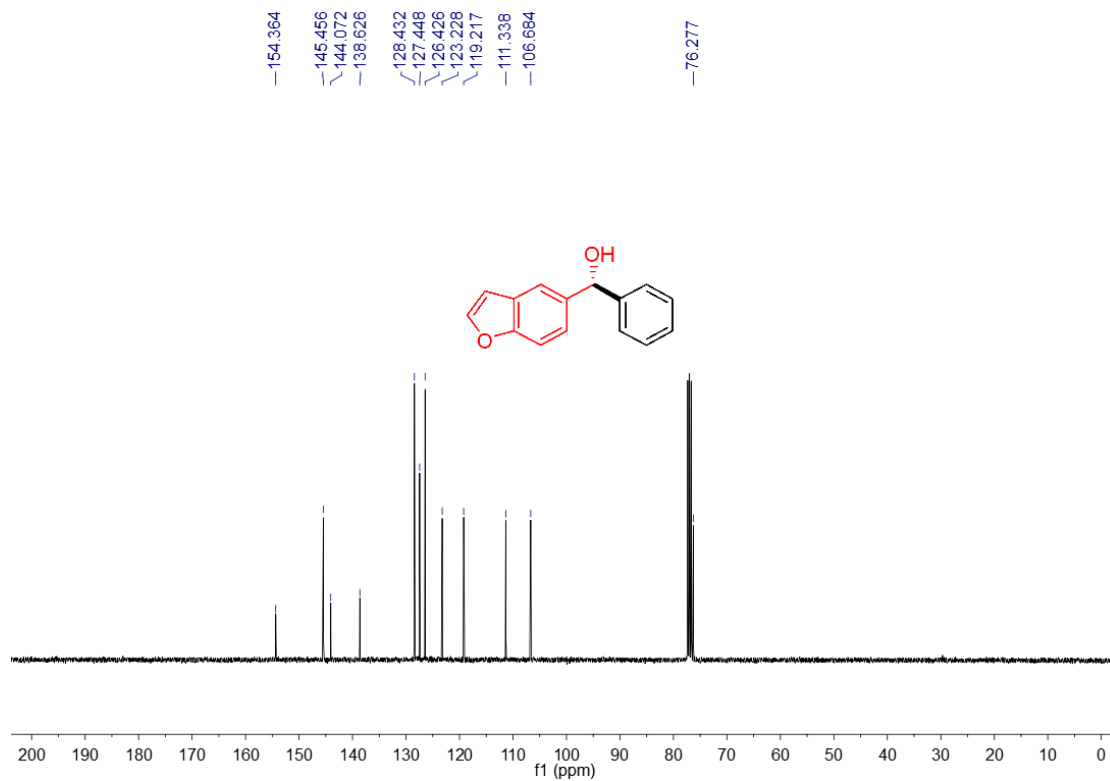

$^1\text{H}$  NMR spectrum of compound **3r** (400 MHz) in  $\text{CDCl}_3$

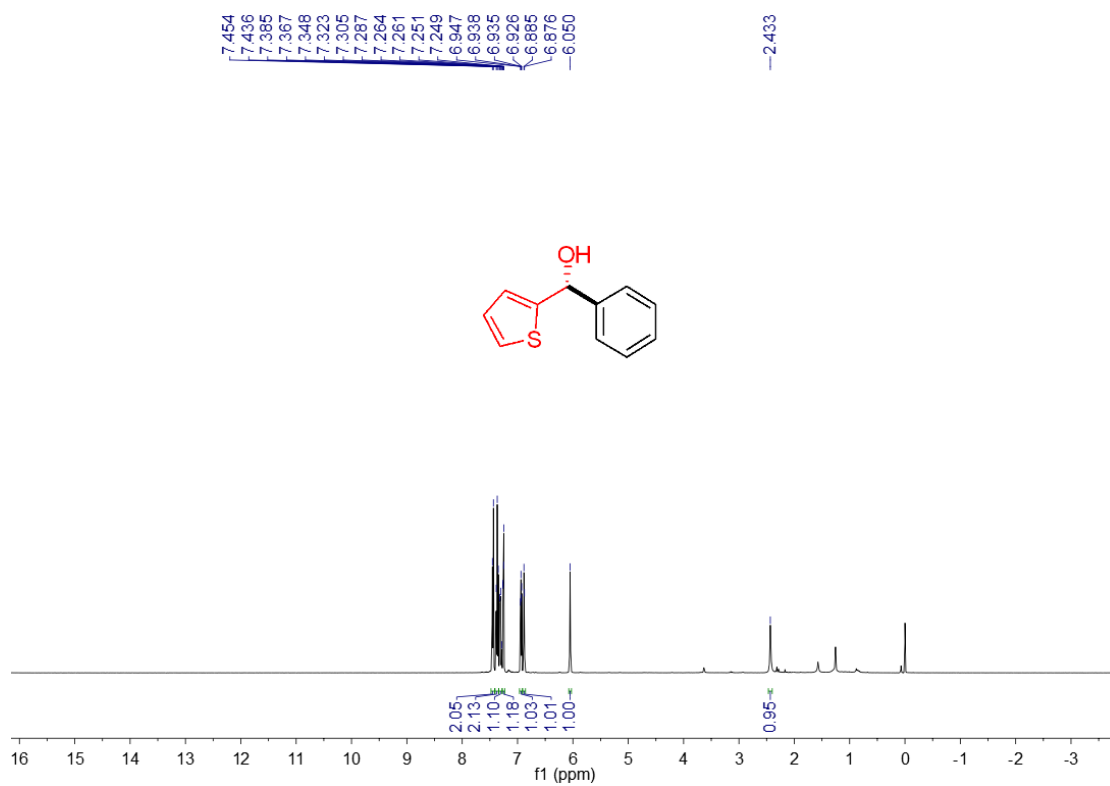



$^{13}\text{C}$  NMR spectrum of compound **3r** (100 MHz) in  $\text{CDCl}_3$

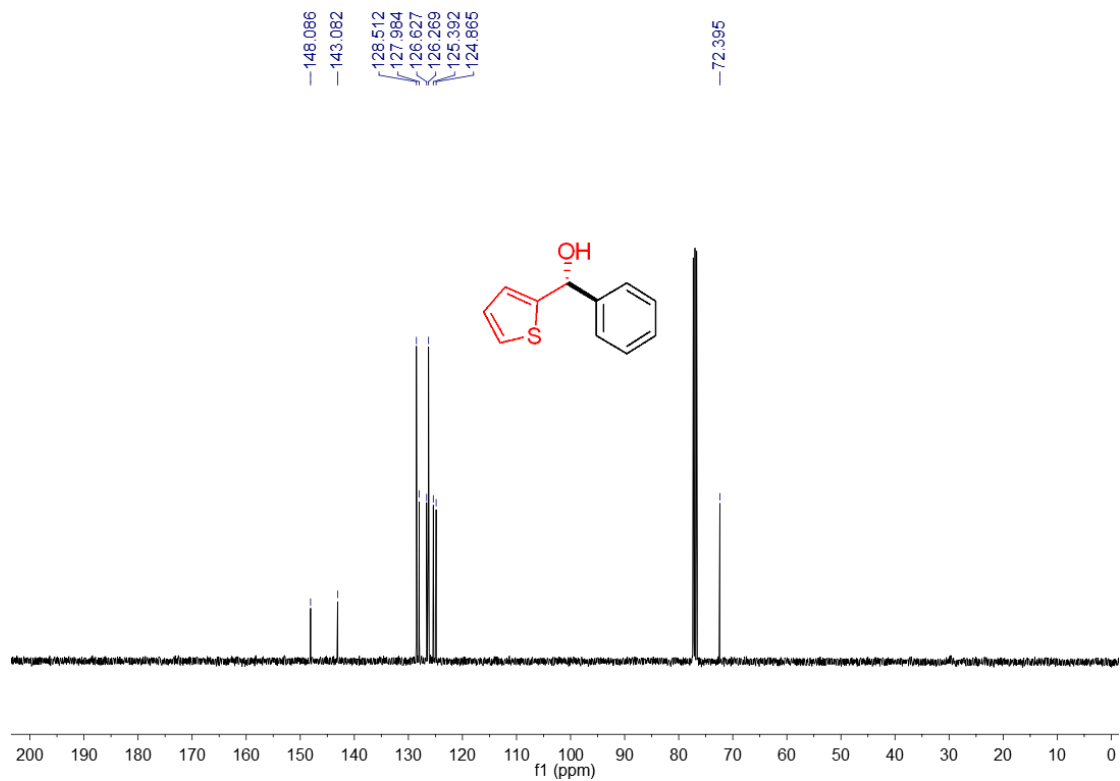

$^1\text{H}$  NMR spectrum of compound **3s** (400 MHz) in  $\text{CDCl}_3$

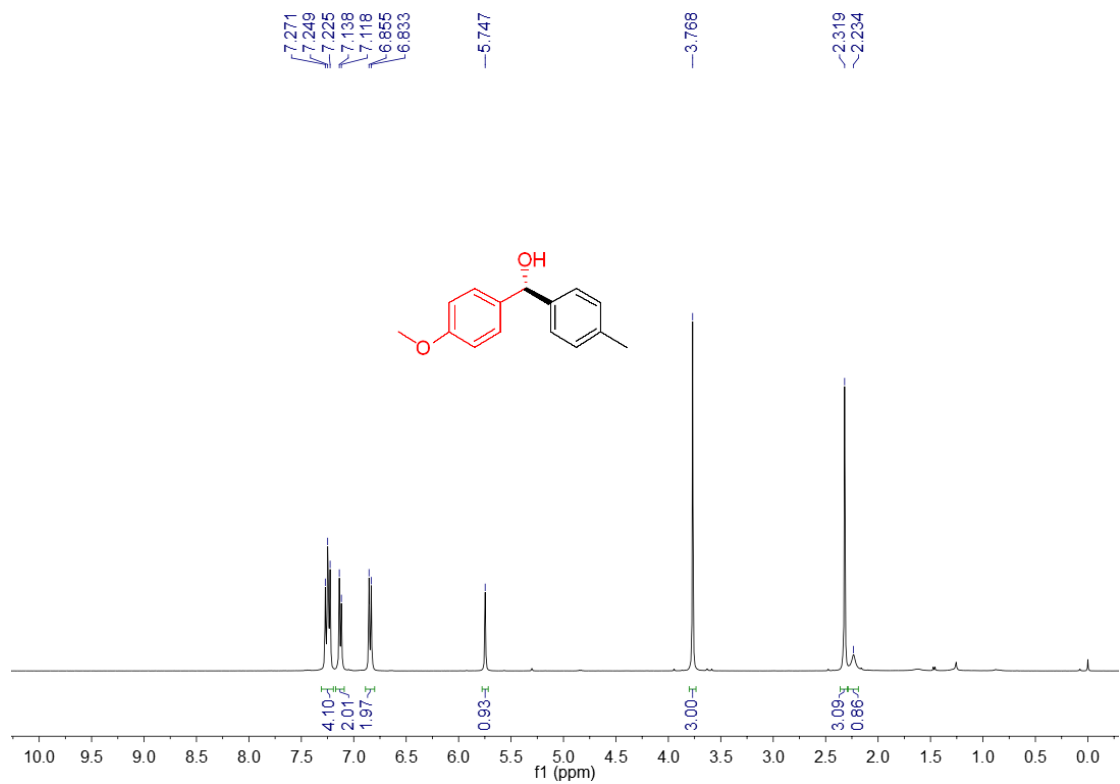

$^{13}\text{C}$  NMR spectrum of compound **3s** (100 MHz) in  $\text{CDCl}_3$

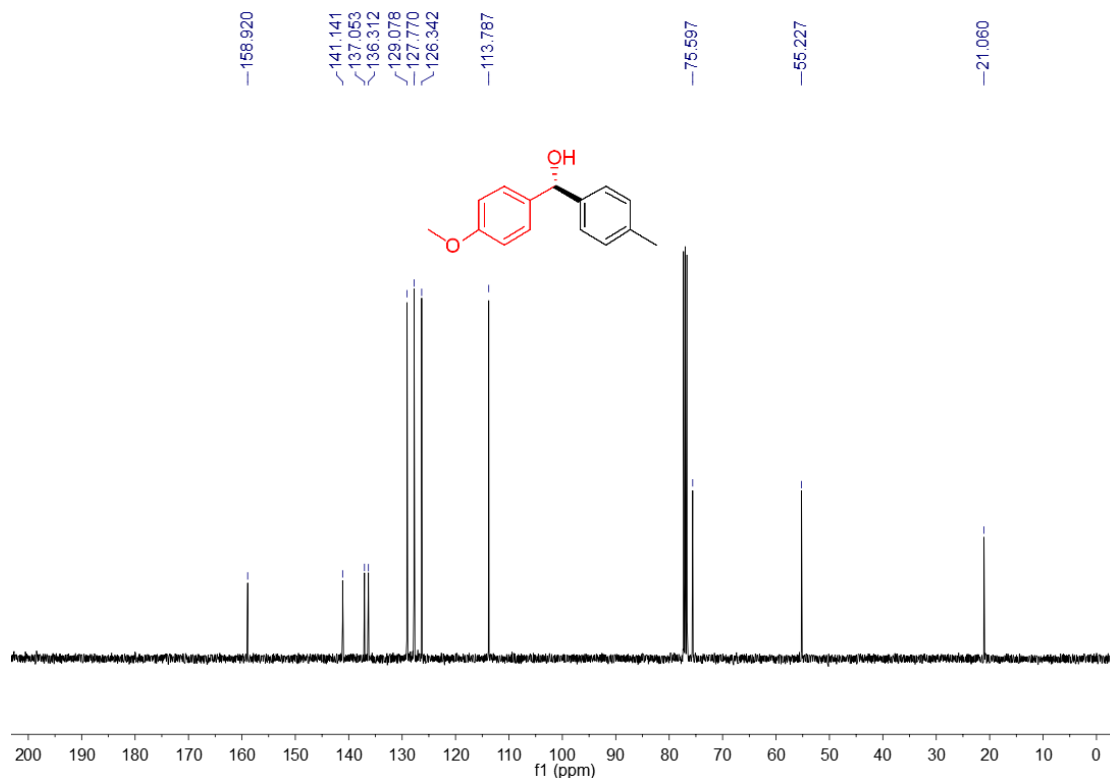

$^1\text{H}$  NMR spectrum of compound **3t** (400 MHz) in  $\text{CDCl}_3$

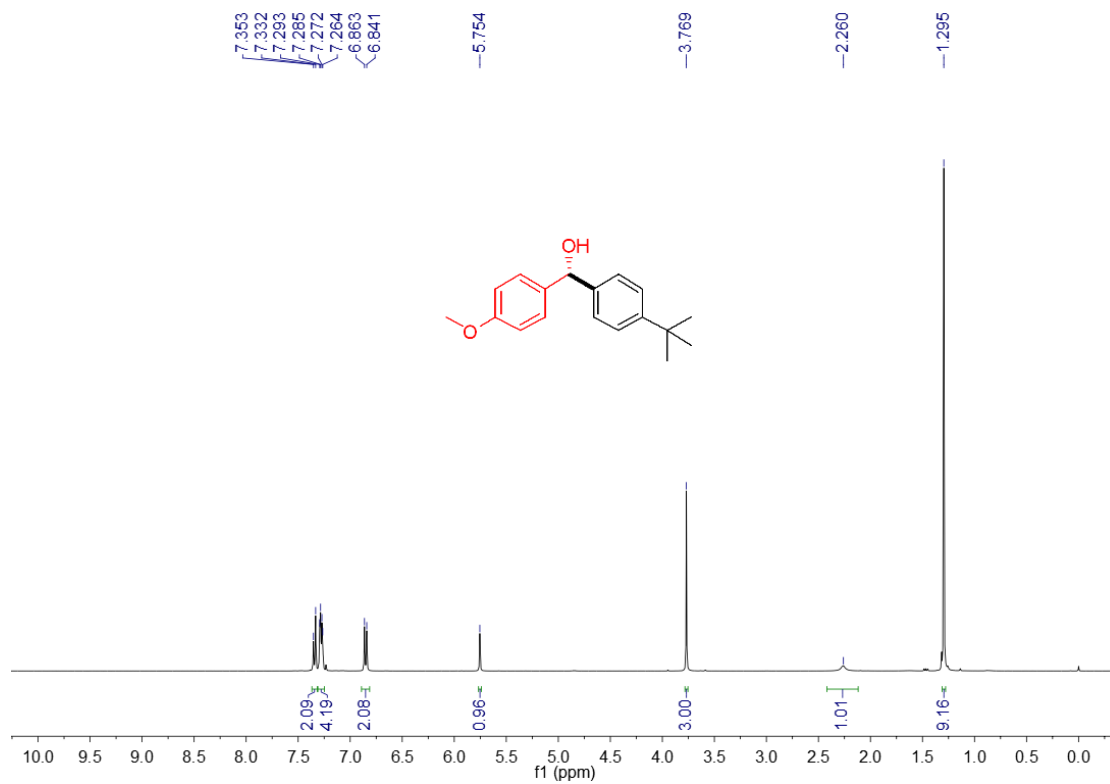

$^{13}\text{C}$  NMR spectrum of compound **3t** (100 MHz) in  $\text{CDCl}_3$

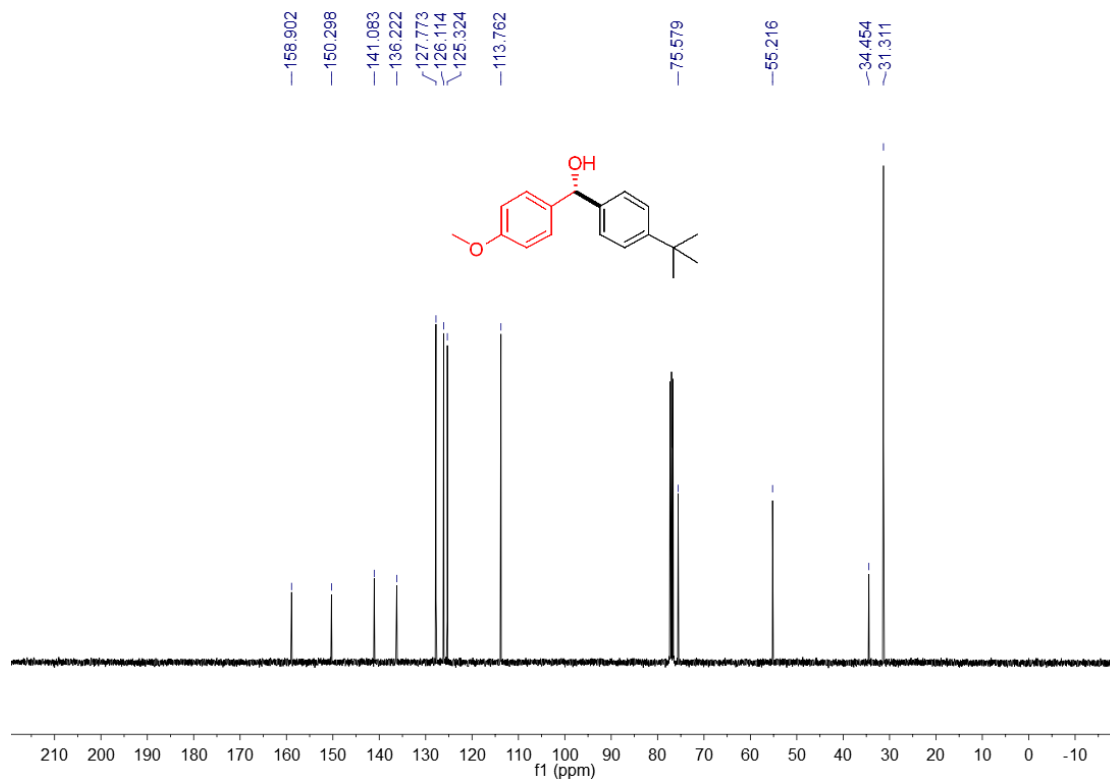

$^1\text{H}$  NMR spectrum of compound **3u** (400 MHz) in  $\text{CDCl}_3$

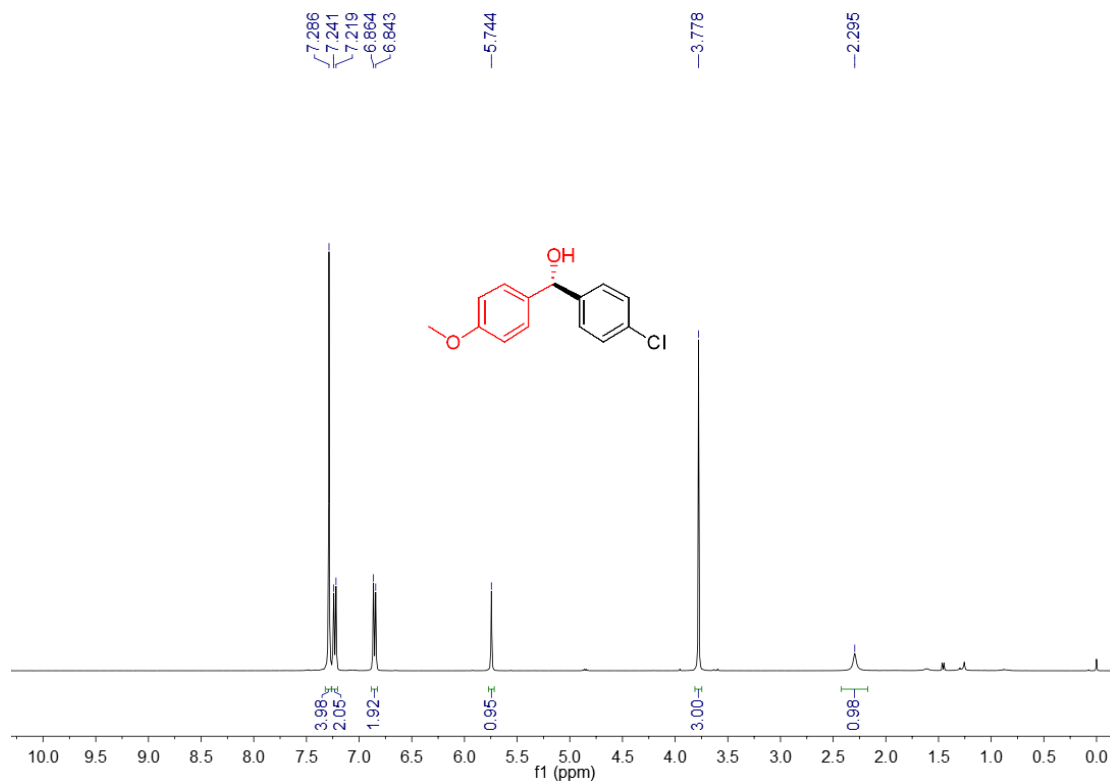

$^{13}\text{C}$  NMR spectrum of compound **3u** (100 MHz) in  $\text{CDCl}_3$

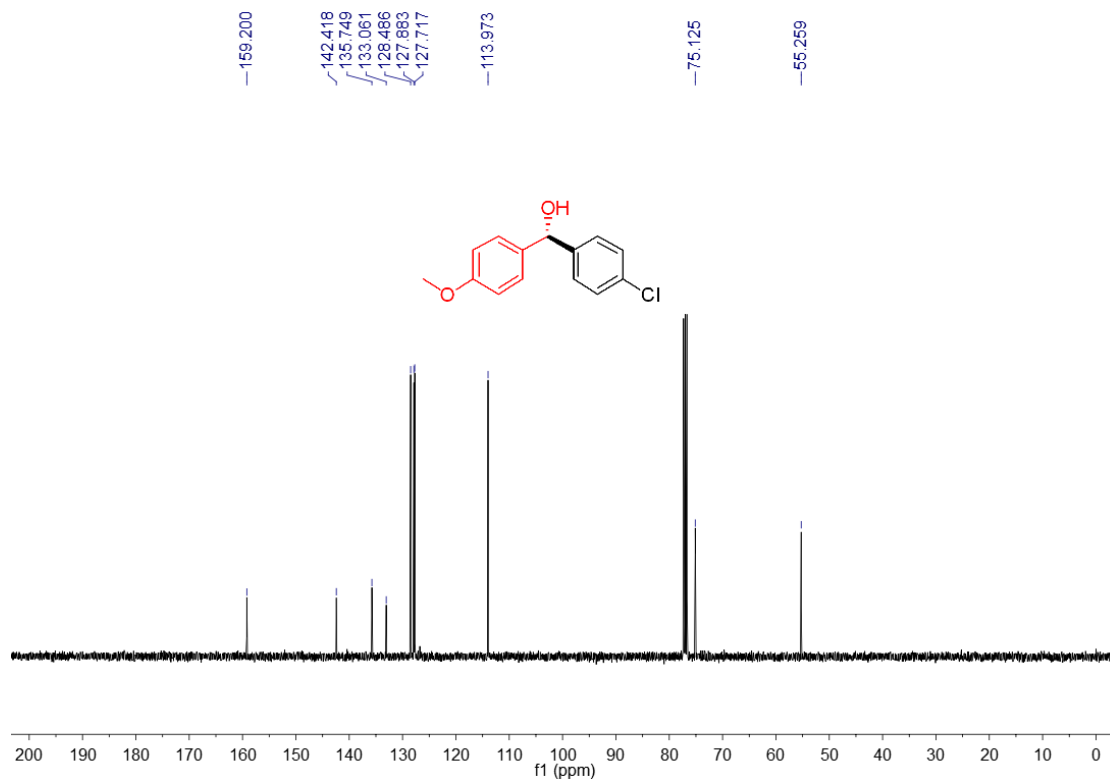

$^1\text{H}$  NMR spectrum of compound **3v** (400 MHz) in  $\text{CDCl}_3$

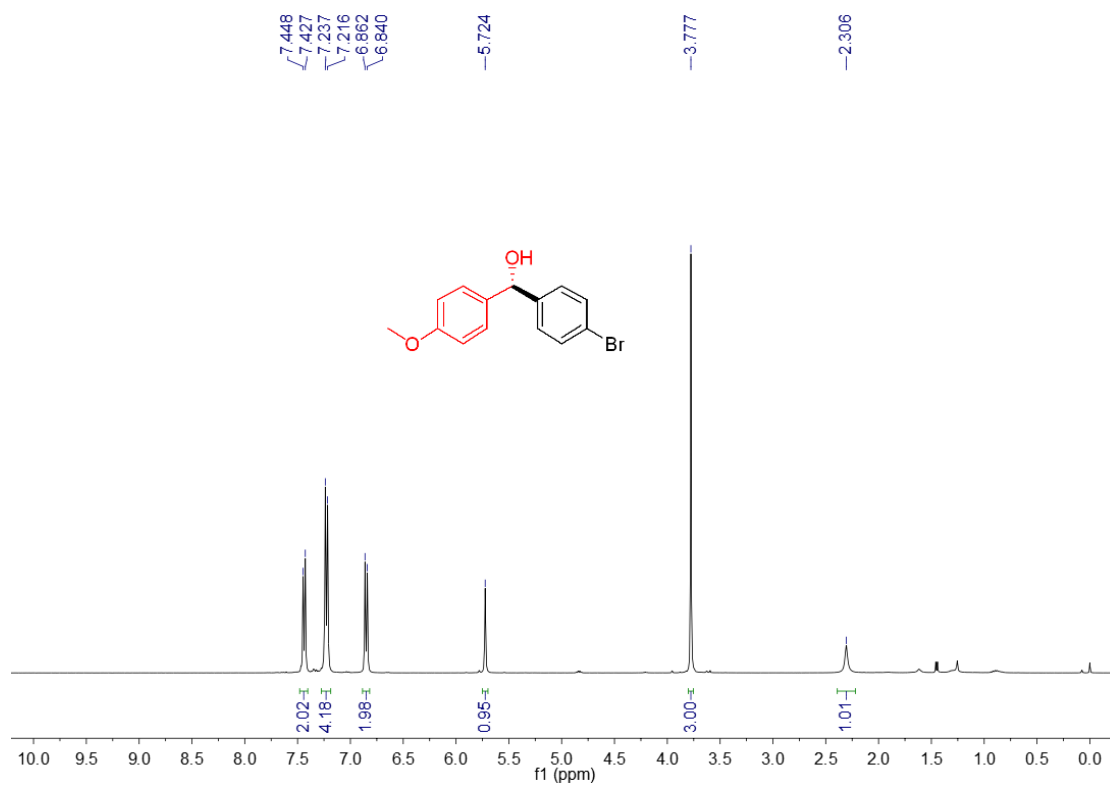

$^{13}\text{C}$  NMR spectrum of compound **3v** (100 MHz) in  $\text{CDCl}_3$

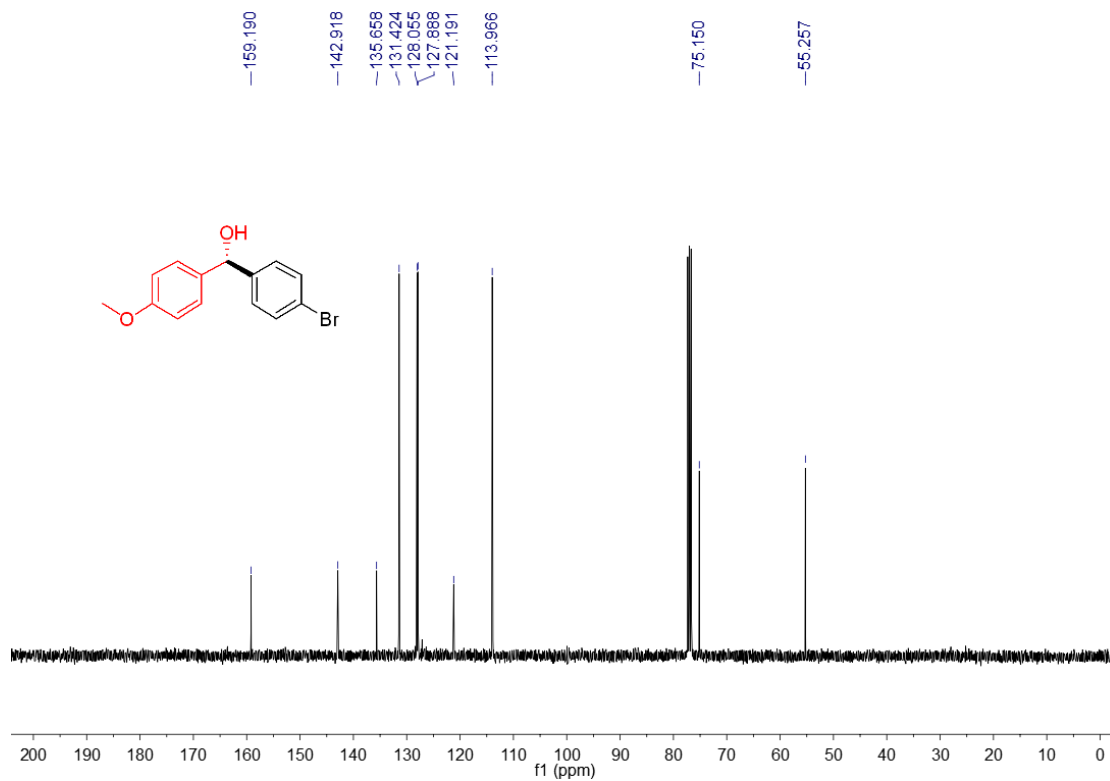

$^1\text{H}$  NMR spectrum of compound **3w** (400 MHz) in  $\text{CDCl}_3$

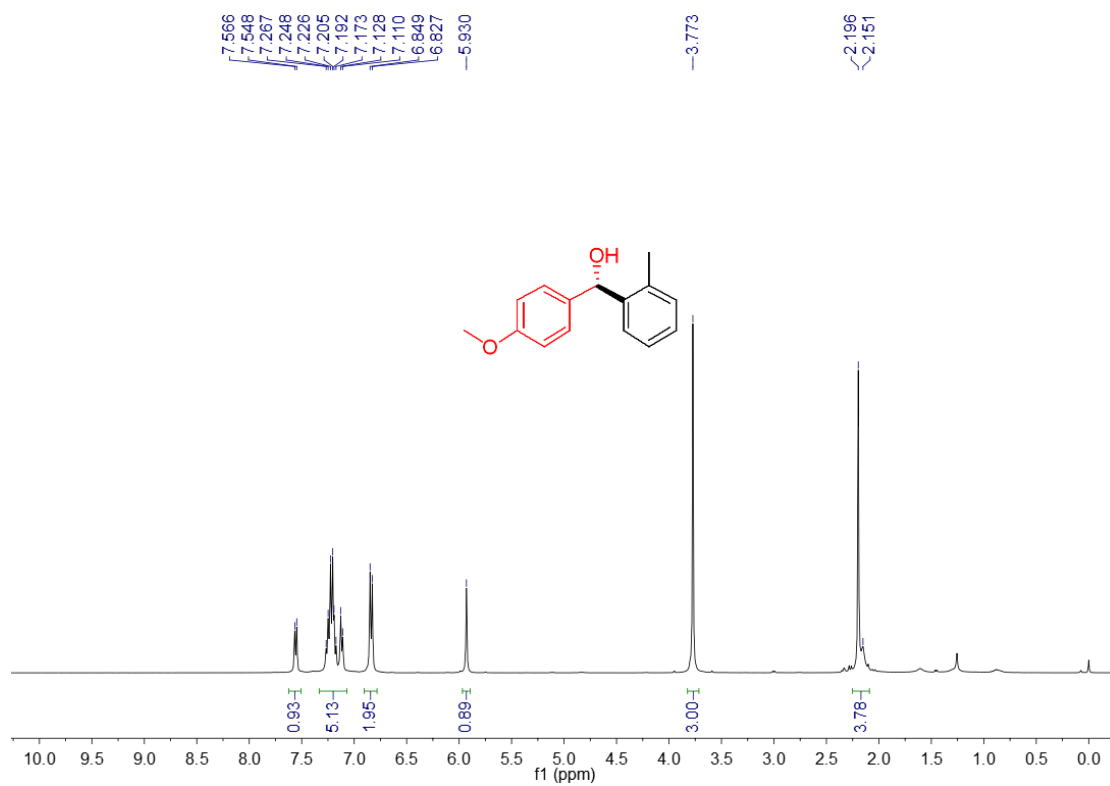

$^{13}\text{C}$  NMR spectrum of compound **3w** (100 MHz) in  $\text{CDCl}_3$

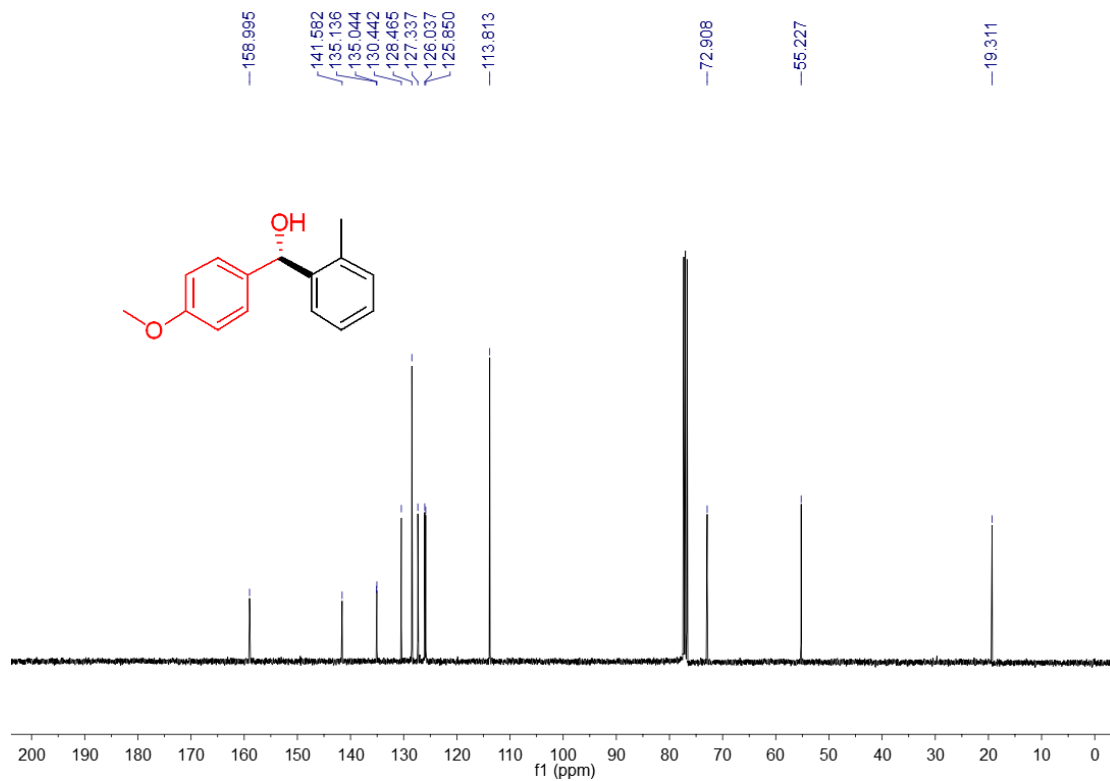

$^1\text{H}$  NMR spectrum of compound **3x** (400 MHz) in  $\text{CDCl}_3$

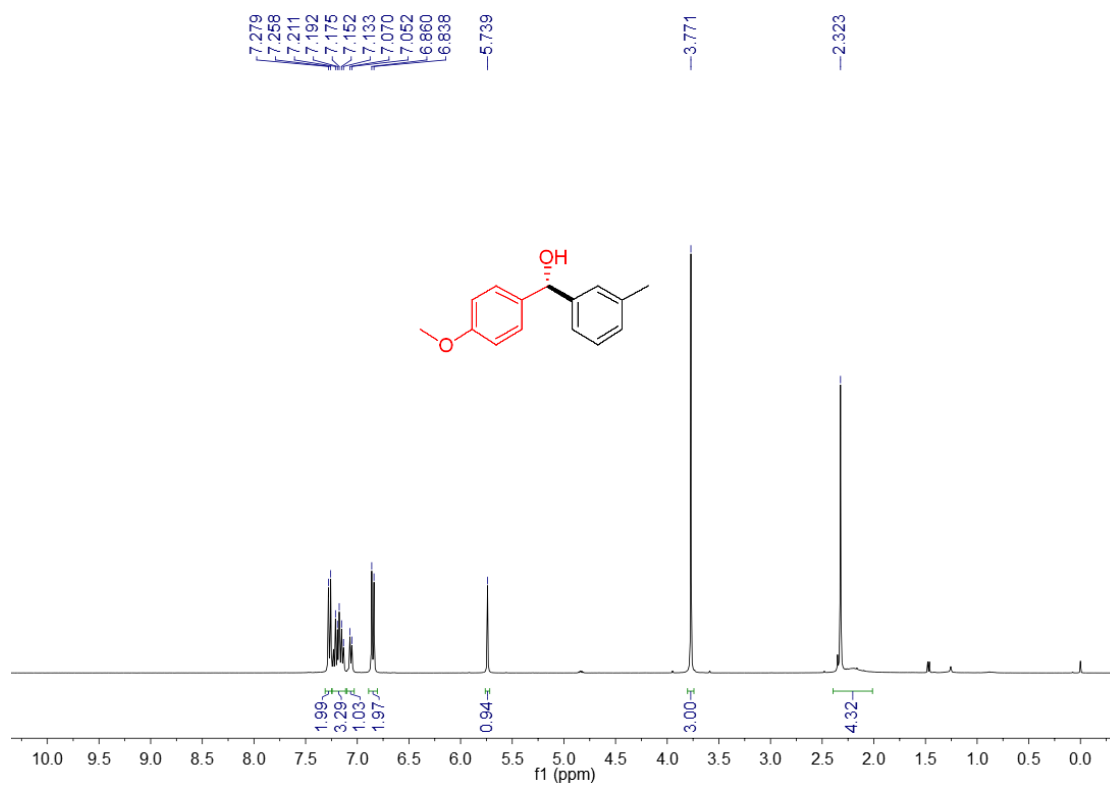

$^{13}\text{C}$  NMR spectrum of compound **3x** (100 MHz) in  $\text{CDCl}_3$

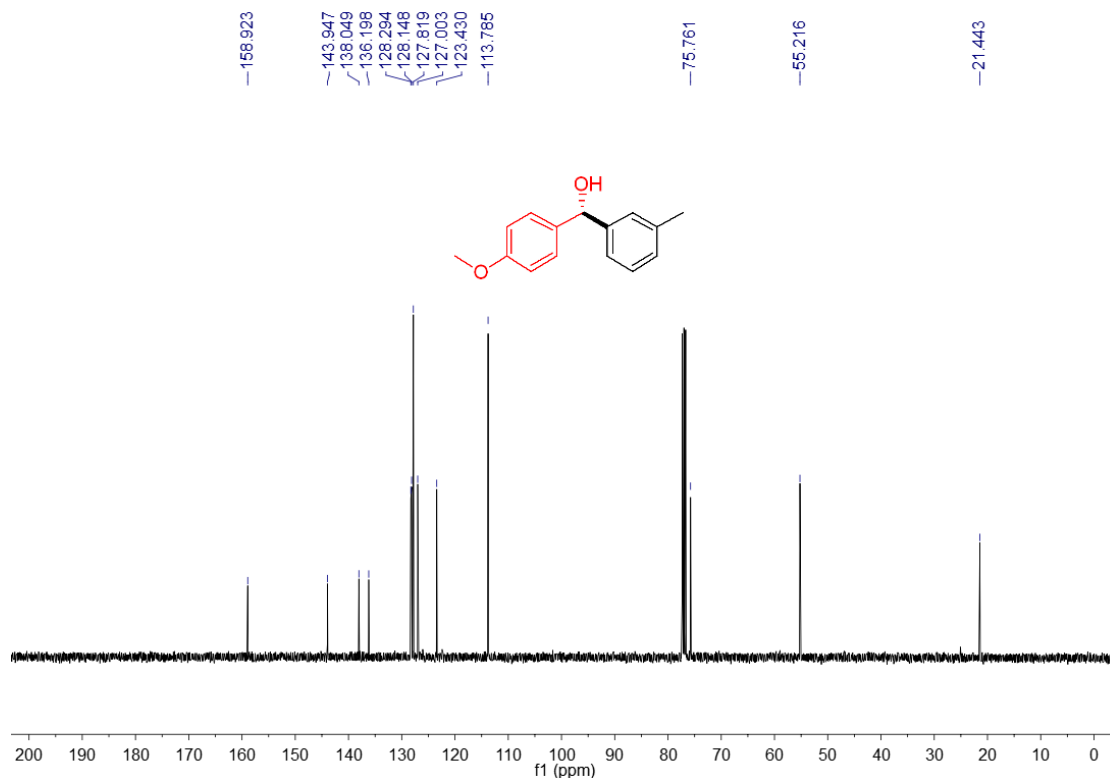

$^1\text{H}$  NMR spectrum of compound **3y** (400 MHz) in  $\text{CDCl}_3$

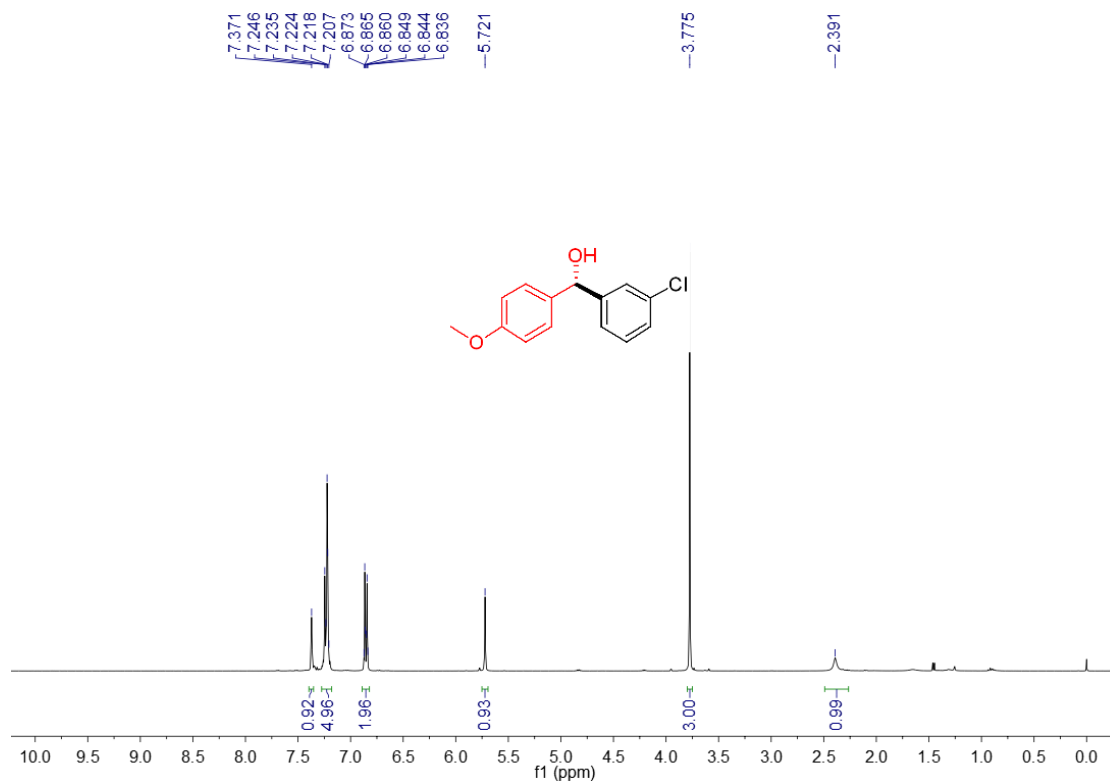

$^{13}\text{C}$  NMR spectrum of compound **3y** (100 MHz) in  $\text{CDCl}_3$

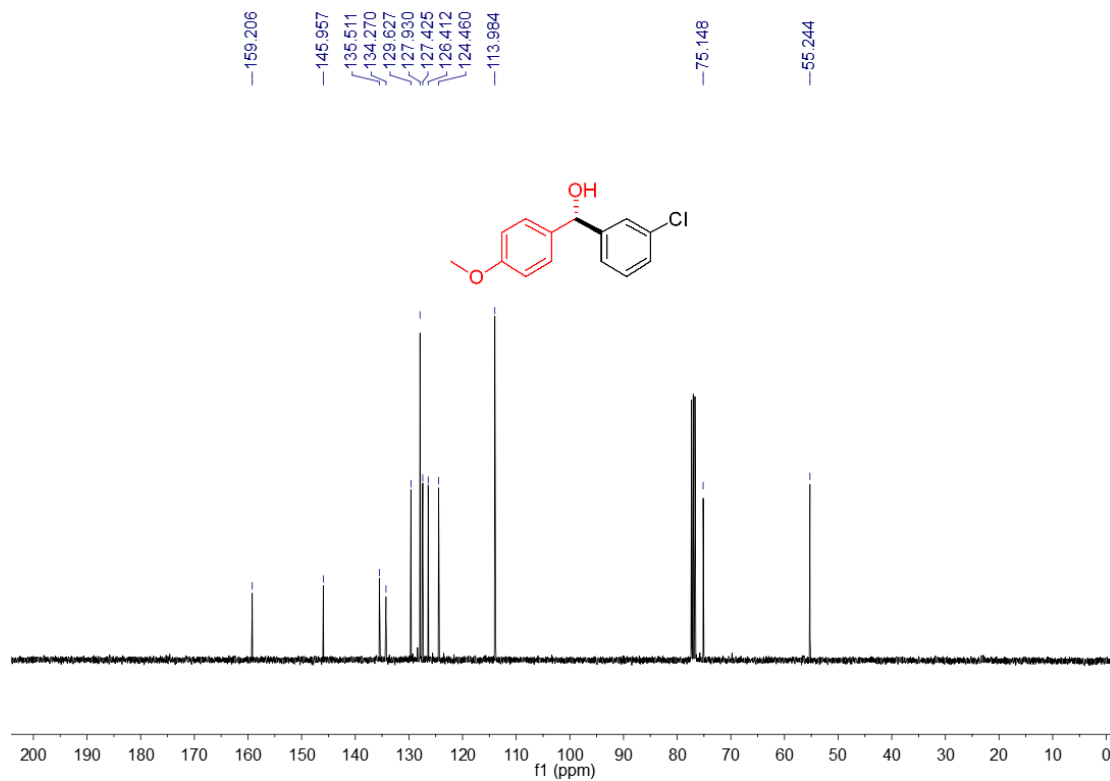

$^1\text{H}$  NMR spectrum of compound **3z** (400 MHz) in  $\text{CDCl}_3$

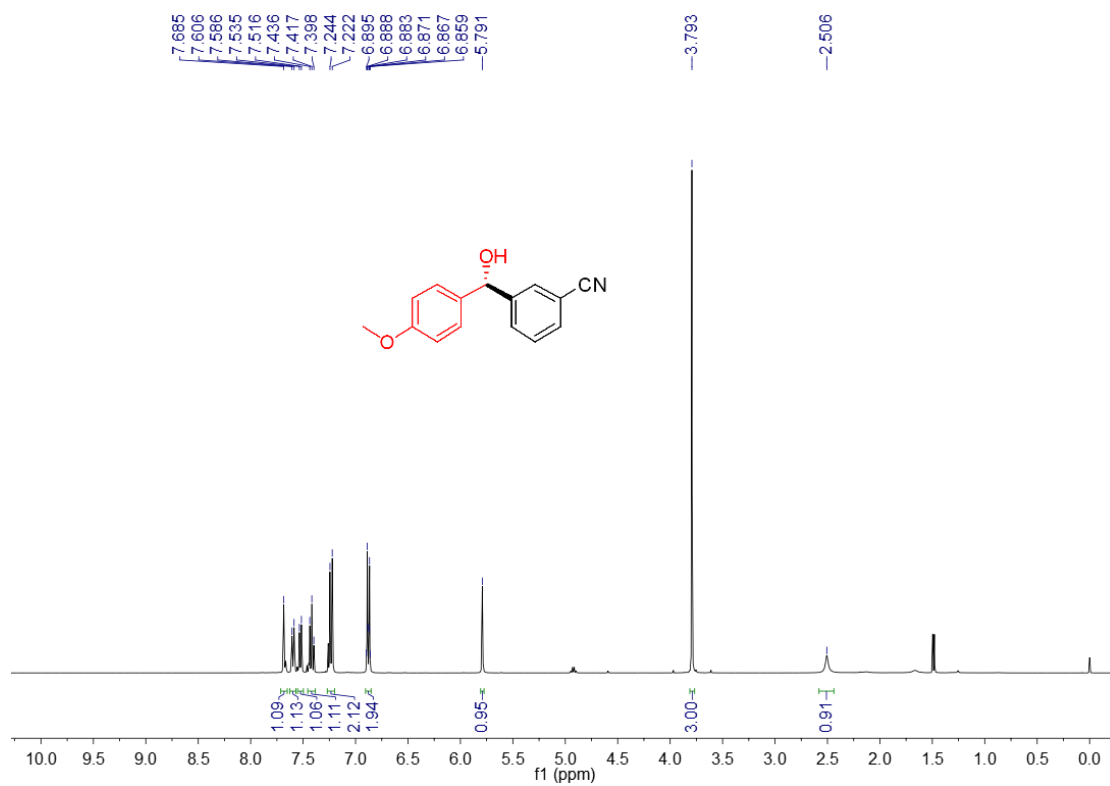



$^{13}\text{C}$  NMR spectrum of compound **3z** (100 MHz) in  $\text{CDCl}_3$

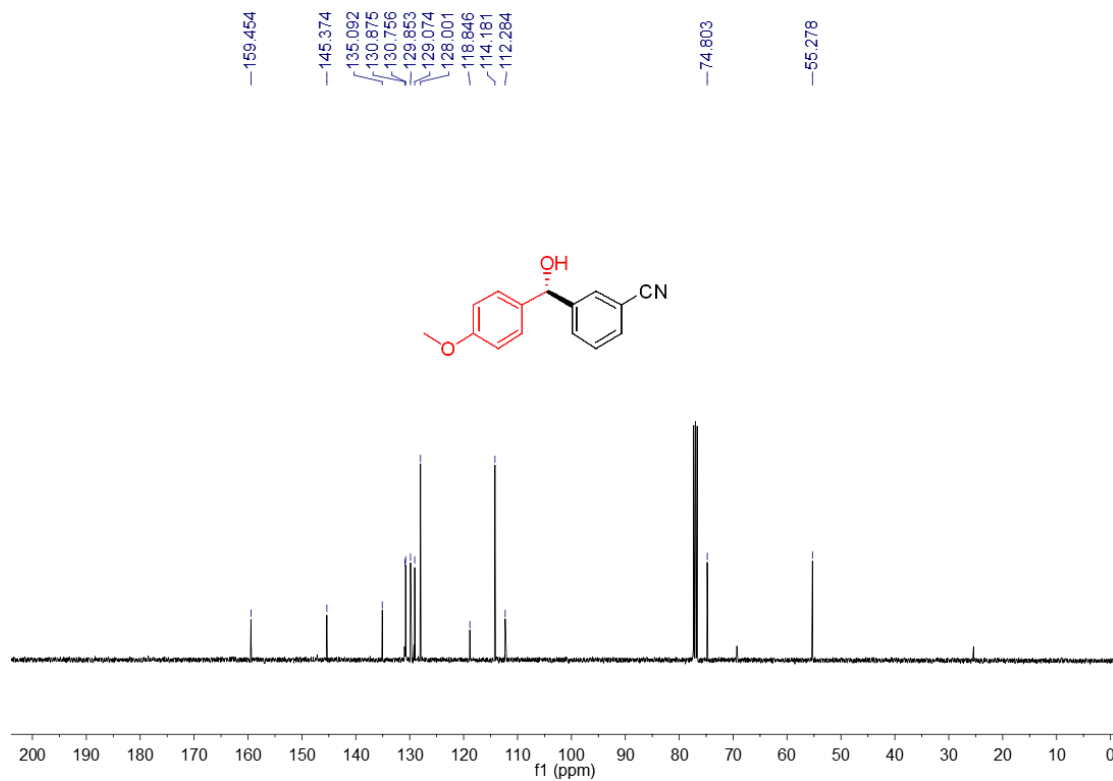

$^1\text{H}$  NMR spectrum of compound **3aa** (400 MHz) in  $\text{CDCl}_3$

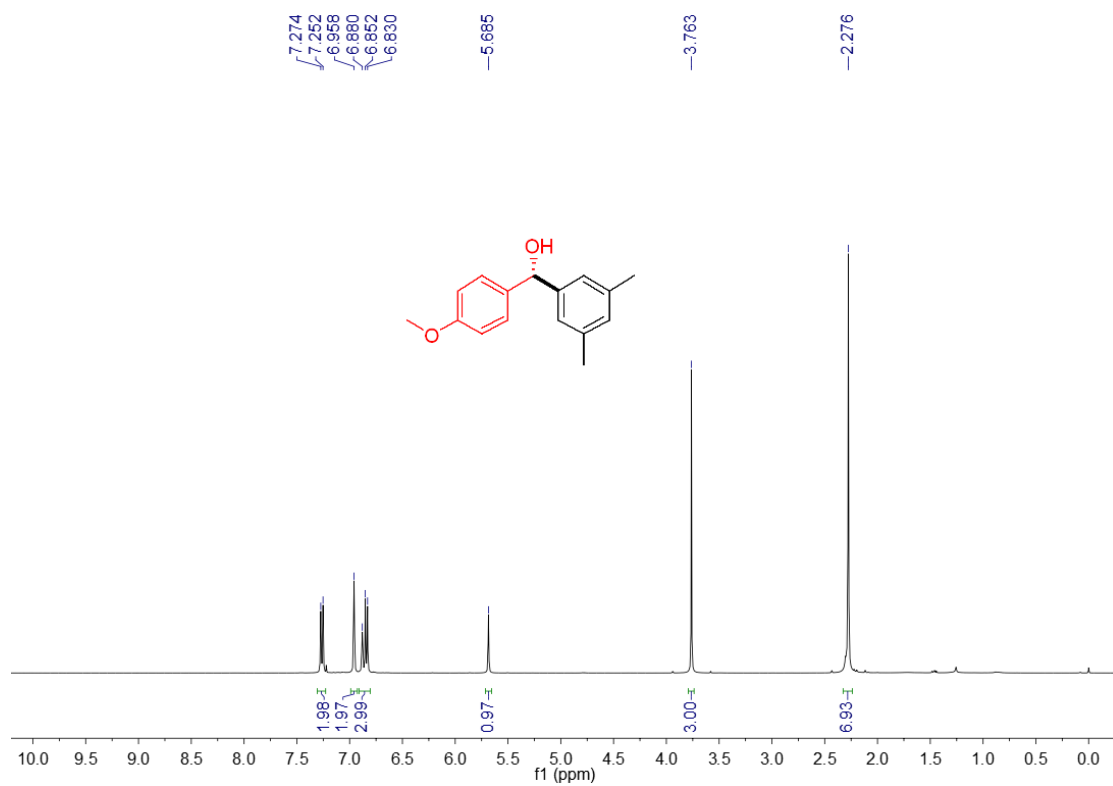

<sup>13</sup>C NMR spectrum of compound **3aa** (100 MHz) in CDCl<sub>3</sub>

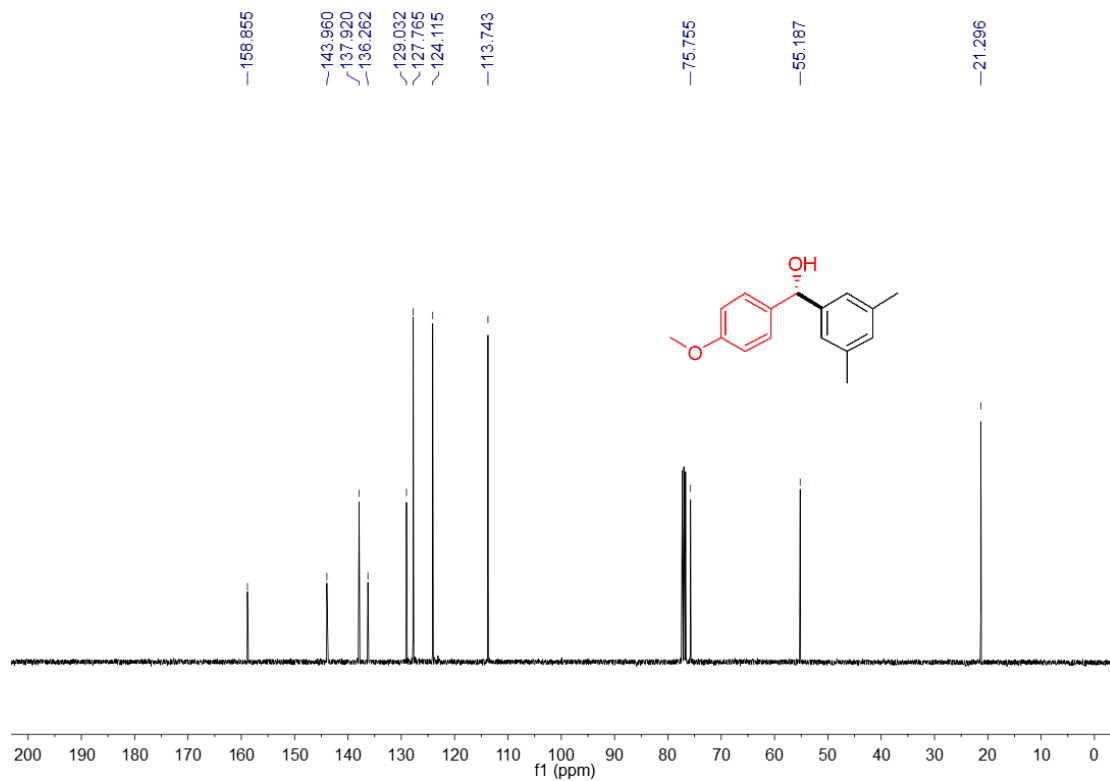

<sup>1</sup>H NMR spectrum of compound **3ab** (400 MHz) in CDCl<sub>3</sub>

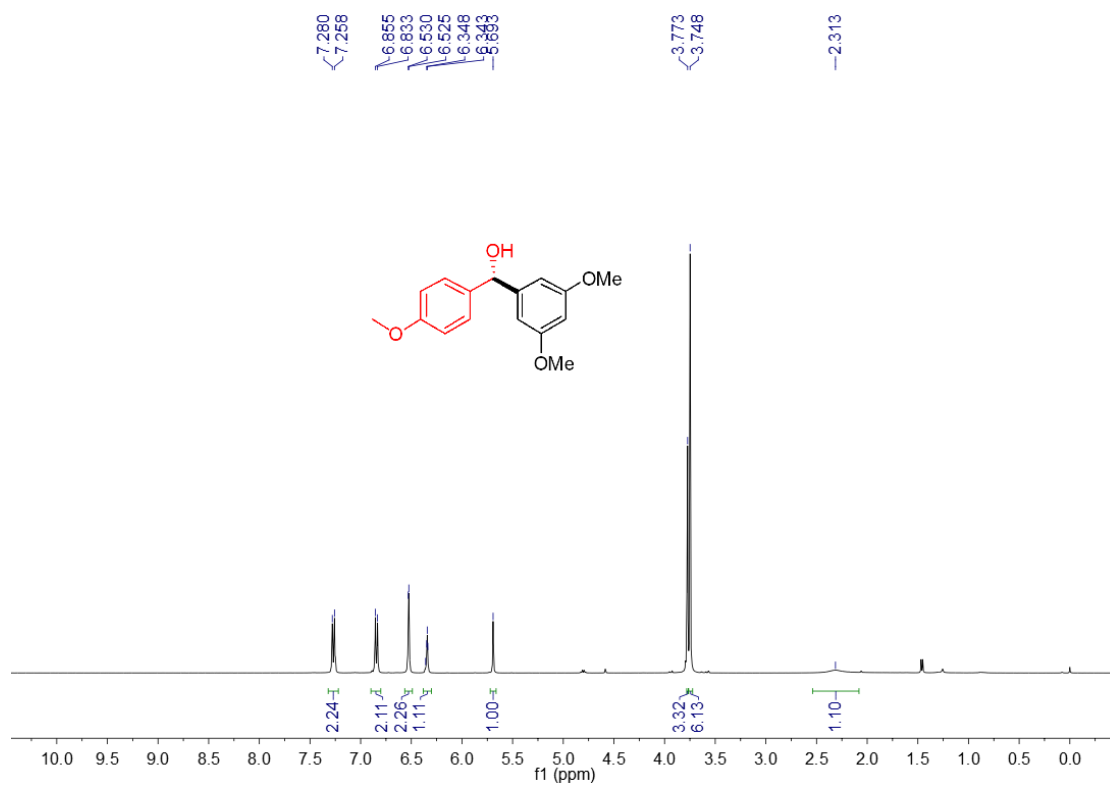

$^{13}\text{C}$  NMR spectrum of compound **3ab** (100 MHz) in  $\text{CDCl}_3$

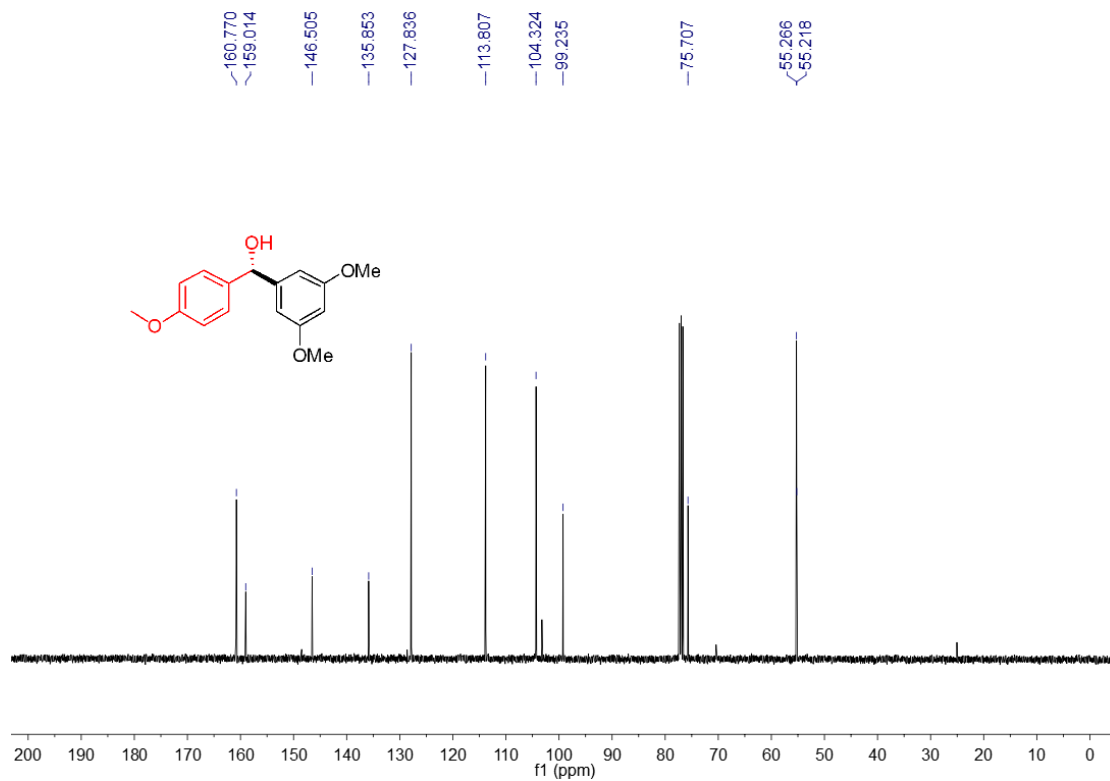

$^1\text{H}$  NMR spectrum of compound **3ac** (400 MHz) in  $\text{CDCl}_3$

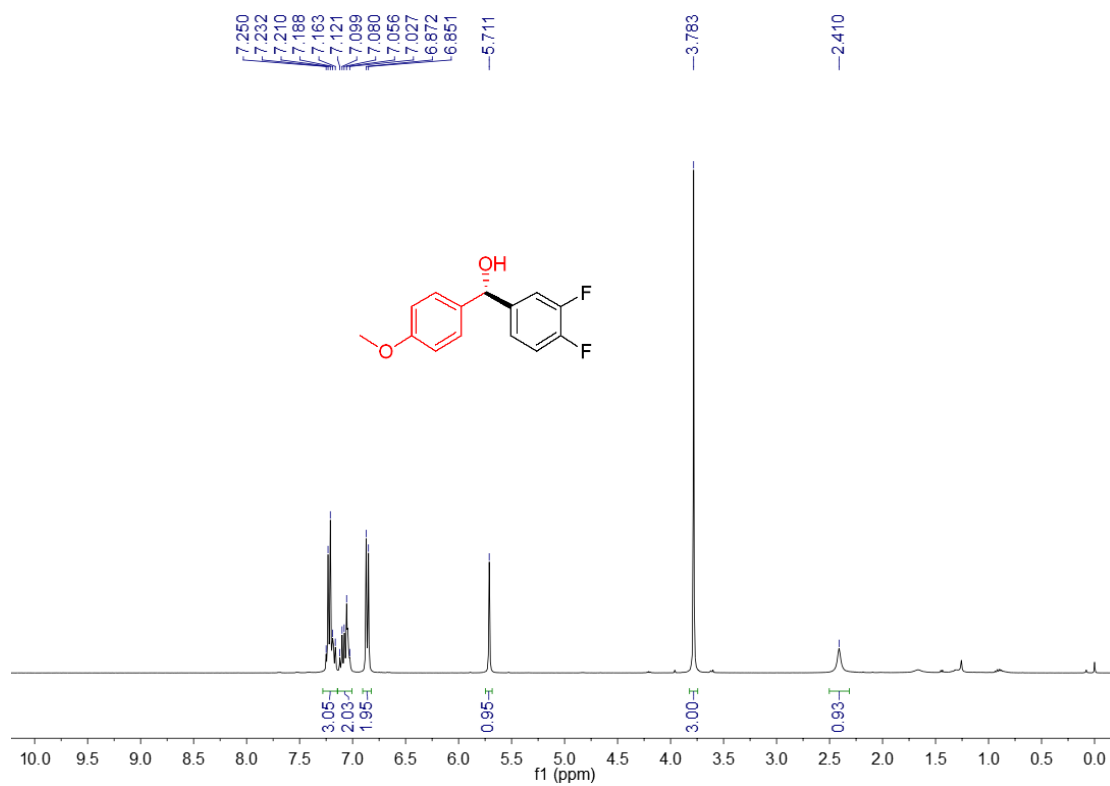

$^{13}\text{C}$  NMR spectrum of compound **3ac** (100 MHz) in  $\text{CDCl}_3$

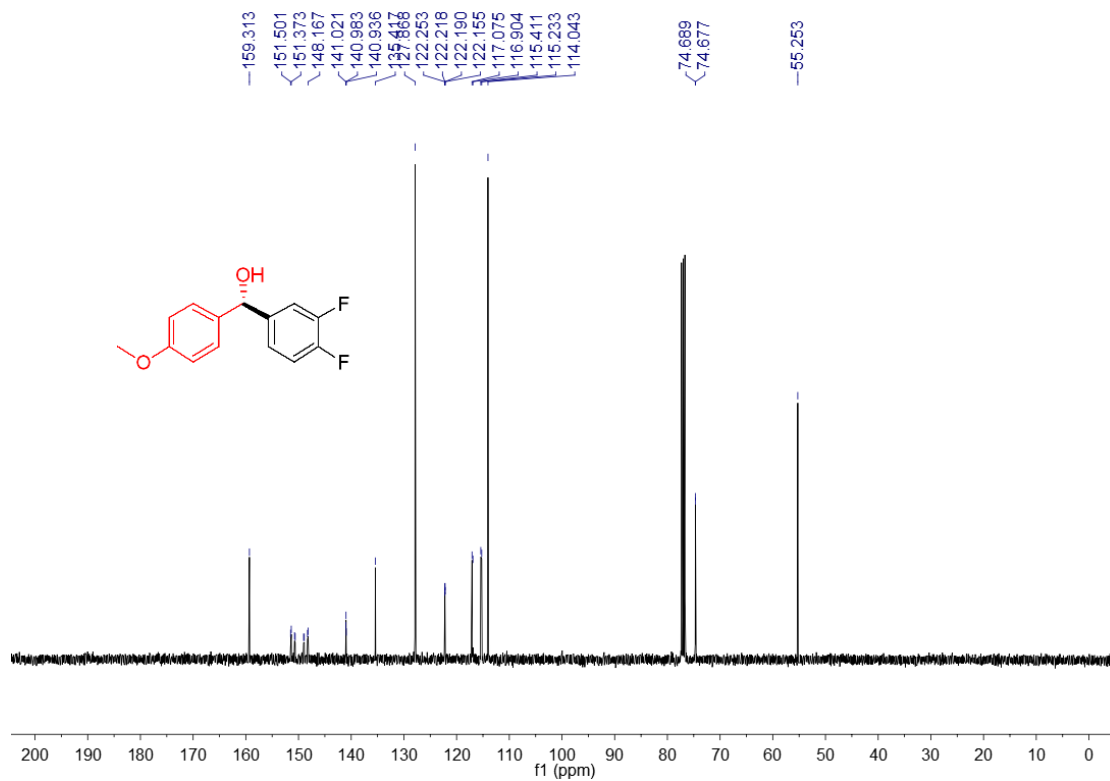

$^{19}\text{F}$  NMR spectrum of compound **3ac** (376 MHz) in  $\text{CDCl}_3$

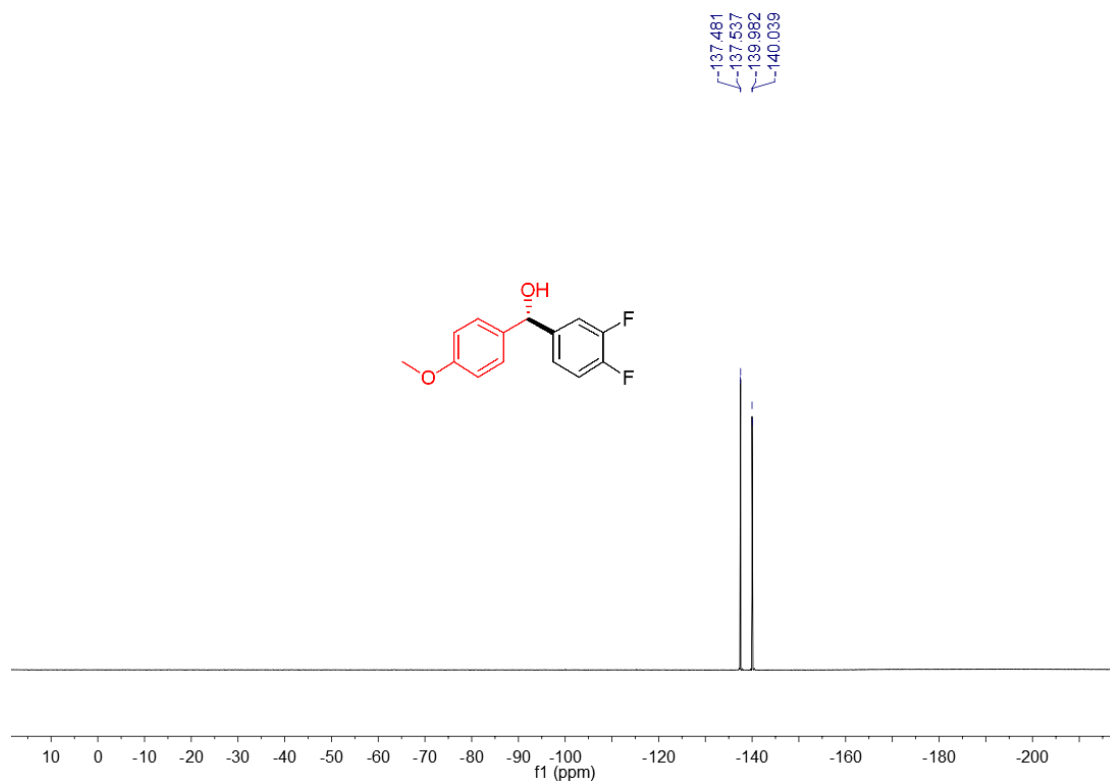

$^1\text{H}$  NMR spectrum of compound **3ad** (400 MHz) in  $\text{CDCl}_3$

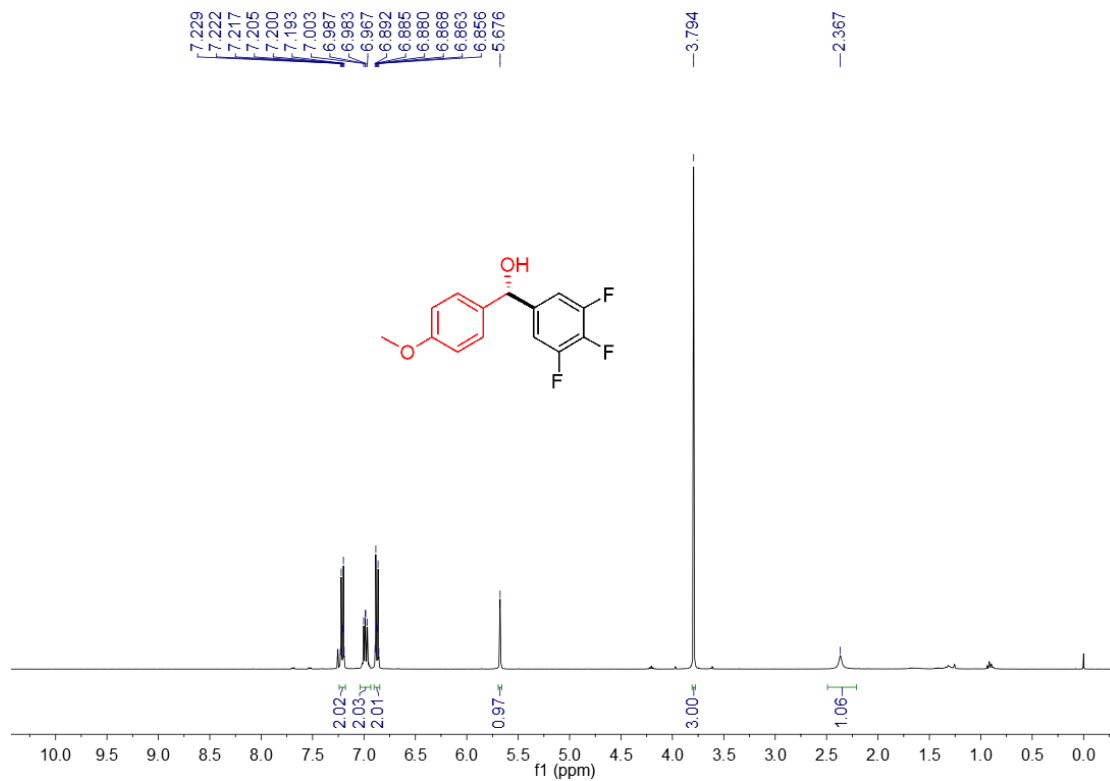

$^{13}\text{C}$  NMR spectrum of compound **3ad** (100 MHz) in  $\text{CDCl}_3$

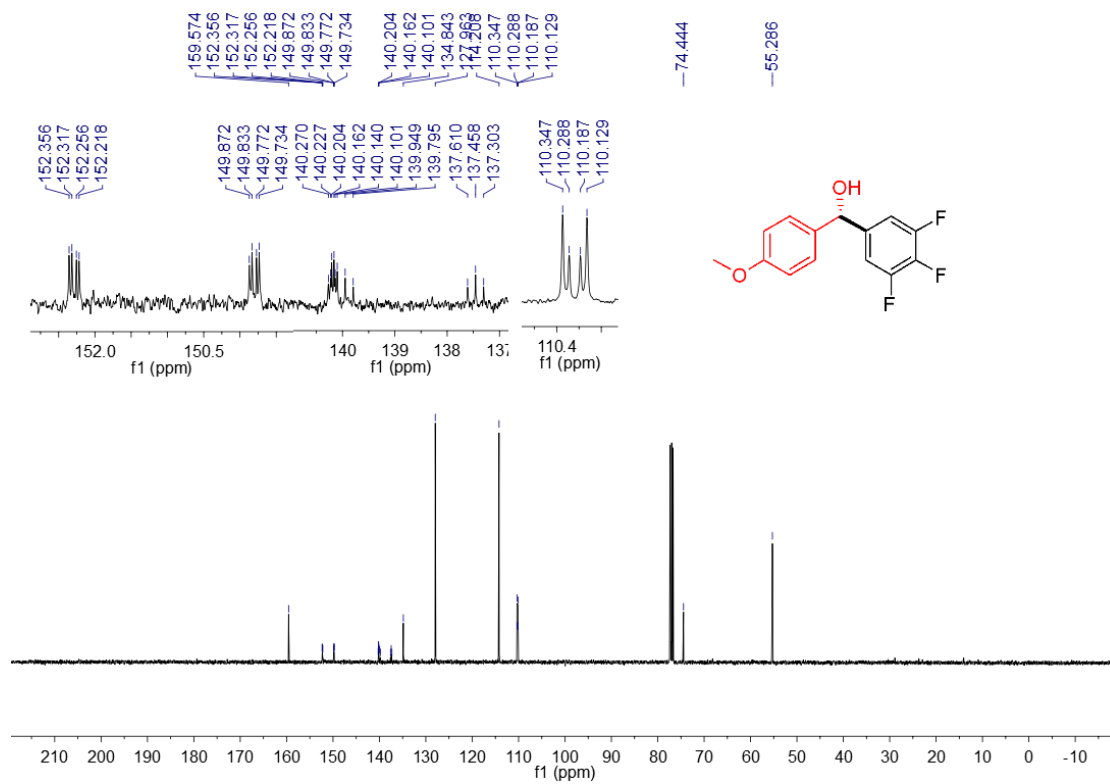

$^{19}\text{F}$  NMR spectrum of compound **3ad** (376 MHz) in  $\text{CDCl}_3$

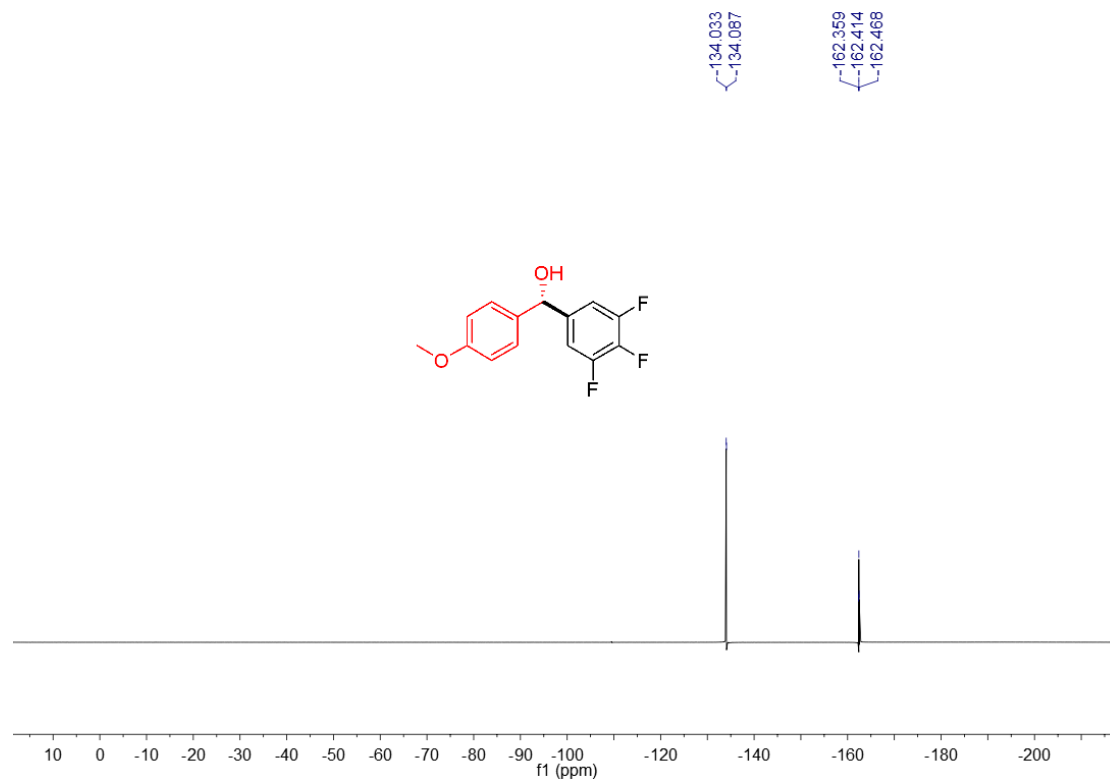

## 10. Copies of HPLC Spectra for the Products

Chiral HPLC spectrum of compound 3a

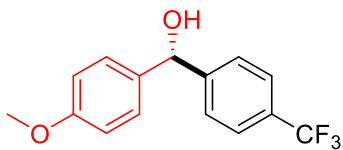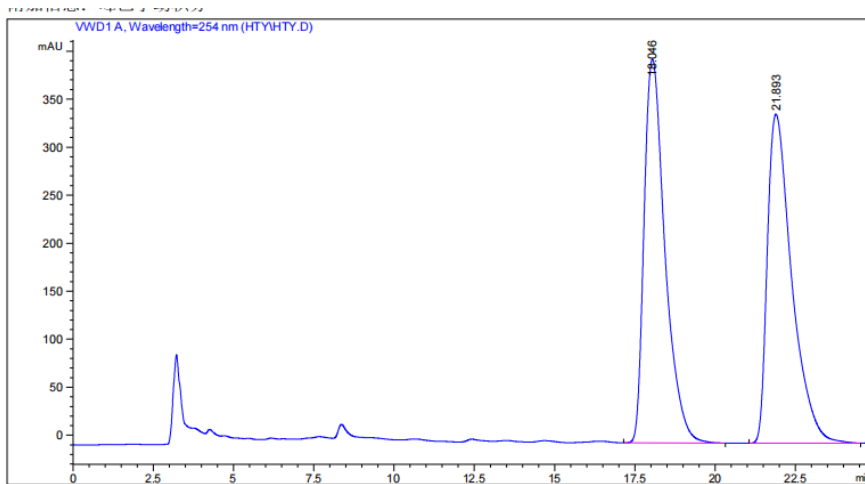

|   | RT (min) | Height [mAU] | Area [Mau*S] | Area%   |
|---|----------|--------------|--------------|---------|
| 1 | 18.046   | 399.69394    | 1.80911e4    | 49.9732 |
| 2 | 21.893   | 342.61975    | 1.81105e4    | 50.0268 |

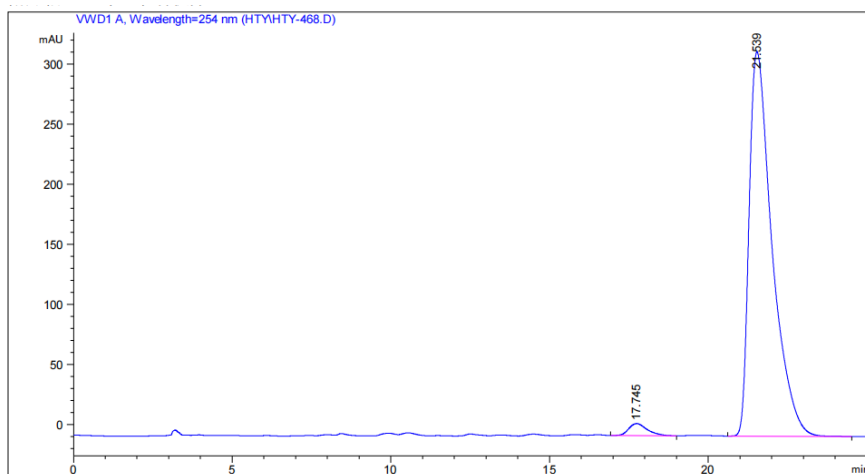

|   | RT (min) | Height [mAU] | Area [Mau*S] | Area%   |
|---|----------|--------------|--------------|---------|
| 1 | 17.745   | 10.02051     | 406.99588    | 2.4716  |
| 2 | 21.539   | 320.08087    | 1.60599e4    | 97.5284 |

Chiral HPLC spectrum of compound **3b**

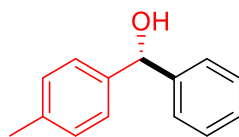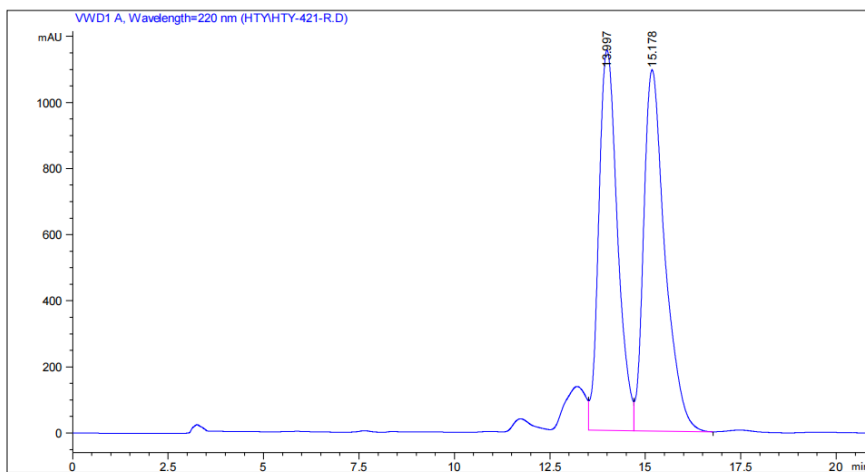

|   | RT (min) | Height [mAU] | Area [Mau*S] | Area%   |
|---|----------|--------------|--------------|---------|
| 1 | 13.997   | 1149.92651   | 3.91717e4    | 48.0597 |
| 2 | 15.178   | 1092.19092   | 4.23347e4    | 51.9403 |

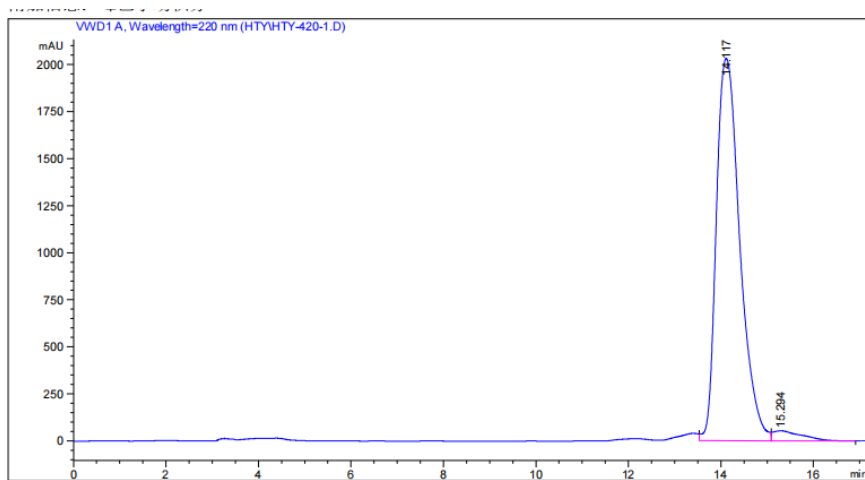

|   | RT (min) | Height [mAU] | Area [Mau*S] | Area%   |
|---|----------|--------------|--------------|---------|
| 1 | 14.117   | 2029.96167   | 7.18252e4    | 96.8639 |
| 2 | 15.294   | 52.91184     | 2325.42188   | 3.1361  |



Chiral HPLC spectrum of compound **3c**

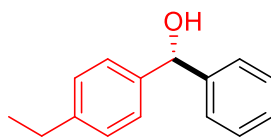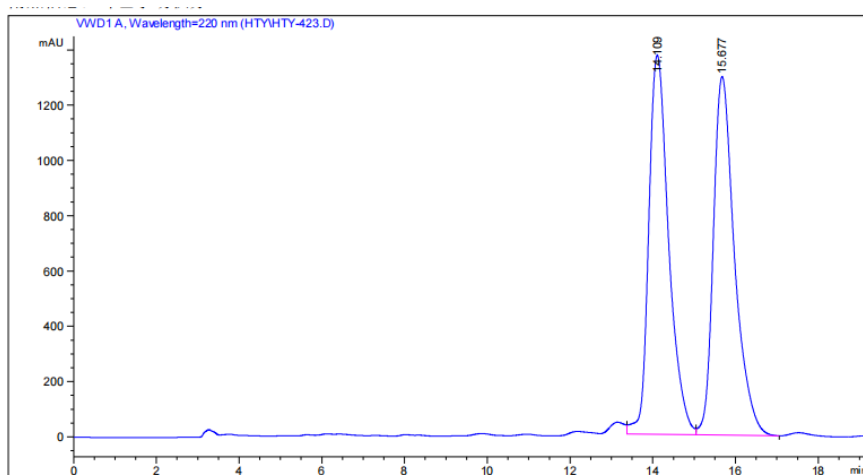

|   | RT (min) | Height [mAU] | Area [Mau*S] | Area%   |
|---|----------|--------------|--------------|---------|
| 1 | 14.109   | 1371.14526   | 4.60885e4    | 49.9372 |
| 2 | 15.677   | 1297.07898   | 4.62045e4    | 50.0628 |

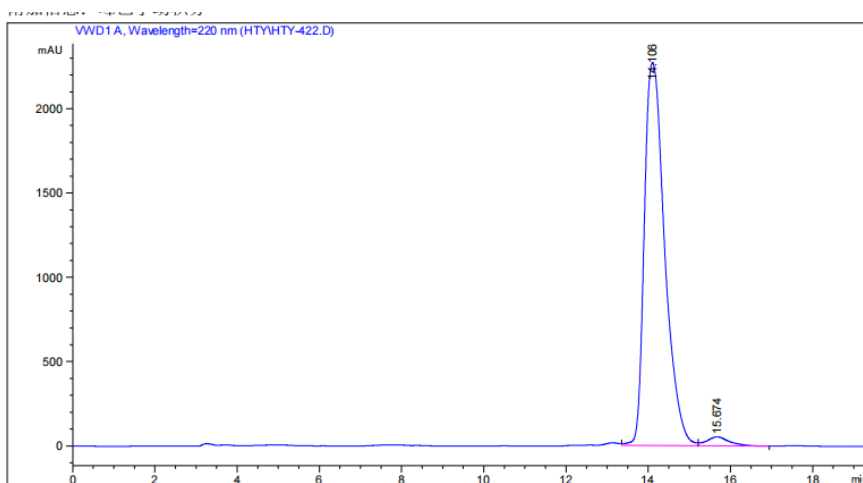

|   | RT (min) | Height [mAU] | Area [Mau*S] | Area%   |
|---|----------|--------------|--------------|---------|
| 1 | 14.106   | 2269.35767   | 7.82337e4    | 97.4250 |
| 2 | 15.674   | 53.67068     | 2067.75659   | 2.5750  |

Chiral HPLC spectrum of compound **3d**

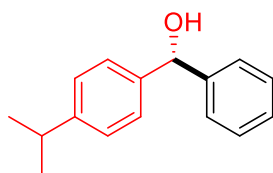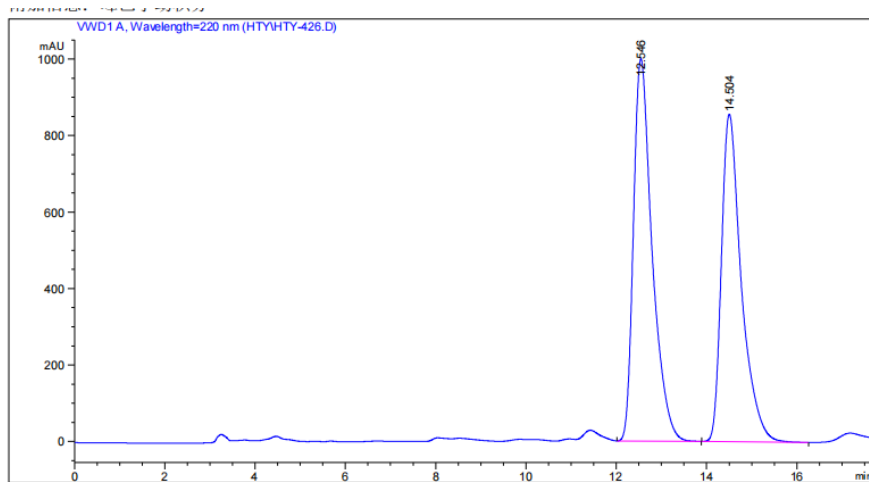

|   | RT (min) | Height [mAU] | Area [Mau*S] | Area%   |
|---|----------|--------------|--------------|---------|
| 1 | 12.546   | 999.17963    | 2.87273e4    | 52.2778 |
| 2 | 14.504   | 856.20819    | 2.62240e4    | 47.7222 |

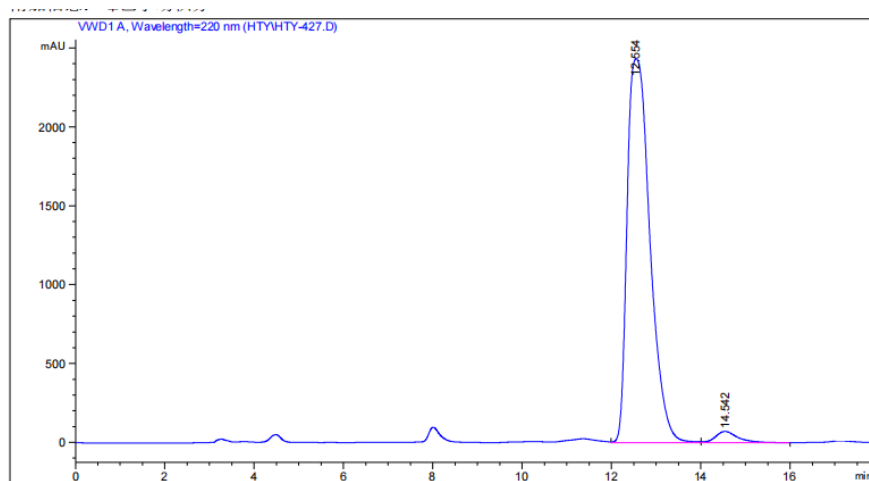

|   | RT (min) | Height [mAU] | Area [Mau*S] | Area%   |
|---|----------|--------------|--------------|---------|
| 1 | 12.554   | 2433.56543   | 8.60845e4    | 97.2246 |
| 2 | 14.542   | 70.85519     | 2457.39478   | 2.7754  |

Chiral HPLC spectrum of compound **3e**

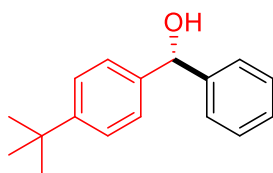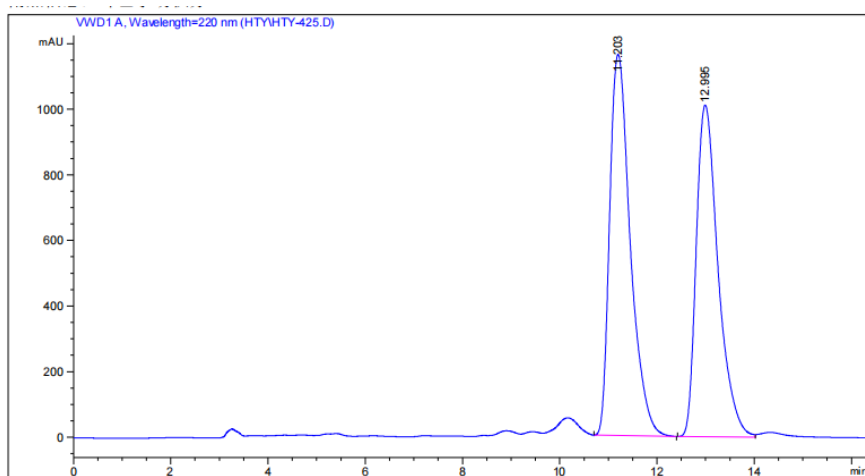

|   | RT (min) | Height [mAU] | Area [Mau*S] | Area%   |
|---|----------|--------------|--------------|---------|
| 1 | 11.203   | 1160.31628   | 3.42560e4    | 52.0714 |
| 2 | 12.995   | 1010.29730   | 3.15305e4    | 47.9286 |

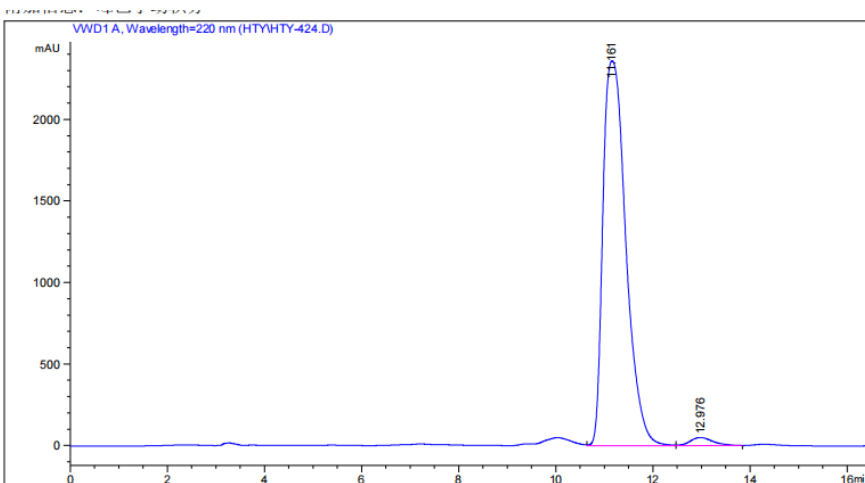

|   | RT (min) | Height [mAU] | Area [Mau*S] | Area%   |
|---|----------|--------------|--------------|---------|
| 1 | 11.161   | 2359.32397   | 7.73329e4    | 97.9705 |
| 2 | 12.976   | 49.26589     | 1602.01257   | 2.0295  |

Chiral HPLC spectrum of compound **3f**

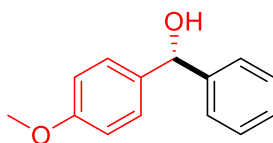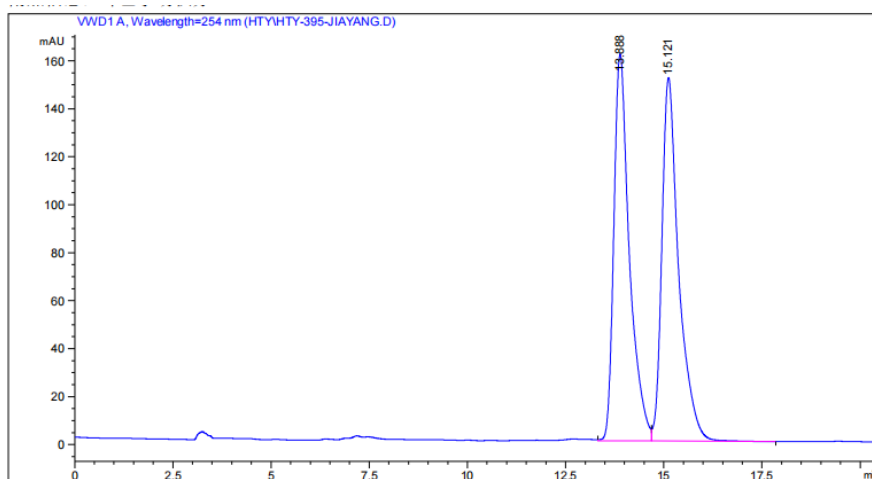

|   | RT (min) | Height [mAU] | Area [Mau*S] | Area%   |
|---|----------|--------------|--------------|---------|
| 1 | 13.888   | 161.20901    | 4445.65771   | 49.5749 |
| 2 | 15.121   | 151.46844    | 4521.89404   | 50.5251 |

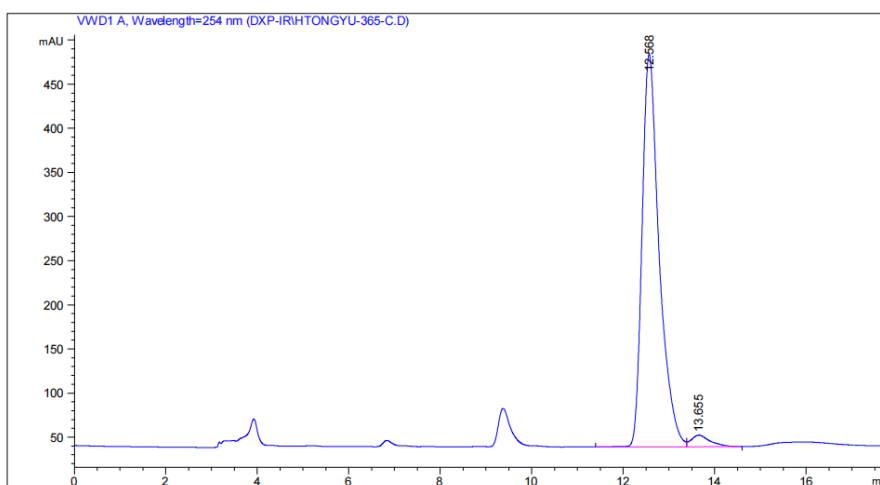

|   | RT (min) | Height [mAU] | Area [Mau*S] | Area%   |
|---|----------|--------------|--------------|---------|
| 1 | 12.568   | 444.88535    | 1.15681e4    | 96.8596 |
| 2 | 13.655   | 13.08232     | 375.06302    | 3.1404  |

Chiral HPLC spectrum of compound **3g**

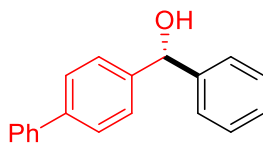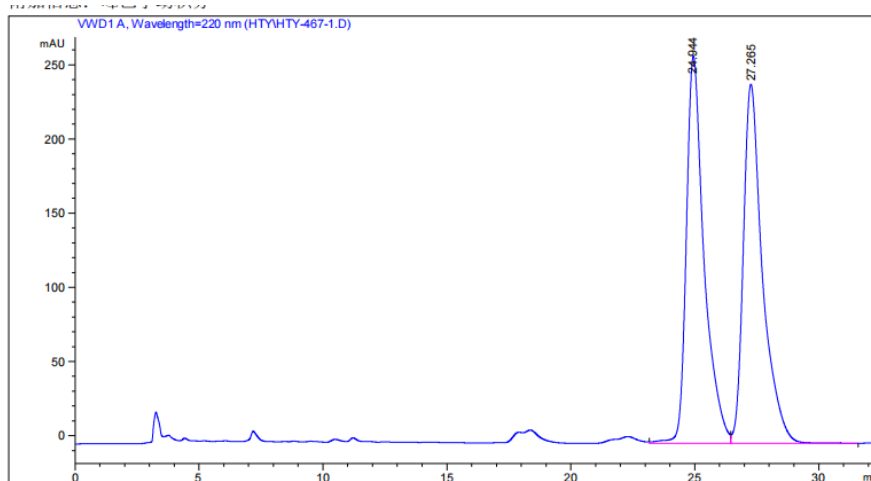

|   | RT (min) | Height [mAU] | Area [Mau*S] | Area%   |
|---|----------|--------------|--------------|---------|
| 1 | 24.944   | 260.86072    | 1.29937e4    | 49.9882 |
| 2 | 27.265   | 241.93271    | 2.29999e4    | 50.0118 |

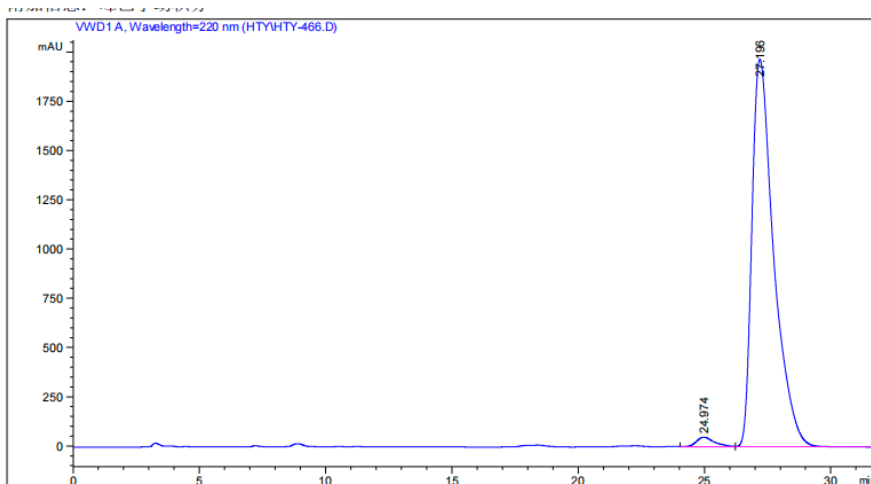

|   | RT (min) | Height [mAU] | Area [Mau*S] | Area%   |
|---|----------|--------------|--------------|---------|
| 1 | 24.974   | 49.51934     | 2508.04785   | 2.0760  |
| 2 | 27.196   | 1967.58301   | 1.18301e5    | 97.9240 |

### Chiral HPLC spectrum of compound **3h**

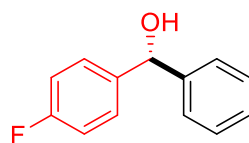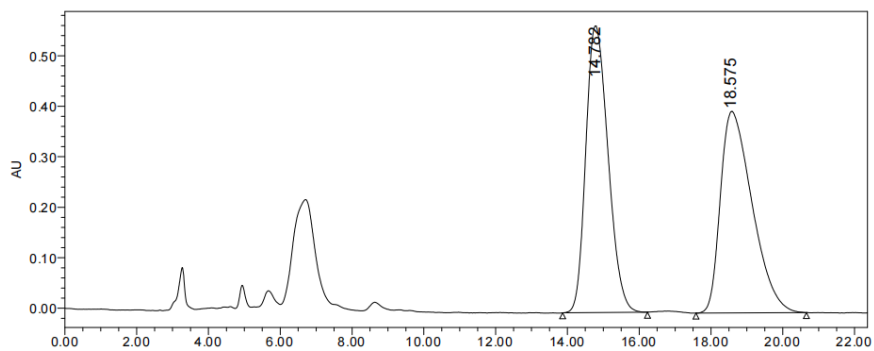

|   | RT (min) | Height [ $\mu$ V] | Area [ $\mu$ V*S] | Area% |
|---|----------|-------------------|-------------------|-------|
| 1 | 14.782   | 567763            | 24489828          | 49.96 |
| 2 | 18.575   | 399125            | 24531034          | 50.04 |

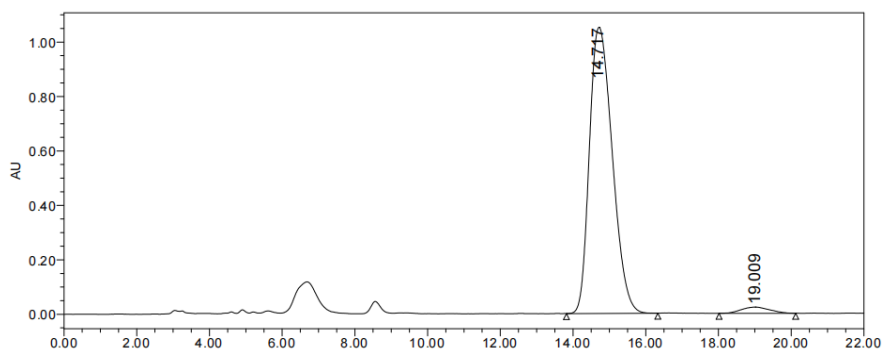

|   | RT (min) | Height [ $\mu$ V] | Area [ $\mu$ V*S] | Area% |
|---|----------|-------------------|-------------------|-------|
| 1 | 14.717   | 1051605           | 46023421          | 97.34 |
| 2 | 19.009   | 23210             | 1256477           | 2.66  |

Chiral HPLC spectrum of compound **3i**

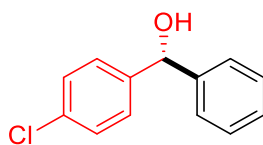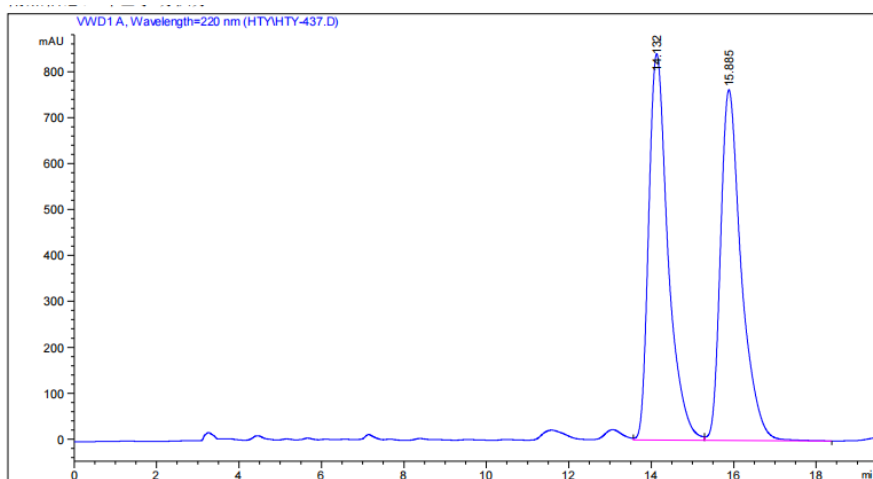

|   | RT (min) | Height [mAU] | Area [Mau*S] | Area%   |
|---|----------|--------------|--------------|---------|
| 1 | 14.132   | 839.48822    | 2.74261e4    | 50.7364 |
| 2 | 15.885   | 762.46222    | 2.66299e4    | 49.2636 |

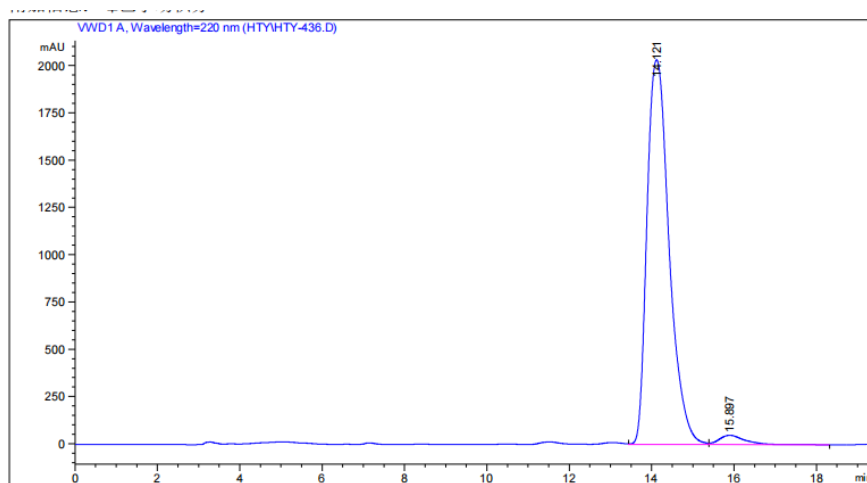

|   | RT (min) | Height [mAU] | Area [Mau*S] | Area%   |
|---|----------|--------------|--------------|---------|
| 1 | 14.121   | 2033.58569   | 7.58115e4    | 97.2621 |
| 2 | 15.897   | 48.85918     | 2134.05493   | 2.7379  |

### Chiral HPLC spectrum of compound **3j**

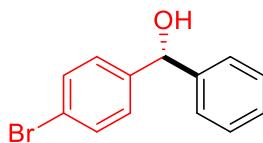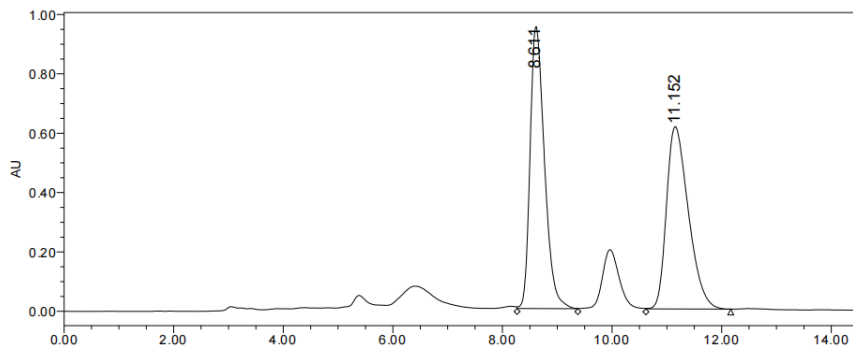

|   | RT (min) | Height [ $\mu\text{V}$ ] | Area [ $\mu\text{V}\cdot\text{S}$ ] | Area% |
|---|----------|--------------------------|-------------------------------------|-------|
| 1 | 8.611    | 949768                   | 17319933                            | 50.33 |
| 2 | 11.152   | 614121                   | 17095827                            | 49.67 |

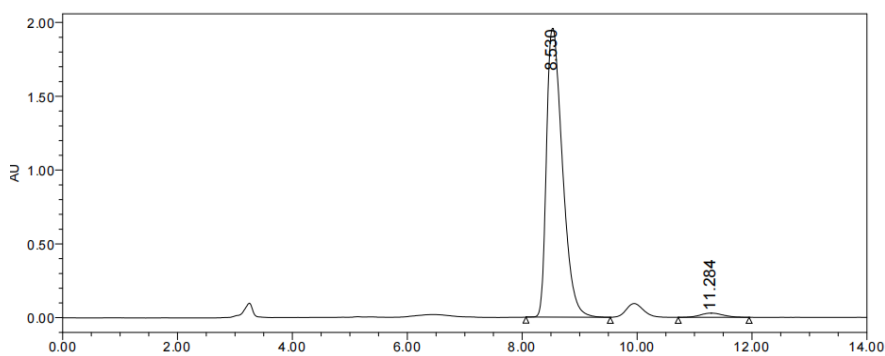

|   | RT (min) | Height [ $\mu\text{V}$ ] | Area [ $\mu\text{V}\cdot\text{S}$ ] | Area% |
|---|----------|--------------------------|-------------------------------------|-------|
| 1 | 8.530    | 1956879                  | 37656271                            | 97.95 |
| 2 | 11.284   | 28767                    | 786599                              | 2.05  |



# Chiral HPLC spectrum of compound **3k**

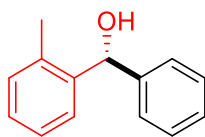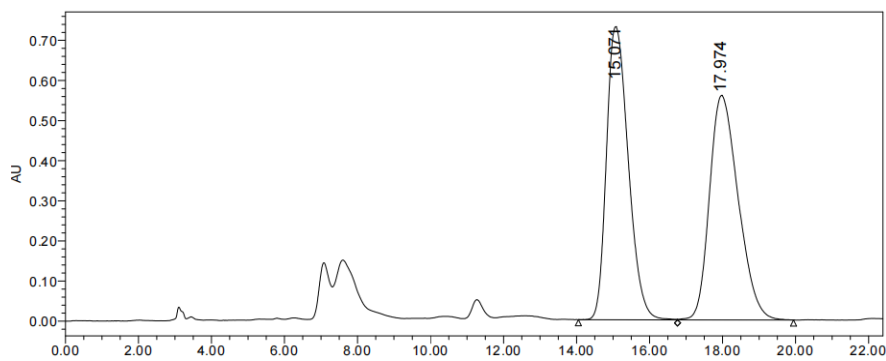

|   | RT (min) | Height [ $\mu$ V] | Area [ $\mu$ V*S] | Area% |
|---|----------|-------------------|-------------------|-------|
| 1 | 15.071   | 730500            | 30407921          | 49.81 |
| 2 | 17.974   | 559868            | 30637423          | 50.19 |

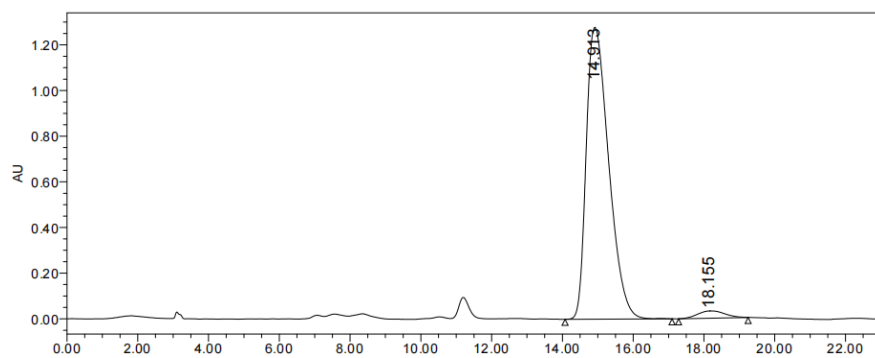

|   | RT (min) | Height [ $\mu$ V] | Area [ $\mu$ V*S] | Area% |
|---|----------|-------------------|-------------------|-------|
| 1 | 14.913   | 1277539           | 56297506          | 97.08 |
| 2 | 18.155   | 31568             | 1693906           | 2.92  |

# Chiral HPLC spectrum of compound **31**

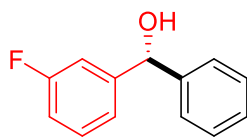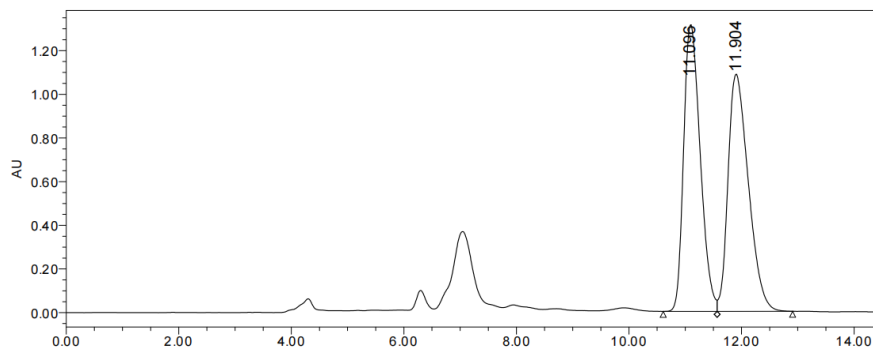

|   | RT (min) | Height [ $\mu$ V] | Area [ $\mu$ V*S] | Area% |
|---|----------|-------------------|-------------------|-------|
| 1 | 11.096   | 1312421           | 26939398          | 49.65 |
| 2 | 11.904   | 1085945           | 27315170          | 50.35 |

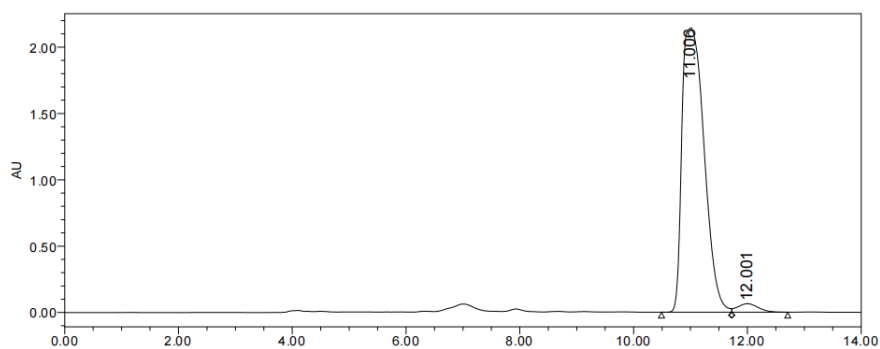

|   | RT (min) | Height [ $\mu$ V] | Area [ $\mu$ V*S] | Area% |
|---|----------|-------------------|-------------------|-------|
| 1 | 11.006   | 2142464           | 58141248          | 97.27 |
| 2 | 12.001   | 64130             | 1631618           | 2.73  |

# Chiral HPLC spectrum of compound **3m**

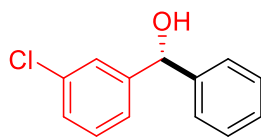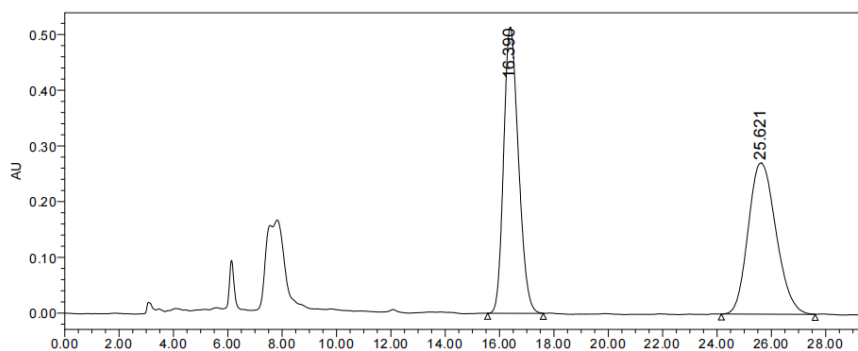

|   | RT (min) | Height [ $\mu$ V] | Area [ $\mu$ V*S] | Area% |
|---|----------|-------------------|-------------------|-------|
| 1 | 16.390   | 513687            | 19440732          | 50.19 |
| 2 | 25.621   | 271615            | 19294786          | 49.81 |

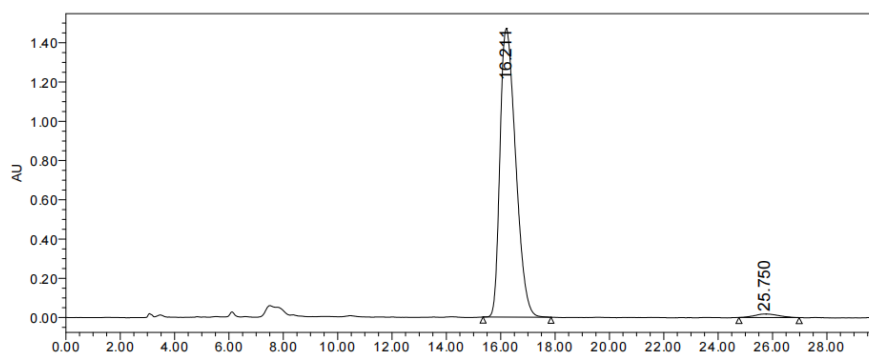

|   | RT (min) | Height [ $\mu$ V] | Area [ $\mu$ V*S] | Area% |
|---|----------|-------------------|-------------------|-------|
| 1 | 16.211   | 1472582           | 58850536          | 98.13 |
| 2 | 25.750   | 18078             | 1118508           | 1.87  |

# Chiral HPLC spectrum of compound 3n

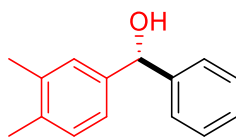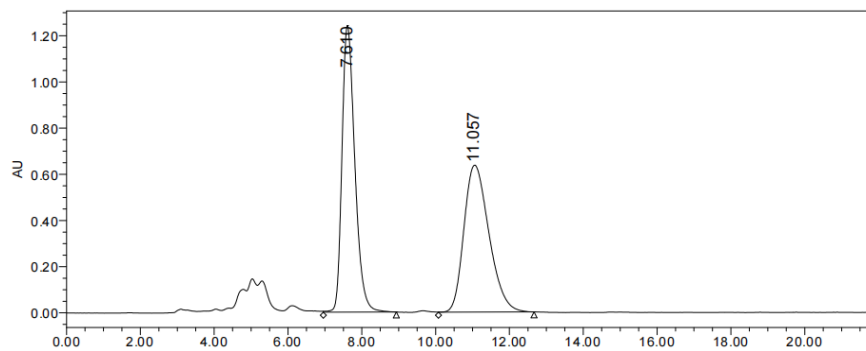

|   | RT (min) | Height [ $\mu$ V] | Area [ $\mu$ V*S] | Area% |
|---|----------|-------------------|-------------------|-------|
| 1 | 7.610    | 1241933           | 30084525          | 50.08 |
| 2 | 11.057   | 636202            | 29994167          | 49.92 |

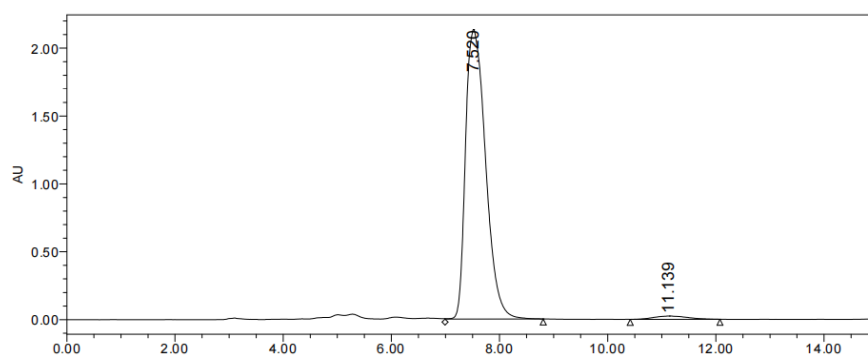

|   | RT (min) | Height [ $\mu$ V] | Area [ $\mu$ V*S] | Area% |
|---|----------|-------------------|-------------------|-------|
| 1 | 7.520    | 2133862           | 54861667          | 98.12 |
| 2 | 11.139   | 24104             | 1051727           | 1.88  |

### Chiral HPLC spectrum of compound **3o**

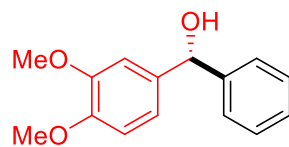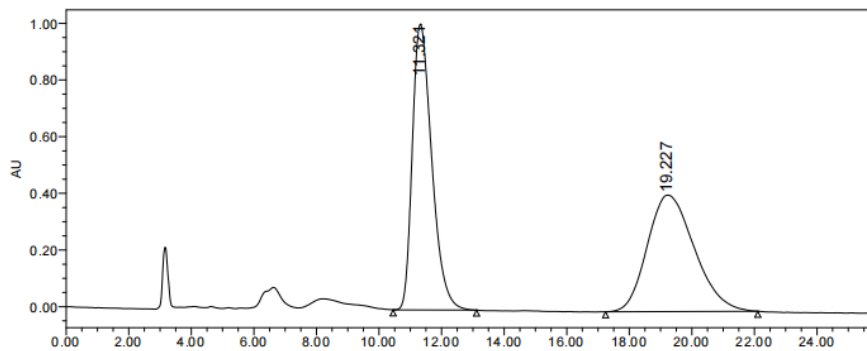

|   | RT (min) | Height [ $\mu$ V] | Area [ $\mu$ V*S] | Area% |
|---|----------|-------------------|-------------------|-------|
| 1 | 11.321   | 1007859           | 43556269          | 50.38 |
| 2 | 19.227   | 410787            | 42903925          | 49.62 |

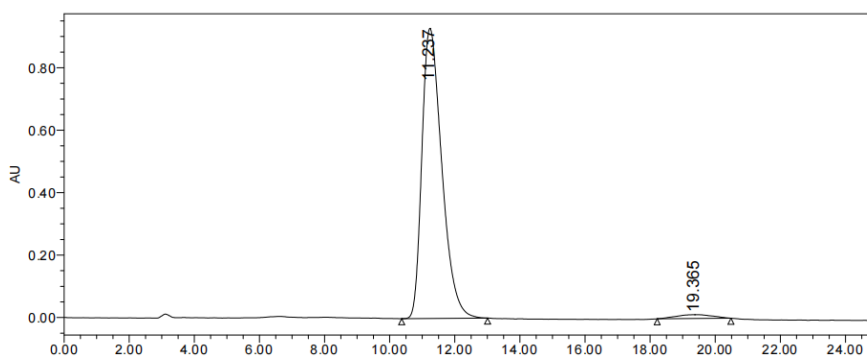

|   | RT (min) | Height [ $\mu$ V] | Area [ $\mu$ V*S] | Area% |
|---|----------|-------------------|-------------------|-------|
| 1 | 11.237   | 928873            | 39431874          | 97.64 |
| 2 | 19.365   | 12163             | 952638            | 2.36  |

Chiral HPLC spectrum of compound **3p**

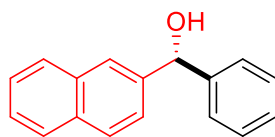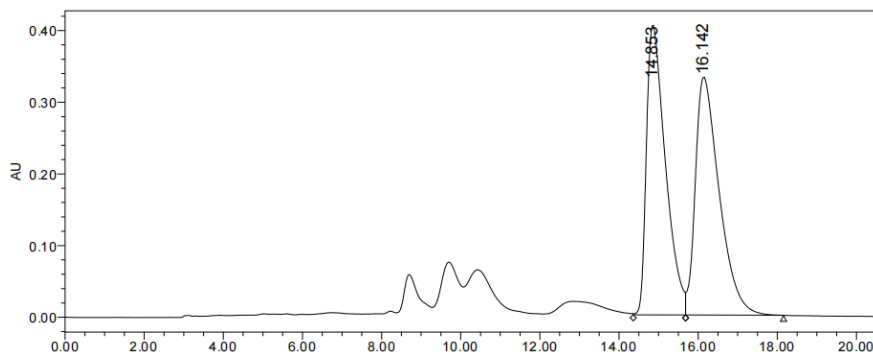

|   | RT (min) | Height [ $\mu$ V] | Area [ $\mu$ V*S] | Area% |
|---|----------|-------------------|-------------------|-------|
| 1 | 14.853   | 403749            | 13462495          | 49.12 |
| 2 | 16.142   | 331753            | 13942183          | 50.88 |

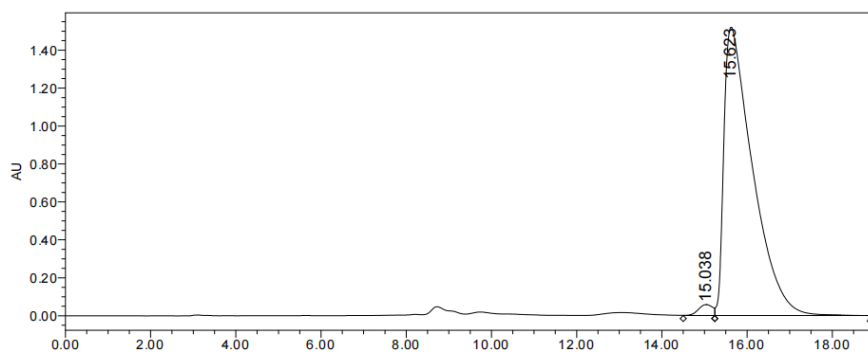

|   | RT (min) | Height [ $\mu$ V] | Area [ $\mu$ V*S] | Area% |
|---|----------|-------------------|-------------------|-------|
| 1 | 15.038   | 58245             | 1340171           | 1.85  |
| 2 | 15.623   | 1519411           | 71139782          | 98.15 |

Chiral HPLC spectrum of compound **3q**

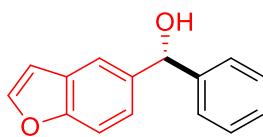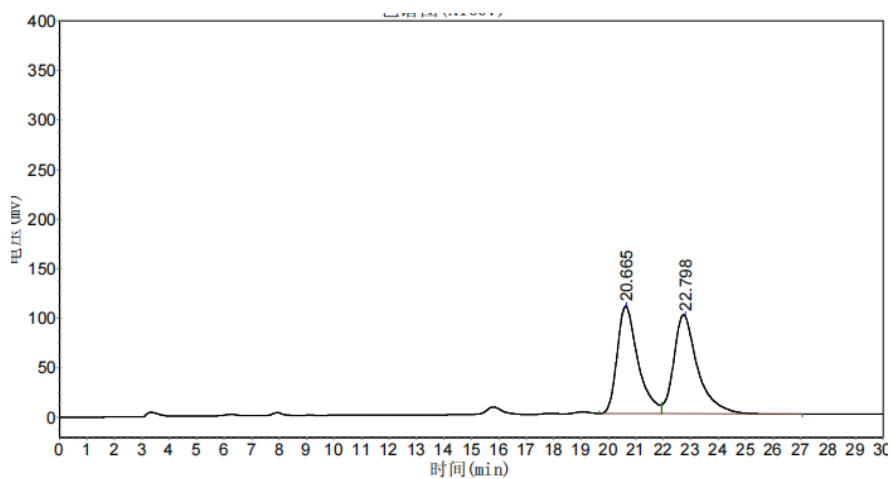

|   | RT (min) | Height [ $\mu$ V] | Area [ $\mu$ V*S] | Area%   |
|---|----------|-------------------|-------------------|---------|
| 1 | 20.665   | 109355            | 5864324           | 48.5255 |
| 2 | 22.798   | 100160            | 6220722           | 51.4745 |

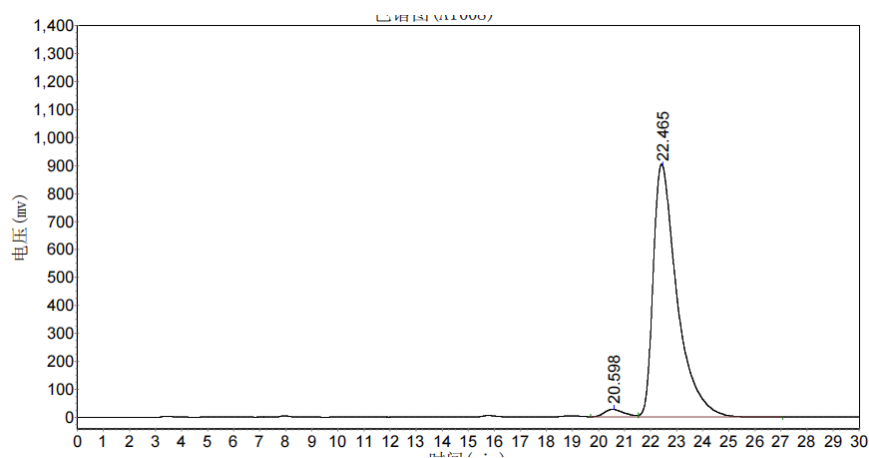

|   | RT (min) | Height [ $\mu$ V] | Area [ $\mu$ V*S] | Area%   |
|---|----------|-------------------|-------------------|---------|
| 1 | 20.598   | 27869             | 1512734           | 2.5716  |
| 2 | 22.465   | 901913            | 57312856          | 97.4284 |

# Chiral HPLC spectrum of compound 3r

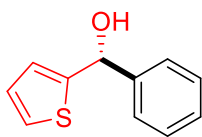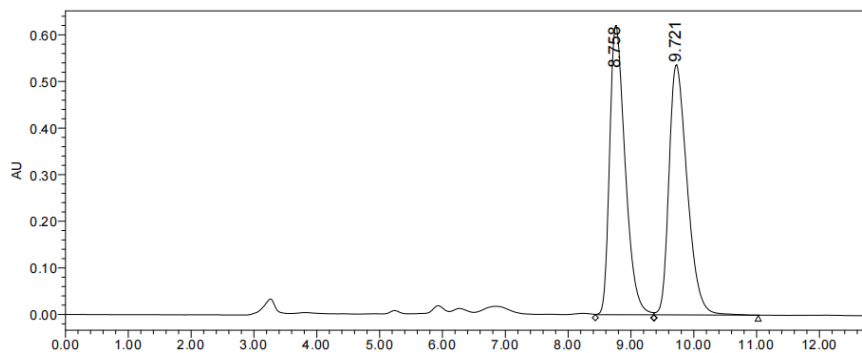

|   | RT (min) | Height [ $\mu$ V] | Area [ $\mu$ V*S] | Area% |
|---|----------|-------------------|-------------------|-------|
| 1 | 8.758    | 620896            | 10627071          | 49.59 |
| 2 | 9.721    | 536648            | 10804198          | 50.41 |

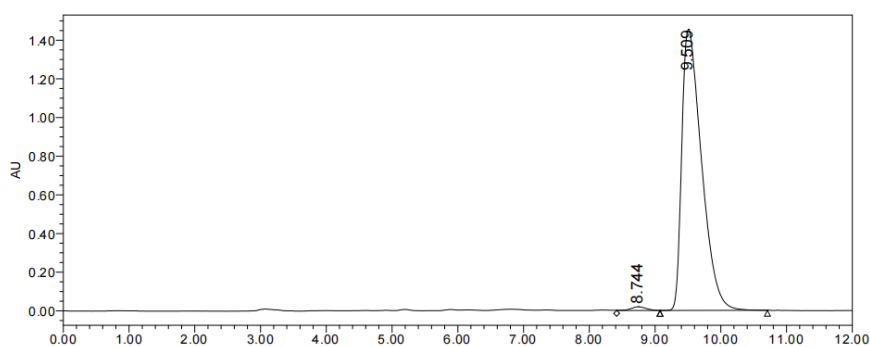

|   | RT (min) | Height [ $\mu$ V] | Area [ $\mu$ V*S] | Area% |
|---|----------|-------------------|-------------------|-------|
| 1 | 8.744    | 18981             | 300225            | 0.98  |
| 2 | 9.509    | 1454124           | 30370532          | 99.02 |



Chiral HPLC spectrum of compound **3s**

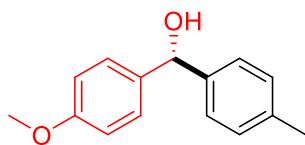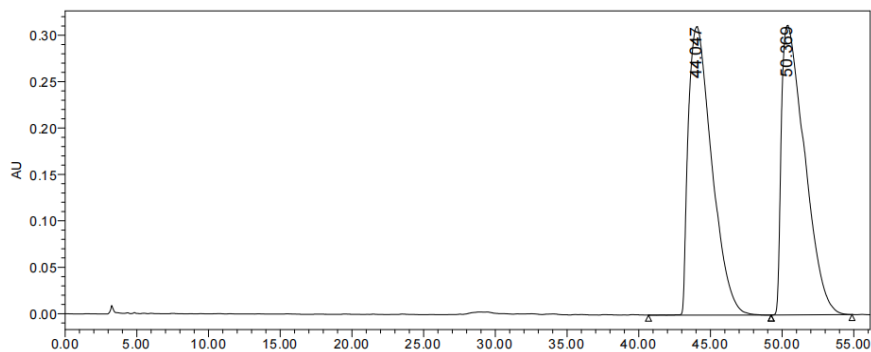

|   | RT (min) | Height [ $\mu$ V] | Area [ $\mu$ V*S] | Area% |
|---|----------|-------------------|-------------------|-------|
| 1 | 44.047   | 310755            | 35258815          | 50.19 |
| 2 | 50.369   | 311933            | 34986504          | 49.81 |

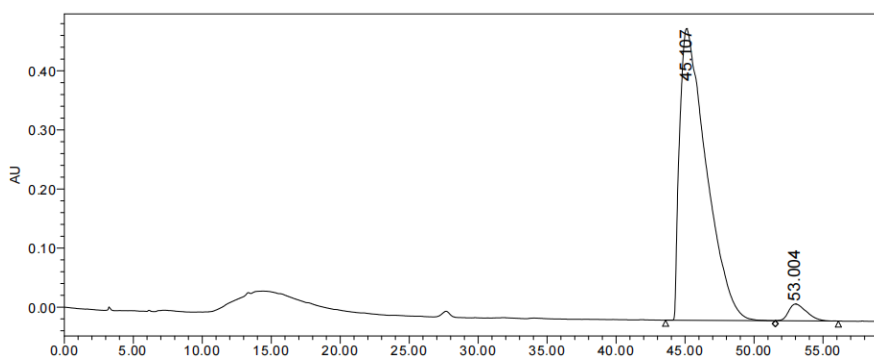

|   | RT (min) | Height [ $\mu$ V] | Area [ $\mu$ V*S] | Area% |
|---|----------|-------------------|-------------------|-------|
| 1 | 45.107   | 493803            | 66047726          | 96.24 |
| 2 | 53.004   | 28476             | 2577047           | 3.76  |

### Chiral HPLC spectrum of compound 3t

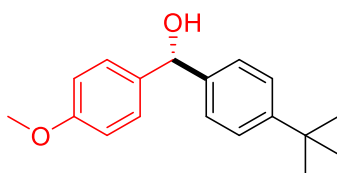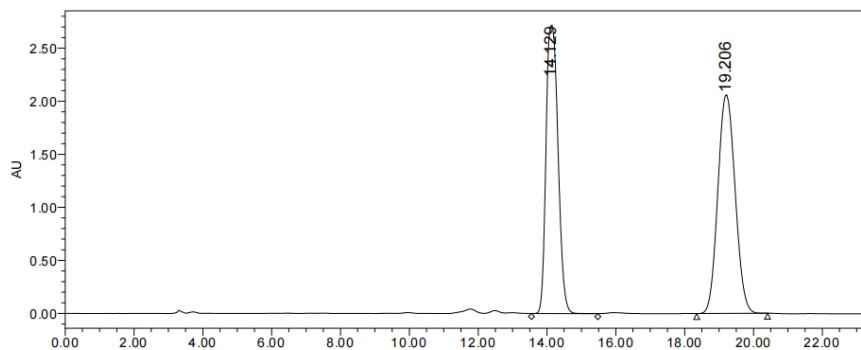

|   | RT (min) | Height [ $\mu$ V] | Area [ $\mu$ V*S] | Area% |
|---|----------|-------------------|-------------------|-------|
| 1 | 14.129   | 2716649           | 65709515          | 47.74 |
| 2 | 19.206   | 2057882           | 71921122          | 52.26 |

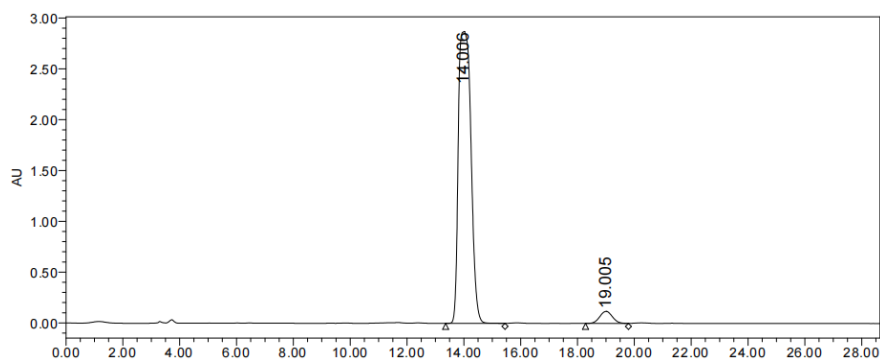

|   | RT (min) | Height [ $\mu$ V] | Area [ $\mu$ V*S] | Area% |
|---|----------|-------------------|-------------------|-------|
| 1 | 14.006   | 2871335           | 88234927          | 96.04 |
| 2 | 19.005   | 117978            | 3636467           | 3.96  |

# Chiral HPLC spectrum of compound **3u**

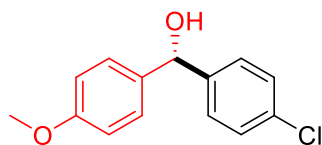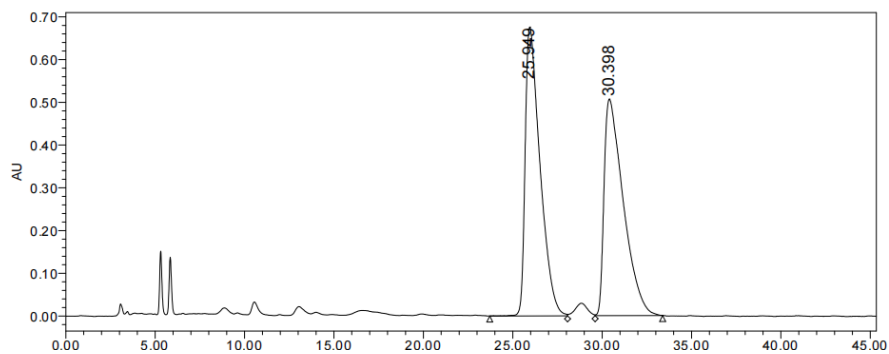

|   | RT (min) | Height [ $\mu$ V] | Area [ $\mu$ V*S] | Area% |
|---|----------|-------------------|-------------------|-------|
| 1 | 25.949   | 685586            | 39009308          | 50.70 |
| 2 | 30.398   | 506692            | 37931603          | 49.30 |

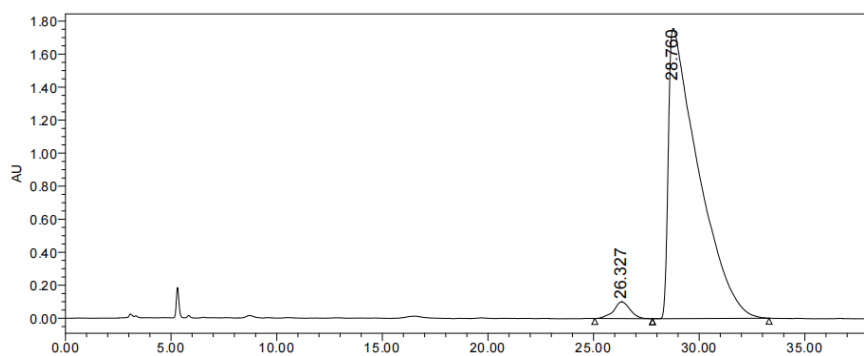

|   | RT (min) | Height [ $\mu$ V] | Area [ $\mu$ V*S] | Area% |
|---|----------|-------------------|-------------------|-------|
| 1 | 26.327   | 101460            | 5481368           | 3.06  |
| 2 | 28.760   | 1757087           | 173603625         | 96.94 |

### Chiral HPLC spectrum of compound **3v**

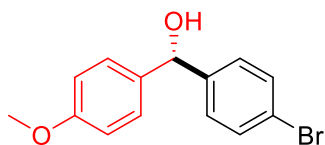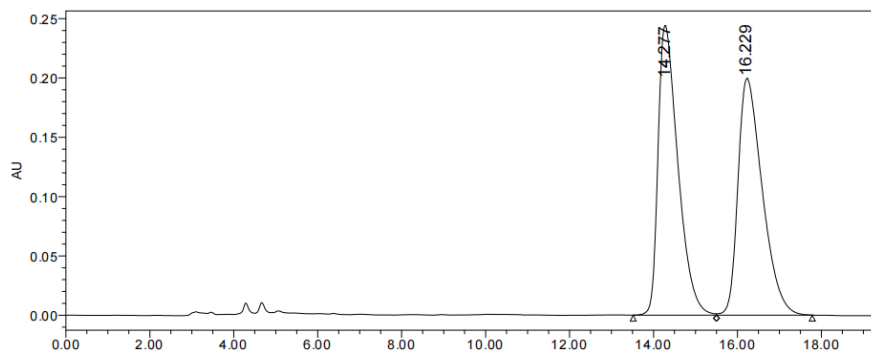

|   | RT (min) | Height [ $\mu$ V] | Area [ $\mu$ V*S] | Area% |
|---|----------|-------------------|-------------------|-------|
| 1 | 14.277   | 244091            | 8029403           | 49.98 |
| 2 | 16.229   | 199422            | 8036236           | 50.02 |

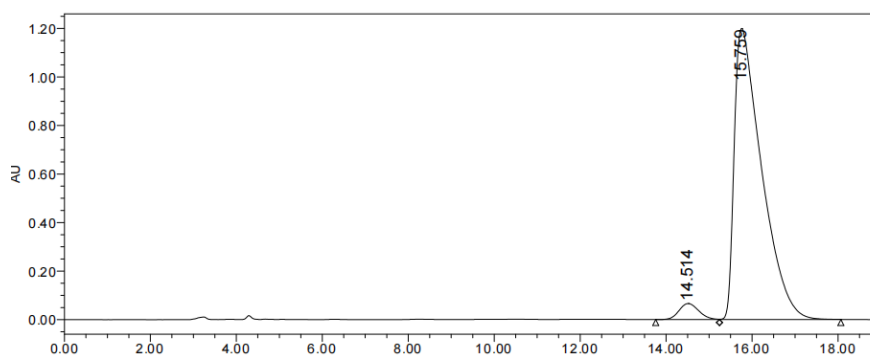

|   | RT (min) | Height [ $\mu$ V] | Area [ $\mu$ V*S] | Area% |
|---|----------|-------------------|-------------------|-------|
| 1 | 14.514   | 65950             | 2090241           | 3.79  |
| 2 | 15.759   | 1199045           | 53019632          | 96.21 |

### Chiral HPLC spectrum of compound **3w**

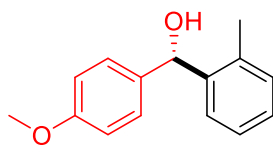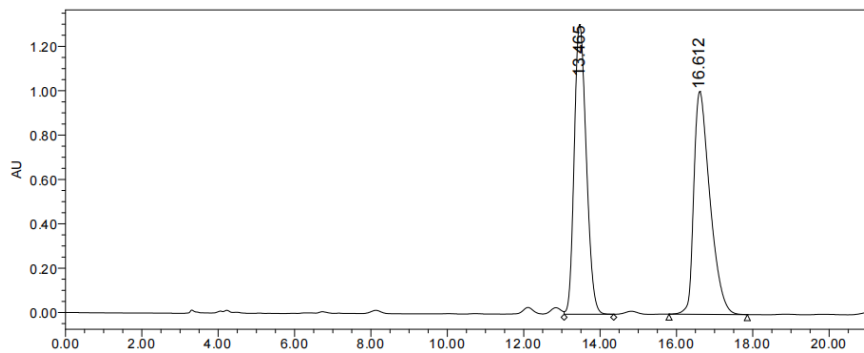

|   | RT (min) | Height [ $\mu$ V] | Area [ $\mu$ V*S] | Area% |
|---|----------|-------------------|-------------------|-------|
| 1 | 13.465   | 1306383           | 28621012          | 49.25 |
| 2 | 16.612   | 1004778           | 29497997          | 50.75 |

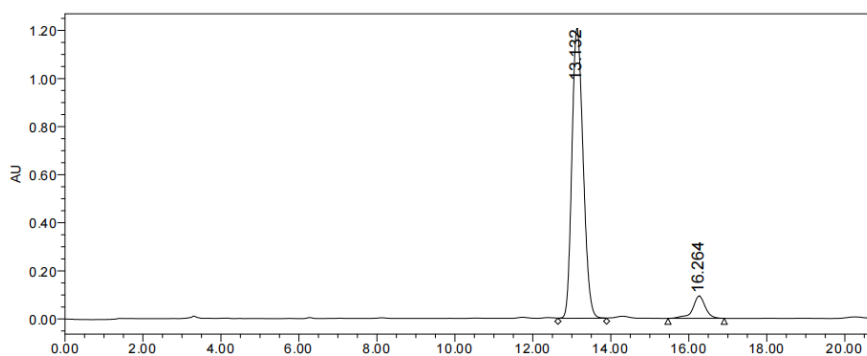

|   | RT (min) | Height [ $\mu$ V] | Area [ $\mu$ V*S] | Area% |
|---|----------|-------------------|-------------------|-------|
| 1 | 13.132   | 1205285           | 24048058          | 92.08 |
| 2 | 16.264   | 92737             | 2067017           | 7.92  |

Chiral HPLC spectrum of compound **3x**

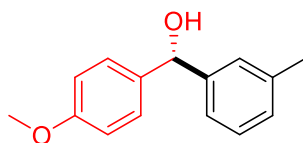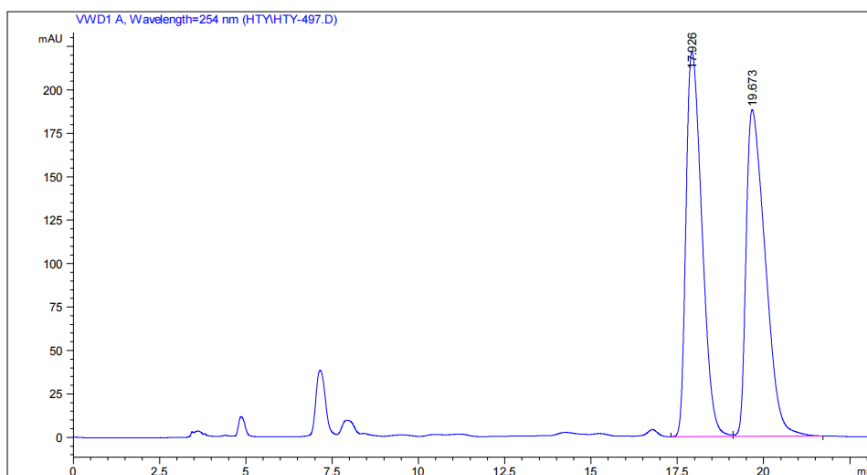

|   | RT (min) | Height [mAU] | Area [Mau*S] | Area%   |
|---|----------|--------------|--------------|---------|
| 1 | 17.926   | 221.53233    | 7092.17432   | 49.5021 |
| 2 | 19.673   | 187.93378    | 7234.84033   | 50.4979 |

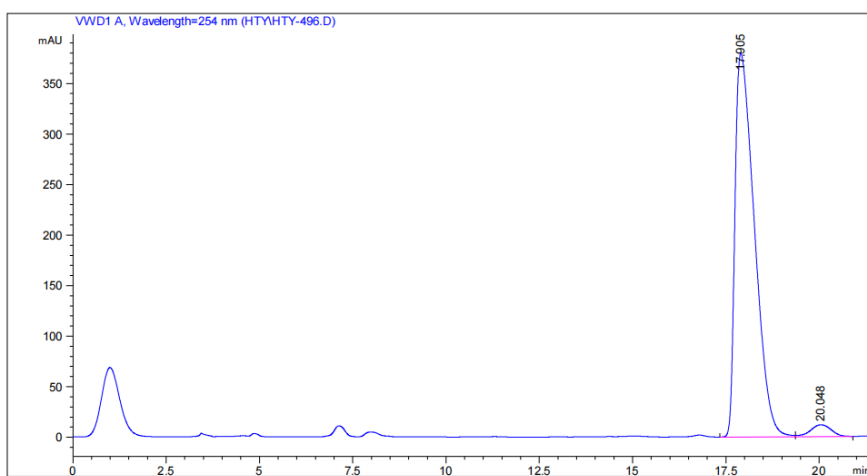

|   | RT (min) | Height [mAU] | Area [Mau*S] | Area%   |
|---|----------|--------------|--------------|---------|
| 1 | 17.905   | 379.44431    | 1.37276e4    | 96.8522 |
| 2 | 20.048   | 11.57677     | 446.15497    | 3.1478  |

### Chiral HPLC spectrum of compound **3y**

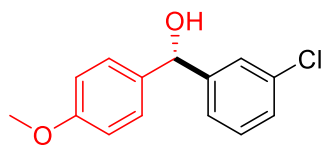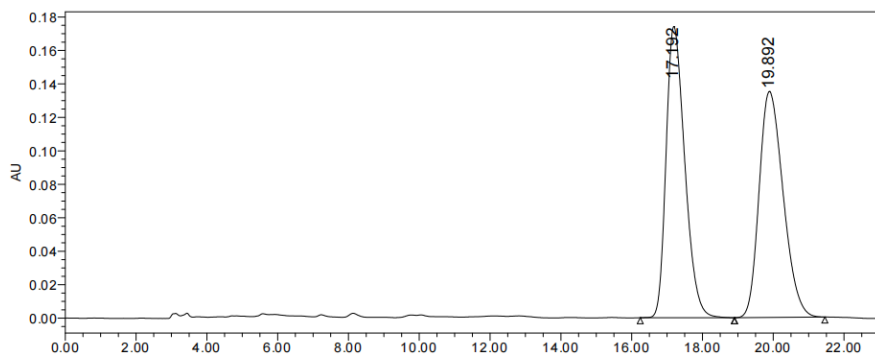

|   | RT (min) | Height [ $\mu$ V] | Area [ $\mu$ V*S] | Area% |
|---|----------|-------------------|-------------------|-------|
| 1 | 17.192   | 174045            | 6386665           | 50.05 |
| 2 | 19.892   | 135054            | 6373334           | 49.95 |

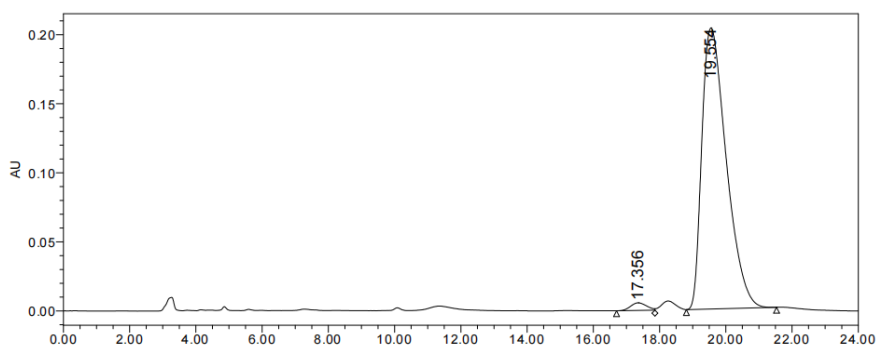

|   | RT (min) | Height [ $\mu$ V] | Area [ $\mu$ V*S] | Area% |
|---|----------|-------------------|-------------------|-------|
| 1 | 17.356   | 5532              | 185483            | 1.75  |
| 2 | 19.554   | 203545            | 10425632          | 98.25 |

Chiral HPLC spectrum of compound **3z**

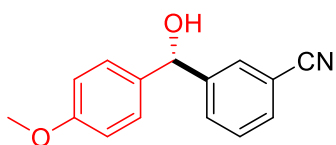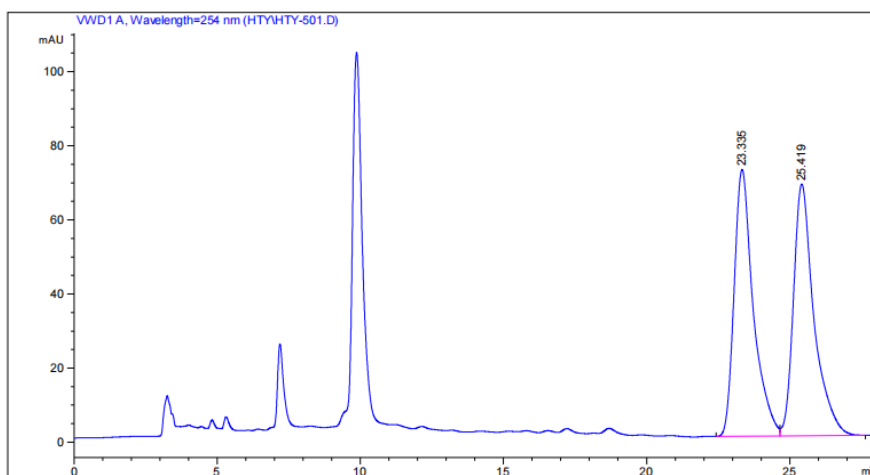

|   | RT (min) | Height [mAU] | Area [Mau*S] | Area%   |
|---|----------|--------------|--------------|---------|
| 1 | 23.335   | 71.97838     | 3349.51807   | 49.7591 |
| 2 | 25.419   | 67.91109     | 3381.94531   | 50.2409 |

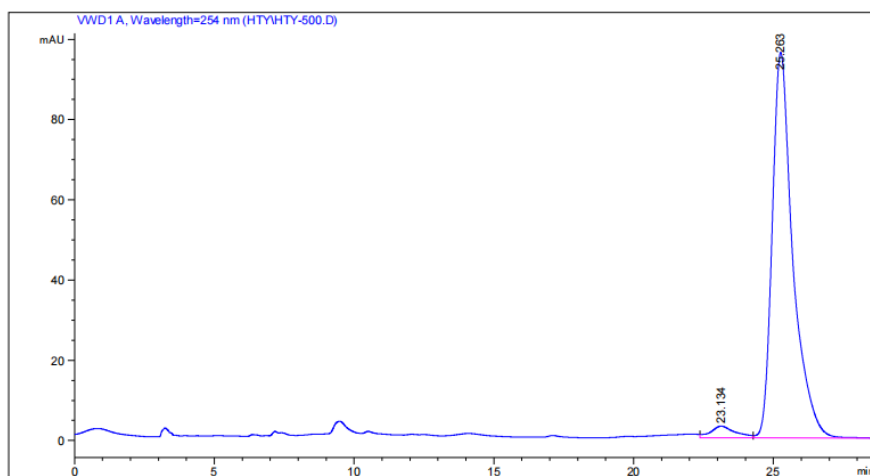

|   | RT (min) | Height [mAU] | Area [Mau*S] | Area%   |
|---|----------|--------------|--------------|---------|
| 1 | 23.134   | 2.93562      | 179.79250    | 3.5153  |
| 2 | 25.263   | 96.07359     | 4934.76514   | 96.4847 |



# Chiral HPLC spectrum of compound 3aa

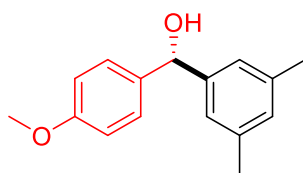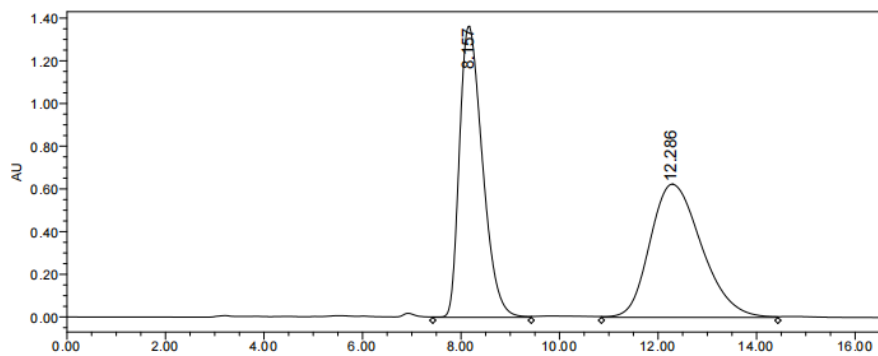

|   | RT (min) | Height [ $\mu$ V] | Area [ $\mu$ V*S] | Area% |
|---|----------|-------------------|-------------------|-------|
| 1 | 8.157    | 1362824           | 44284832          | 49.41 |
| 2 | 12.286   | 623726            | 45350352          | 50.59 |

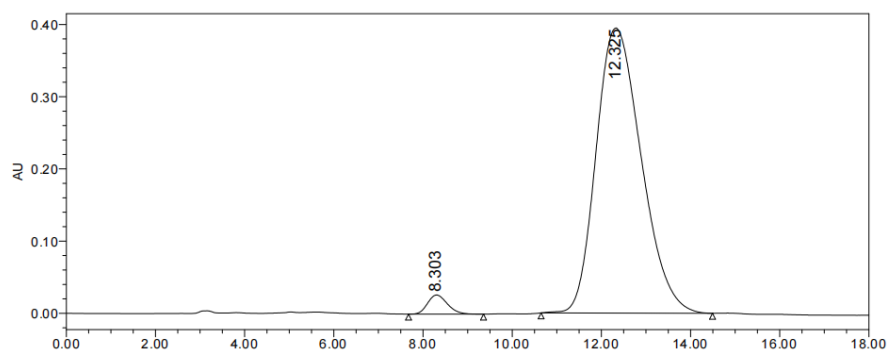

|   | RT (min) | Height [ $\mu$ V] | Area [ $\mu$ V*S] | Area% |
|---|----------|-------------------|-------------------|-------|
| 1 | 8.303    | 26472             | 816488            | 2.86  |
| 2 | 12.325   | 394622            | 27761259          | 97.14 |

Chiral HPLC spectrum of compound **3ab**

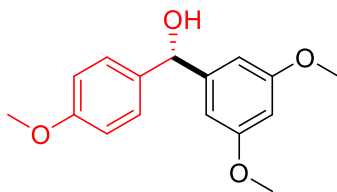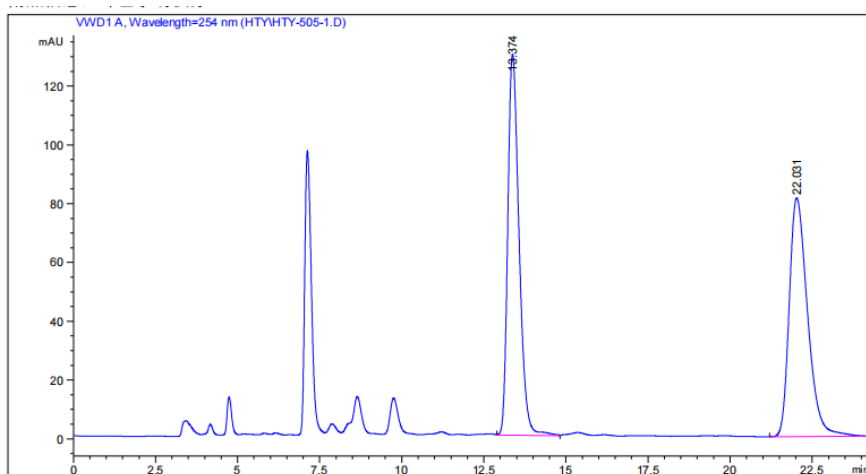

|   | RT (min) | Height [mAU] | Area [Mau*S] | Area%   |
|---|----------|--------------|--------------|---------|
| 1 | 13.374   | 129.55150    | 3083.76953   | 49.5145 |
| 2 | 22.031   | 81.23961     | 3144.24463   | 50.4855 |

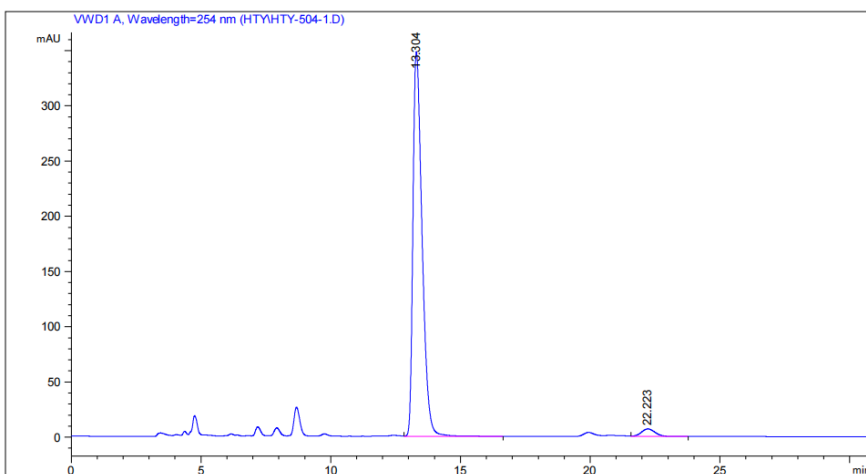

|   | RT (min) | Height [mAU] | Area [Mau*S] | Area%   |
|---|----------|--------------|--------------|---------|
| 1 | 13.304   | 348.47696    | 8509.54492   | 97.0544 |
| 2 | 22.223   | 6.90137      | 258.26291    | 2.9456  |

### Chiral HPLC spectrum of compound **3ac**

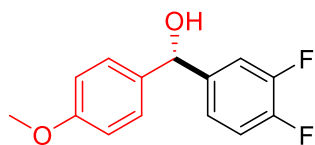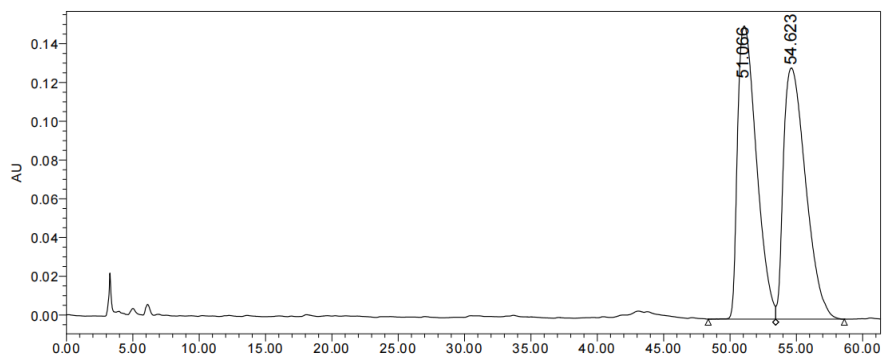

|   | RT (min) | Height [ $\mu$ V] | Area [ $\mu$ V*S] | Area% |
|---|----------|-------------------|-------------------|-------|
| 1 | 51.066   | 151245            | 14928268          | 49.68 |
| 2 | 54.623   | 129602            | 15119883          | 50.32 |

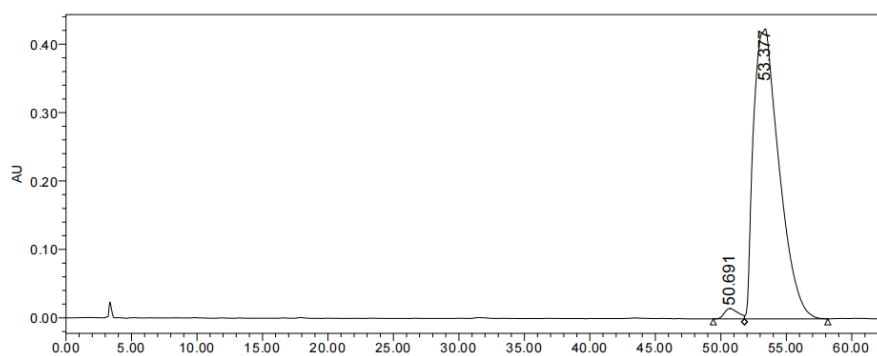

|   | RT (min) | Height [ $\mu$ V] | Area [ $\mu$ V*S] | Area% |
|---|----------|-------------------|-------------------|-------|
| 1 | 50.691   | 15084             | 1093454           | 1.87  |
| 2 | 53.377   | 423412            | 57383946          | 98.13 |

# Chiral HPLC spectrum of compound **3ad**

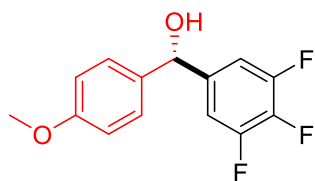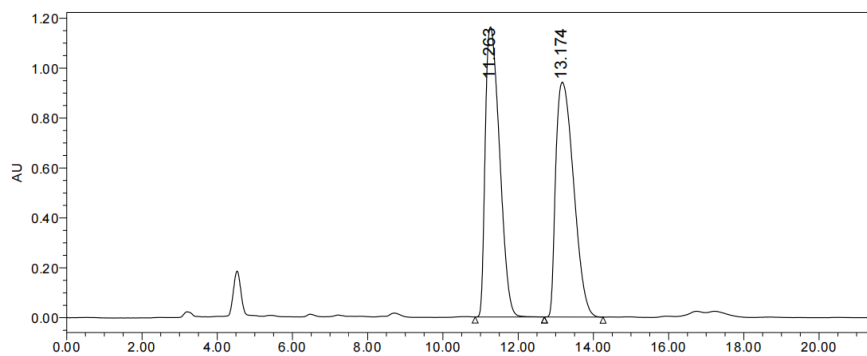

|   | RT (min) | Height [ $\mu$ V] | Area [ $\mu$ V*S] | Area% |
|---|----------|-------------------|-------------------|-------|
| 1 | 11.263   | 1160838           | 30642351          | 49.72 |
| 2 | 13.174   | 940134            | 30989703          | 50.28 |

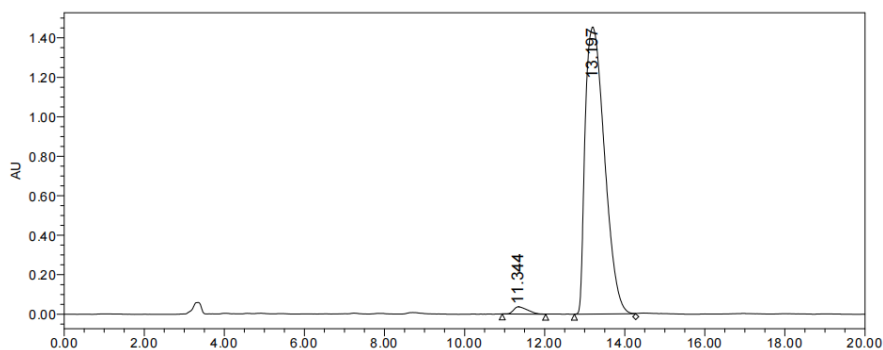

|   | RT (min) | Height [ $\mu$ V] | Area [ $\mu$ V*S] | Area% |
|---|----------|-------------------|-------------------|-------|
| 1 | 11.344   | 36547             | 877895            | 1.77  |
| 2 | 13.197   | 1453411           | 48618733          | 98.23 |
